# Supplementary material for: Seed survival of Australian Acacia in the Western Cape of South Africa in the presence of biological control agents and given environmental variation
Source: PeerJ. 2019 Apr 29;7:e6816. doi: 10.7717/peerj.6816 (PMC6497107; doi:10.7717/peerj.6816)
Supplement: Data S1 [file peerj-07-6816-s007.xlsx]

## Sheet: Site locations
Site	Site Abbreviations	Species	Co-ordinates
Fable	FB	Al	S 33° 21’ E 19° 13’
Mooiplaas	MP	Al	S 33° 28’ E 19° 09’
De liefde	DLL	Al	S 33° 29’ E 19° 14’
Avondvrede	AVL	Al	S 33° 49’ E 18° 52’
Meulvlakte	MV	Al	S 33° 03’ E 19° 29’
White river	WR	Al	S 34° 24’ E 19° 32’
Heuningbos	HB	Al	S 34° 33’ E 19° 52’
Romansrivier	RR	Al	S 33° 28’ E 19° 12’
Fraaigelegen	FGM	Am	S 33° 21’ E 19° 12’
De Kijker	DK	Am	S 33° 26’ E 19° 09’
De Liefde	DLM	Am	S 33° 29’ E 19° 14’
Waboomsrivier	WB	Am	S 33° 29’ E 19° 12’
Rivendale	RDM	Am	S 33° 46’ E 18° 47’
Avondvrede	AVM	Am	S 33° 49’ E 18° 52’
Wolseley	WL	Ap	S 33° 25’ E 19° 10’
Vaalvlei	VV	Ap	S 33° 28’ E 19° 12’
De liefde	DLP	Ap	S 33° 29’ E 19° 13’
Rivendale	RDP	Ap	S 33° 46’ E 18° 47’
Iddasvalley	IV	Ap	S 33° 55’ E 18° 54’
Squaredale	SD	Ap	S 33° 17’ E 19° 46’
Locheim	LH	As	S 33° 13’ E 18° 39’
Fraaigelegen	FGS	As	S 33° 21’ E 19° 12’
Haasvlakte	HV	As	S 33° 28’ E 19° 11’
Lio Marico	LM	As	S 33° 45’ E 18° 46’
Paarl	PN	As	S 33° 41’ E 18° 58’
Modderrivier	MR	As	S 34° 25’ E 19° 30’
Fairfield	FF	As	S 33° 24’ E 19° 48’

## Sheet:  Predation and Abort
Site	Species	Year	Tree	Sample	SeedC	Aborted	Predated
LH	As	2012	1	1	8	0	1
LH	As	2012	1	2	11	0	0
LH	As	2012	1	3	13	2	0
LH	As	2012	1	4	10	2	0
LH	As	2012	1	5	13	7	0
LH	As	2012	1	6	11	4	0
LH	As	2012	1	7	12	10	0
LH	As	2012	1	8	10	1	0
LH	As	2012	1	9	12	4	0
LH	As	2012	1	10	9	5	0
LH	As	2012	1	11	12	6	0
LH	As	2012	1	12	6	2	0
LH	As	2012	1	13	10	8	0
LH	As	2012	1	14	10	4	1
LH	As	2012	1	15	11	8	0
LH	As	2012	1	16	9	4	0
LH	As	2012	1	17	4	1	1
LH	As	2012	1	18	10	6	0
LH	As	2012	1	19	12	11	1
LH	As	2012	1	20	13	7	0
LH	As	2012	1	21	11	4	0
LH	As	2012	1	22	12	10	0
LH	As	2012	1	23	10	1	0
LH	As	2012	1	24	12	4	0
LH	As	2012	1	25	9	5	0
LH	As	2012	1	26	12	6	0
LH	As	2012	1	27	6	2	0
LH	As	2012	1	28	10	8	0
LH	As	2012	1	29	10	4	1
LH	As	2012	1	30	11	8	0
LH	As	2012	1	31	12	7	0
LH	As	2012	1	32	7	5	0
LH	As	2012	1	33	10	8	0
LH	As	2012	1	34	7	3	0
LH	As	2012	2	1	6	0	0
LH	As	2012	2	2	9	1	0
LH	As	2012	2	3	8	2	0
LH	As	2012	2	4	8	2	0
LH	As	2012	2	5	10	2	0
LH	As	2012	2	6	9	1	0
LH	As	2012	2	7	9	0	0
LH	As	2012	2	8	8	1	0
LH	As	2012	2	9	7	1	0
LH	As	2012	2	10	9	3	0
LH	As	2012	2	11	8	1	0
LH	As	2012	2	12	7	1	0
LH	As	2012	2	13	8	1	0
LH	As	2012	2	14	8	1	0
LH	As	2012	2	15	9	1	0
LH	As	2012	2	16	10	1	0
LH	As	2012	2	17	8	1	0
LH	As	2012	2	18	8	1	0
LH	As	2012	2	19	9	3	0
LH	As	2012	2	20	8	2	0
LH	As	2012	2	21	10	3	0
LH	As	2012	2	22	9	2	0
LH	As	2012	2	23	7	2	0
LH	As	2012	2	24	8	1	0
LH	As	2012	2	25	6	1	0
LH	As	2012	2	26	9	2	0
LH	As	2012	2	27	6	2	0
LH	As	2012	2	28	7	1	0
LH	As	2012	2	29	7	2	0
LH	As	2012	2	30	9	2	0
LH	As	2012	2	31	7	0	0
LH	As	2012	2	32	9	3	0
LH	As	2012	2	33	10	2	0
LH	As	2012	2	34	10	6	0
LH	As	2012	2	35	11	2	0
LH	As	2012	2	36	7	0	0
LH	As	2012	2	37	8	1	0
LH	As	2012	2	38	8	2	0
LH	As	2012	2	39	8	0	0
LH	As	2012	2	40	9	4	0
LH	As	2012	2	41	8	1	0
LH	As	2012	2	42	8	0	0
LH	As	2012	2	43	9	2	0
LH	As	2012	2	44	5	2	0
LH	As	2012	2	45	7	2	0
LH	As	2012	2	46	7	2	0
LH	As	2012	2	47	7	1	0
LH	As	2012	2	48	9	1	0
LH	As	2012	2	49	8	4	0
LH	As	2012	2	50	9	1	0
LH	As	2012	3	1	8	3	0
LH	As	2012	3	2	10	1	0
LH	As	2012	3	3	9	0	0
LH	As	2012	3	4	7	1	0
LH	As	2012	3	5	8	2	0
LH	As	2012	3	6	9	5	0
LH	As	2012	3	7	10	2	0
LH	As	2012	3	8	9	1	0
LH	As	2012	3	9	6	2	0
LH	As	2012	3	10	11	6	0
LH	As	2012	3	11	10	6	0
LH	As	2012	3	12	4	1	0
LH	As	2012	3	13	1	0	0
LH	As	2012	3	14	7	5	0
LH	As	2012	3	15	8	3	0
LH	As	2012	3	16	8	5	0
LH	As	2012	3	17	9	6	0
LH	As	2012	3	18	5	1	1
LH	As	2012	3	19	5	1	0
LH	As	2012	3	20	7	5	0
LH	As	2012	3	21	9	6	0
LH	As	2012	3	22	7	1	1
LH	As	2012	3	23	9	0	0
LH	As	2012	3	24	9	3	0
LH	As	2012	3	25	10	3	0
LH	As	2012	3	26	9	4	0
LH	As	2012	3	27	4	0	0
LH	As	2012	3	28	3	0	0
LH	As	2012	3	29	9	7	0
LH	As	2012	3	30	7	0	0
LH	As	2012	3	31	8	2	0
LH	As	2012	3	32	10	7	1
LH	As	2012	3	33	9	1	0
LH	As	2012	3	34	8	2	0
LH	As	2012	3	35	9	0	0
LH	As	2012	3	36	10	2	0
LH	As	2012	3	37	10	3	0
LH	As	2012	3	38	9	4	0
LH	As	2012	3	39	9	2	0
LH	As	2012	3	40	9	0	0
LH	As	2012	3	41	8	2	0
LH	As	2012	3	42	4	2	1
LH	As	2012	3	43	8	5	0
LH	As	2012	3	44	9	5	0
LH	As	2012	3	45	9	2	0
LH	As	2012	3	46	9	2	0
LH	As	2012	3	47	6	1	0
LH	As	2012	3	48	7	2	0
LH	As	2012	3	49	5	2	0
LH	As	2012	3	50	5	3	0
LH	As	2012	3	51	6	3	0
LH	As	2012	3	52	4	0	0
LH	As	2012	3	53	3	0	0
LH	As	2012	4	1	9	5	0
LH	As	2012	4	2	6	5	0
LH	As	2012	4	3	10	3	0
LH	As	2012	4	4	8	2	0
LH	As	2012	4	5	8	1	0
LH	As	2012	4	6	9	1	0
LH	As	2012	4	7	4	0	0
LH	As	2012	4	8	10	0	0
LH	As	2012	4	9	8	5	0
LH	As	2012	4	10	8	6	0
LH	As	2012	4	11	7	0	0
LH	As	2012	4	12	7	3	0
LH	As	2012	4	13	9	5	0
LH	As	2012	4	14	7	0	1
LH	As	2012	4	15	7	4	0
LH	As	2012	4	16	8	6	0
LH	As	2012	4	17	5	0	0
LH	As	2012	4	18	8	4	0
LH	As	2012	4	19	9	8	0
LH	As	2012	4	20	9	8	0
LH	As	2012	4	21	8	0	0
LH	As	2012	4	22	8	1	0
LH	As	2012	4	23	7	2	0
LH	As	2012	4	24	6	5	0
LH	As	2012	4	25	7	5	0
LH	As	2012	4	26	8	2	0
LH	As	2012	4	27	7	6	0
LH	As	2012	4	28	7	3	2
LH	As	2012	4	29	7	6	0
LH	As	2012	4	30	9	2	0
LH	As	2012	4	31	10	3	0
LH	As	2012	4	32	10	2	0
LH	As	2012	4	33	9	4	0
LH	As	2012	4	34	9	3	0
LH	As	2012	4	35	9	2	1
LH	As	2012	4	36	10	8	0
LH	As	2012	4	37	9	7	0
LH	As	2012	4	38	9	2	0
LH	As	2012	4	39	6	1	0
LH	As	2012	4	40	7	2	0
LH	As	2012	4	41	4	0	0
LH	As	2012	4	42	7	5	0
LH	As	2012	4	43	8	8	0
LH	As	2012	4	44	11	4	0
LH	As	2012	4	45	9	2	0
LH	As	2012	4	46	6	3	0
LH	As	2012	4	47	8	5	0
LH	As	2012	4	48	9	1	0
LH	As	2012	4	49	8	6	0
LH	As	2012	4	50	7	4	0
LH	As	2012	4	51	8	6	0
LH	As	2012	4	52	8	6	0
LH	As	2012	5	1	12	3	0
LH	As	2012	5	2	9	0	0
LH	As	2012	5	3	9	2	0
LH	As	2012	5	4	4	1	0
LH	As	2012	5	5	9	2	0
LH	As	2012	5	6	7	1	0
LH	As	2012	5	7	9	1	0
LH	As	2012	5	8	8	1	0
LH	As	2012	5	9	8	1	0
LH	As	2012	5	10	9	2	1
LH	As	2012	5	11	7	2	0
LH	As	2012	5	12	6	2	0
LH	As	2012	5	13	6	2	0
LH	As	2012	5	14	7	2	0
LH	As	2012	5	15	8	1	0
LH	As	2012	5	16	9	2	0
LH	As	2012	5	17	9	1	0
LH	As	2012	5	18	10	1	0
LH	As	2012	5	19	7	2	0
LH	As	2012	5	20	9	4	0
LH	As	2012	5	21	7	3	0
LH	As	2012	5	22	8	1	0
LH	As	2012	5	23	6	2	0
LH	As	2012	5	24	5	1	0
LH	As	2012	5	25	8	0	0
LH	As	2012	5	26	7	1	0
LH	As	2012	5	27	7	2	0
LH	As	2012	5	28	8	1	0
LH	As	2012	5	29	9	0	0
LH	As	2012	5	30	8	0	0
LH	As	2012	5	31	7	1	0
LH	As	2012	5	32	9	1	0
LH	As	2012	5	33	9	1	0
LH	As	2012	5	34	7	3	0
LH	As	2012	5	35	8	1	0
LH	As	2012	5	36	9	3	0
LH	As	2012	5	37	7	1	0
LH	As	2012	5	38	10	0	0
LH	As	2012	5	39	8	4	0
LH	As	2012	5	40	8	2	0
LH	As	2012	5	41	6	1	0
LH	As	2012	5	42	6	2	0
LH	As	2012	5	43	6	2	0
LH	As	2012	5	44	8	1	0
LH	As	2012	5	45	8	2	0
LH	As	2012	5	46	10	0	0
LH	As	2012	5	47	6	0	0
LH	As	2012	5	48	9	0	0
LH	As	2012	5	49	9	0	0
LH	As	2012	5	50	8	1	0
LH	As	2012	5	51	9	0	0
LH	As	2012	5	52	10	1	0
LH	As	2012	5	53	9	2	0
LH	As	2012	6	1	5	1	0
LH	As	2012	6	2	7	1	0
LH	As	2012	6	3	7	0	0
LH	As	2012	6	4	5	2	1
LH	As	2012	6	5	8	8	0
LH	As	2012	6	6	8	1	0
LH	As	2012	6	7	8	3	0
LH	As	2012	6	8	4	1	0
LH	As	2012	6	9	4	0	0
LH	As	2012	6	10	8	2	0
LH	As	2012	6	11	5	1	0
LH	As	2012	6	12	5	2	0
LH	As	2012	6	13	4	2	0
LH	As	2012	6	14	7	2	0
LH	As	2012	6	15	3	2	0
LH	As	2012	6	16	5	0	0
LH	As	2012	6	17	8	8	0
LH	As	2012	6	18	5	3	0
LH	As	2012	6	19	7	0	0
LH	As	2012	6	20	6	2	0
LH	As	2012	6	21	6	0	0
LH	As	2012	6	22	5	1	0
LH	As	2012	6	23	4	0	0
LH	As	2012	6	24	5	5	0
LH	As	2012	6	25	5	5	0
LH	As	2012	6	26	7	7	0
LH	As	2012	6	27	4	1	0
LH	As	2012	6	28	3	1	0
LH	As	2012	6	29	2	0	0
LH	As	2012	6	30	2	2	0
LH	As	2012	6	31	6	1	0
LH	As	2012	6	32	6	1	0
LH	As	2012	6	33	5	0	0
LH	As	2012	6	34	5	1	0
LH	As	2012	6	35	8	2	0
LH	As	2012	6	36	7	1	0
LH	As	2012	6	37	6	1	0
LH	As	2012	6	38	6	3	0
LH	As	2012	6	39	5	0	0
LH	As	2012	6	40	5	1	0
LH	As	2012	6	41	7	2	0
LH	As	2012	6	42	3	0	0
LH	As	2012	6	43	6	1	0
LH	As	2012	6	44	6	1	0
LH	As	2012	6	45	5	1	0
LH	As	2012	6	46	7	1	0
LH	As	2012	6	47	4	1	0
LH	As	2012	6	48	6	1	0
LH	As	2012	6	49	4	1	0
LH	As	2012	6	50	5	1	0
LH	As	2012	6	51	7	2	0
LH	As	2012	6	52	8	3	0
LH	As	2012	6	53	5	1	0
LH	As	2012	6	54	4	3	0
LH	As	2012	6	55	7	2	0
LH	As	2012	6	56	9	3	0
LH	As	2012	6	57	6	2	0
LH	As	2012	6	58	6	1	0
LH	As	2012	6	59	6	0	0
LH	As	2012	6	60	5	2	0
LH	As	2012	6	61	8	3	0
LH	As	2012	6	62	8	2	0
LH	As	2012	6	63	6	0	0
LH	As	2012	6	64	6	3	0
LH	As	2012	6	65	5	1	0
LH	As	2012	6	66	8	3	0
LH	As	2012	6	67	4	2	0
LH	As	2012	6	68	5	1	0
LH	As	2012	6	69	6	2	0
LH	As	2012	6	70	6	0	0
LH	As	2012	6	71	8	1	0
LH	As	2012	6	72	5	2	0
LH	As	2012	6	73	6	1	0
LH	As	2012	6	74	6	3	0
LH	As	2012	6	75	6	2	0
LH	As	2012	6	76	9	2	0
LH	As	2012	6	77	4	0	0
LH	As	2012	6	78	7	2	0
LH	As	2012	6	79	4	1	0
LH	As	2012	6	80	5	2	0
LH	As	2012	7	1	11	6	0
LH	As	2012	7	2	12	3	0
LH	As	2012	7	3	11	0	2
LH	As	2012	7	4	10	2	0
LH	As	2012	7	5	10	3	0
LH	As	2012	7	6	12	9	1
LH	As	2012	7	7	9	9	0
LH	As	2012	7	8	12	0	0
LH	As	2012	7	9	11	4	0
LH	As	2012	7	10	10	4	0
LH	As	2012	7	11	10	0	1
LH	As	2012	7	12	10	1	0
LH	As	2012	7	13	6	2	0
LH	As	2012	8	1	8	6	0
LH	As	2012	8	2	8	0	0
LH	As	2012	8	3	11	5	0
LH	As	2012	8	4	10	4	0
LH	As	2012	8	5	11	3	0
LH	As	2012	8	6	10	4	0
LH	As	2012	8	7	7	4	0
LH	As	2012	8	8	9	1	0
LH	As	2012	8	9	8	4	0
LH	As	2012	8	10	11	6	0
LH	As	2012	8	11	13	7	0
LH	As	2012	8	12	6	4	0
LH	As	2012	8	13	6	4	0
LH	As	2012	8	14	10	8	0
LH	As	2012	8	15	9	7	0
LH	As	2012	8	16	9	1	0
LH	As	2012	8	17	13	10	0
LH	As	2012	8	18	9	6	0
LH	As	2012	8	19	6	4	0
LH	As	2012	8	20	13	5	0
LH	As	2012	8	21	11	4	0
LH	As	2012	8	22	9	4	0
LH	As	2012	8	23	11	7	0
LH	As	2012	8	24	9	5	0
LH	As	2012	8	25	10	8	0
LH	As	2012	8	26	12	4	0
LH	As	2012	8	27	12	4	0
LH	As	2012	8	28	6	6	0
LH	As	2012	8	29	9	7	0
LH	As	2012	8	30	11	4	0
LH	As	2012	8	31	6	5	0
LH	As	2012	8	32	12	10	0
LH	As	2012	8	33	11	11	0
LH	As	2012	8	34	11	11	0
LH	As	2012	9	1	11	4	0
LH	As	2012	9	2	12	3	0
LH	As	2012	9	3	11	3	0
LH	As	2012	9	4	9	3	0
LH	As	2012	9	5	10	2	0
LH	As	2012	9	6	10	4	0
LH	As	2012	9	7	9	3	0
LH	As	2012	9	8	9	7	0
LH	As	2012	9	9	11	7	0
LH	As	2012	9	10	11	11	0
LH	As	2012	9	11	12	1	0
LH	As	2012	9	12	12	2	0
LH	As	2012	9	13	12	1	0
LH	As	2012	9	14	11	1	0
LH	As	2012	9	15	9	3	0
LH	As	2012	9	16	11	6	0
LH	As	2012	9	17	12	6	0
LH	As	2012	10	1	11	0	0
LH	As	2012	10	2	9	0	0
LH	As	2012	10	3	8	3	0
LH	As	2012	10	4	10	2	0
LH	As	2012	10	5	9	1	0
LH	As	2012	10	6	9	5	0
LH	As	2012	10	7	6	1	0
LH	As	2012	10	8	8	1	0
LH	As	2012	10	9	9	2	0
LH	As	2012	10	10	11	0	0
LH	As	2012	10	11	8	1	0
LH	As	2012	10	12	11	3	0
LH	As	2012	10	13	11	0	0
LH	As	2012	10	14	7	2	0
LH	As	2012	10	15	7	0	0
LH	As	2012	10	16	10	3	0
LH	As	2012	10	17	6	3	0
LH	As	2012	10	18	11	3	0
LH	As	2012	10	19	9	2	0
LH	As	2012	10	20	6	2	0
LH	As	2012	10	21	11	2	0
LH	As	2012	10	22	8	5	0
LH	As	2012	10	23	10	5	0
LH	As	2012	10	24	10	3	0
LH	As	2012	10	25	8	0	0
LH	As	2012	10	26	11	4	0
LH	As	2012	10	27	8	4	0
LH	As	2012	10	28	9	2	0
LH	As	2012	10	29	10	5	0
LH	As	2012	10	30	11	6	0
LH	As	2012	11	1	11	2	0
LH	As	2012	11	2	9	3	0
LH	As	2012	11	3	9	4	0
LH	As	2012	11	4	9	3	0
LH	As	2012	11	5	10	3	0
LH	As	2012	11	6	10	2	0
LH	As	2012	11	7	9	5	0
LH	As	2012	11	8	10	0	1
LH	As	2012	11	9	10	2	0
LH	As	2012	11	10	10	1	1
LH	As	2012	11	11	11	1	0
LH	As	2012	11	12	10	3	0
LH	As	2012	11	13	8	3	0
LH	As	2012	11	14	10	3	1
LH	As	2012	11	15	9	1	0
LH	As	2012	11	16	10	5	0
LH	As	2012	11	17	10	1	0
LH	As	2012	11	18	10	1	0
LH	As	2012	11	19	9	1	0
LH	As	2012	11	20	9	3	0
LH	As	2012	11	21	10	1	0
LH	As	2012	11	22	9	2	0
LH	As	2012	11	23	11	1	0
LH	As	2012	11	24	9	1	0
LH	As	2012	11	25	10	4	0
LH	As	2012	11	26	11	7	0
LH	As	2012	11	27	9	0	0
LH	As	2012	11	28	9	3	1
LH	As	2012	11	29	10	2	1
LH	As	2012	11	30	9	5	0
LH	As	2012	11	31	8	5	0
LH	As	2012	11	32	10	1	0
LH	As	2012	11	33	9	2	0
LH	As	2012	11	34	10	2	0
LH	As	2012	11	35	10	2	0
LH	As	2012	11	36	8	2	0
LH	As	2012	11	37	9	3	0
LH	As	2012	11	38	10	2	0
LH	As	2012	11	39	8	2	0
LH	As	2012	11	40	8	2	1
LH	As	2012	11	41	8	3	0
LH	As	2012	11	42	9	0	0
LH	As	2012	11	43	9	0	0
LH	As	2012	11	44	9	1	0
LH	As	2012	11	45	10	1	0
LH	As	2012	11	46	9	2	0
LH	As	2012	11	47	9	1	0
LH	As	2012	11	48	10	2	0
LH	As	2012	11	49	9	4	0
LH	As	2012	11	50	9	2	0
LH	As	2012	11	51	9	0	0
LH	As	2012	11	52	7	0	0
LH	As	2012	11	53	9	7	0
LH	As	2012	11	54	8	1	0
LH	As	2012	11	55	6	3	0
LH	As	2012	11	56	9	1	0
LH	As	2012	11	57	10	2	0
LH	As	2012	11	58	9	1	0
LH	As	2012	11	59	8	0	0
LH	As	2012	11	60	10	2	0
LH	As	2012	11	61	9	1	0
LH	As	2012	11	62	10	2	0
LH	As	2012	11	63	8	1	0
LH	As	2012	11	64	11	3	0
LH	As	2012	11	65	10	1	0
LH	As	2012	11	66	10	2	0
LH	As	2012	11	67	8	3	0
LH	As	2012	11	68	9	7	0
LH	As	2012	11	69	7	5	0
LH	As	2012	11	70	10	0	0
LH	As	2012	11	71	9	4	0
LH	As	2012	11	72	11	3	0
LH	As	2012	11	73	11	5	0
LH	As	2012	11	74	10	2	0
LH	As	2012	11	75	10	2	0
LH	As	2012	11	76	11	5	0
LH	As	2012	11	77	10	2	0
LH	As	2012	11	78	9	2	0
LH	As	2012	11	79	10	5	0
LH	As	2012	11	80	10	6	0
LH	As	2012	11	81	9	1	0
LH	As	2012	11	82	9	3	0
LH	As	2012	11	83	10	1	0
LH	As	2012	11	84	10	0	0
LH	As	2012	11	85	10	0	0
LH	As	2012	11	86	8	2	0
LH	As	2012	11	87	10	2	0
LH	As	2012	11	88	10	2	0
LH	As	2012	11	89	10	0	0
LH	As	2012	11	90	10	1	0
LH	As	2012	12	1	4	0	0
LH	As	2012	12	2	8	0	0
LH	As	2012	12	3	6	0	0
LH	As	2012	12	4	5	5	0
LH	As	2012	12	5	4	1	0
LH	As	2012	12	6	6	1	0
LH	As	2012	12	7	8	3	0
LH	As	2012	12	8	7	2	0
LH	As	2012	12	9	8	0	0
LH	As	2012	12	10	8	7	0
LH	As	2012	12	11	7	5	0
LH	As	2012	12	12	6	2	0
LH	As	2012	12	13	9	0	0
LH	As	2012	12	14	5	5	0
LH	As	2012	13	1	9	5	0
LH	As	2012	13	2	9	6	0
LH	As	2012	13	3	7	6	0
LH	As	2012	14	1	9	0	0
LH	As	2012	14	2	8	2	0
LH	As	2012	14	3	7	0	0
LH	As	2012	14	4	10	1	0
LH	As	2012	14	5	10	4	0
LH	As	2012	14	6	8	1	0
LH	As	2012	14	7	10	1	0
LH	As	2012	14	8	8	1	0
LH	As	2012	14	9	11	1	0
LH	As	2012	14	10	8	0	0
LH	As	2012	14	11	11	0	0
LH	As	2012	14	12	12	0	0
LH	As	2012	14	13	8	1	0
LH	As	2012	14	14	8	0	0
LH	As	2012	14	15	9	3	0
LH	As	2012	14	16	10	0	0
LH	As	2012	14	17	8	0	0
LH	As	2012	14	18	9	0	0
LH	As	2012	14	19	9	1	0
LH	As	2012	14	20	9	1	0
LH	As	2012	14	21	8	1	1
LH	As	2012	14	22	8	1	0
LH	As	2012	14	23	9	0	0
LH	As	2012	14	24	10	1	0
LH	As	2012	14	25	8	2	0
LH	As	2012	14	26	9	2	0
LH	As	2012	14	27	8	0	0
LH	As	2012	14	28	9	1	0
LH	As	2012	14	29	11	2	0
LH	As	2012	14	30	9	1	0
LH	As	2012	14	31	6	0	0
LH	As	2012	14	32	8	1	0
LH	As	2012	14	33	9	0	0
LH	As	2012	14	34	8	0	0
LH	As	2012	14	35	6	0	0
LH	As	2012	14	36	8	2	0
LH	As	2012	14	37	7	0	0
LH	As	2012	14	38	10	1	0
LH	As	2012	14	39	6	0	0
LH	As	2012	14	40	8	2	0
LH	As	2012	14	41	8	1	0
LH	As	2012	14	42	7	0	0
LH	As	2012	14	43	6	0	0
LH	As	2012	14	44	9	1	0
LH	As	2012	14	45	11	0	0
LH	As	2012	14	46	10	0	0
LH	As	2012	14	47	10	0	0
LH	As	2012	14	48	10	1	0
LH	As	2012	14	49	9	0	0
LH	As	2012	14	50	10	3	0
LH	As	2012	14	51	5	0	0
LH	As	2012	14	52	10	1	0
LH	As	2012	14	53	9	3	0
LH	As	2012	14	54	10	2	0
LH	As	2012	14	55	9	2	0
LH	As	2012	14	56	8	2	0
LH	As	2012	14	57	10	0	0
LH	As	2012	14	58	10	0	0
LH	As	2012	14	59	9	3	0
LH	As	2012	14	60	5	0	0
LH	As	2012	14	61	8	0	0
LH	As	2012	14	62	11	1	0
LH	As	2012	14	63	10	1	0
LH	As	2012	14	64	8	0	0
LH	As	2012	14	65	10	3	0
LH	As	2012	14	66	4	0	0
LH	As	2012	14	67	10	1	0
LH	As	2012	14	68	9	1	0
LH	As	2012	14	69	10	2	1
LH	As	2012	15	1	12	8	0
LH	As	2012	15	2	10	4	0
LH	As	2012	15	3	9	5	0
LH	As	2012	15	4	7	4	0
LH	As	2012	15	5	11	2	0
LH	As	2012	15	6	10	2	0
LH	As	2012	15	7	10	3	0
LH	As	2012	15	8	10	1	0
LH	As	2012	15	9	10	3	0
LH	As	2012	15	10	9	1	0
LH	As	2012	15	11	10	3	0
LH	As	2012	15	12	8	2	0
LH	As	2012	15	13	9	4	0
LH	As	2012	15	14	9	4	0
LH	As	2012	15	15	9	7	0
LH	As	2012	15	16	8	4	0
LH	As	2012	15	17	12	5	0
LH	As	2012	15	18	8	5	0
LH	As	2012	15	19	10	8	0
LH	As	2012	15	20	8	5	0
LH	As	2012	15	21	9	7	0
LH	As	2012	15	22	12	8	1
LH	As	2012	15	23	9	7	0
LH	As	2012	15	24	8	4	0
LH	As	2012	15	25	10	0	0
LH	As	2012	15	26	10	2	0
LH	As	2012	15	27	10	9	0
LH	As	2012	15	28	8	0	0
LH	As	2012	15	29	9	3	0
LH	As	2012	15	30	12	10	0
LH	As	2012	15	31	8	7	0
LH	As	2012	15	32	9	3	0
LH	As	2012	15	33	9	3	0
LH	As	2012	15	34	9	2	0
LH	As	2012	15	35	11	1	0
LH	As	2012	15	36	10	2	1
LH	As	2012	15	37	8	6	0
LH	As	2012	15	38	7	5	0
LH	As	2012	15	39	10	4	0
LH	As	2012	15	40	9	4	0
LH	As	2012	15	41	8	4	0
LH	As	2012	15	42	10	1	0
LH	As	2012	15	43	9	1	0
LH	As	2012	15	44	10	7	0
LH	As	2012	15	45	8	2	0
LH	As	2012	15	46	8	3	0
LH	As	2012	15	47	9	3	0
LH	As	2012	15	48	9	4	0
LH	As	2012	15	49	10	1	0
LH	As	2012	15	50	8	2	0
LH	As	2012	15	51	10	2	0
LH	As	2012	15	52	9	1	0
LH	As	2012	15	53	10	10	0
LH	As	2012	15	54	6	2	0
LH	As	2012	15	55	8	7	0
LH	As	2012	15	56	11	1	0
LH	As	2012	15	57	7	4	0
LH	As	2012	15	58	9	2	0
LH	As	2012	15	59	8	3	0
LH	As	2012	15	60	7	3	0
LH	As	2012	15	61	8	2	0
LH	As	2012	15	62	11	1	0
LH	As	2012	15	63	9	1	0
LH	As	2012	15	64	10	7	0
LH	As	2012	15	65	7	3	0
LH	As	2012	15	66	9	5	0
LH	As	2012	15	67	8	6	0
LH	As	2012	15	68	8	7	0
LM	As	2012	1	1	11	0	0
LM	As	2012	1	2	10	0	0
LM	As	2012	1	3	11	2	1
LM	As	2012	1	4	9	2	1
LM	As	2012	1	5	10	1	0
LM	As	2012	1	6	9	1	1
LM	As	2012	1	7	10	1	0
LM	As	2012	1	8	9	1	3
LM	As	2012	1	9	10	0	0
LM	As	2012	1	10	10	2	0
LM	As	2012	1	11	10	4	0
LM	As	2012	1	12	5	0	0
LM	As	2012	1	13	7	3	0
LM	As	2012	1	14	8	3	0
LM	As	2012	1	15	8	1	0
LM	As	2012	1	16	9	2	0
LM	As	2012	1	17	8	4	1
LM	As	2012	1	18	9	2	0
LM	As	2012	1	19	11	2	1
LM	As	2012	1	20	9	3	0
LM	As	2012	1	21	11	1	0
LM	As	2012	1	22	9	0	0
LM	As	2012	1	23	9	1	0
LM	As	2012	1	24	8	3	0
LM	As	2012	1	25	10	3	0
LM	As	2012	1	26	10	1	0
LM	As	2012	1	27	10	2	0
LM	As	2012	1	28	10	3	0
LM	As	2012	1	29	9	3	0
LM	As	2012	1	30	12	2	2
LM	As	2012	1	31	10	1	0
LM	As	2012	1	32	9	0	0
LM	As	2012	1	33	9	0	4
LM	As	2012	1	34	9	2	1
LM	As	2012	1	35	7	4	0
LM	As	2012	1	36	9	3	1
LM	As	2012	1	37	5	0	0
LM	As	2012	1	38	9	1	1
LM	As	2012	1	39	10	1	0
LM	As	2012	1	40	10	2	0
LM	As	2012	1	41	11	2	0
LM	As	2012	1	42	9	1	1
LM	As	2012	1	43	10	0	0
LM	As	2012	1	44	10	2	0
LM	As	2012	1	45	9	0	0
LM	As	2012	1	46	10	0	1
LM	As	2012	1	47	7	0	0
LM	As	2012	1	48	7	0	0
LM	As	2012	1	49	8	0	0
LM	As	2012	1	50	8	0	4
LM	As	2012	1	51	8	0	0
LM	As	2012	2	1	7	1	0
LM	As	2012	2	2	8	0	0
LM	As	2012	2	3	10	2	1
LM	As	2012	2	4	3	0	0
LM	As	2012	2	5	7	3	0
LM	As	2012	2	6	7	0	0
LM	As	2012	2	7	11	2	0
LM	As	2012	2	8	4	0	0
LM	As	2012	2	9	7	1	0
LM	As	2012	2	10	9	1	0
LM	As	2012	2	11	5	2	0
LM	As	2012	2	12	11	2	0
LM	As	2012	2	13	6	1	1
LM	As	2012	2	14	9	3	0
LM	As	2012	2	15	7	1	1
LM	As	2012	2	16	3	0	0
LM	As	2012	2	17	6	1	1
LM	As	2012	2	18	7	0	1
LM	As	2012	2	19	9	1	0
LM	As	2012	2	20	7	1	0
LM	As	2012	2	21	7	0	0
LM	As	2012	2	22	10	0	0
LM	As	2012	2	23	4	0	0
LM	As	2012	2	24	4	1	0
LM	As	2012	2	25	7	0	1
LM	As	2012	2	26	4	3	0
LM	As	2012	2	27	3	2	1
LM	As	2012	2	28	6	1	0
LM	As	2012	2	29	4	0	1
LM	As	2012	2	30	7	0	1
LM	As	2012	2	31	6	0	0
LM	As	2012	2	32	7	1	0
LM	As	2012	2	33	8	1	0
LM	As	2012	2	34	11	2	0
LM	As	2012	2	35	6	2	0
LM	As	2012	2	36	5	1	0
LM	As	2012	2	37	9	1	0
LM	As	2012	2	38	4	1	0
LM	As	2012	2	39	5	0	0
LM	As	2012	2	40	6	2	0
LM	As	2012	2	41	1	0	1
LM	As	2012	2	42	4	0	0
LM	As	2012	2	43	6	2	0
LM	As	2012	3	1	6	1	0
LM	As	2012	3	2	8	4	0
LM	As	2012	3	3	9	2	0
LM	As	2012	3	4	11	0	0
LM	As	2012	3	5	6	1	0
LM	As	2012	3	6	9	2	0
LM	As	2012	3	7	5	0	0
LM	As	2012	3	8	7	5	0
LM	As	2012	3	9	10	0	1
LM	As	2012	3	10	6	1	0
LM	As	2012	3	11	6	0	0
LM	As	2012	3	12	6	3	0
LM	As	2012	3	13	6	0	0
LM	As	2012	3	14	6	1	0
LM	As	2012	3	15	5	0	0
LM	As	2012	3	16	5	2	0
LM	As	2012	3	17	7	2	0
LM	As	2012	3	18	7	2	0
LM	As	2012	3	19	6	1	0
LM	As	2012	4	1	10	1	0
LM	As	2012	4	2	11	1	0
LM	As	2012	4	3	10	0	0
LM	As	2012	4	4	8	2	0
LM	As	2012	4	5	8	1	0
LM	As	2012	4	6	10	4	0
LM	As	2012	4	7	8	2	0
LM	As	2012	4	8	8	2	0
LM	As	2012	4	9	10	1	0
LM	As	2012	4	10	8	2	0
LM	As	2012	5	1	11	5	0
LM	As	2012	6	1	6	4	0
LM	As	2012	6	2	6	1	0
LM	As	2012	6	3	9	0	0
LM	As	2012	6	4	9	1	1
LM	As	2012	6	5	13	0	0
LM	As	2012	6	6	11	0	0
LM	As	2012	6	7	10	2	0
LM	As	2012	7	1	12	4	0
LM	As	2012	7	2	11	1	0
LM	As	2012	7	3	11	3	0
LM	As	2012	7	4	8	0	0
LM	As	2012	7	5	11	2	0
LM	As	2012	7	6	13	0	0
LM	As	2012	7	7	8	5	0
LM	As	2012	7	8	7	4	0
LM	As	2012	7	9	11	4	0
LM	As	2012	7	10	10	0	0
LM	As	2012	7	11	11	2	0
LM	As	2012	7	12	12	4	0
LM	As	2012	7	13	12	3	0
LM	As	2012	7	14	9	6	0
LM	As	2012	7	15	11	3	0
LM	As	2012	7	16	11	1	1
LM	As	2012	7	17	12	2	0
LM	As	2012	7	18	11	3	0
LM	As	2012	7	19	11	0	0
LM	As	2012	7	20	12	1	0
LM	As	2012	7	21	11	0	0
LM	As	2012	7	22	12	1	0
LM	As	2012	7	23	8	0	1
LM	As	2012	7	24	9	0	0
LM	As	2012	7	25	12	4	0
LM	As	2012	7	26	7	0	0
LM	As	2012	7	27	11	0	0
LM	As	2012	7	28	11	0	0
LM	As	2012	7	29	11	0	0
LM	As	2012	7	30	12	0	1
LM	As	2012	7	31	11	4	0
LM	As	2012	7	32	10	1	0
LM	As	2012	7	33	12	1	0
LM	As	2012	7	34	11	0	1
LM	As	2012	7	35	12	2	0
LM	As	2012	7	36	9	6	0
LM	As	2012	7	37	11	2	1
LM	As	2012	7	38	11	1	0
LM	As	2012	7	39	11	2	0
LM	As	2012	7	40	10	0	0
LM	As	2012	7	41	10	4	0
LM	As	2012	7	42	11	2	0
LM	As	2012	7	43	11	5	0
LM	As	2012	7	44	11	0	0
LM	As	2012	7	45	9	2	0
LM	As	2012	7	46	11	1	0
LM	As	2012	7	47	11	1	1
LM	As	2012	7	48	13	5	0
LM	As	2012	7	49	10	0	0
LM	As	2012	7	50	12	2	0
LM	As	2012	8	1	11	1	0
LM	As	2012	8	2	10	1	0
LM	As	2012	8	3	9	0	0
LM	As	2012	8	4	8	0	0
LM	As	2012	8	5	11	1	0
LM	As	2012	8	6	8	2	0
LM	As	2012	8	7	9	3	0
LM	As	2012	8	8	13	0	0
LM	As	2012	8	9	12	1	0
LM	As	2012	8	10	5	1	0
LM	As	2012	8	11	3	0	0
LM	As	2012	8	12	10	1	0
LM	As	2012	8	13	6	4	0
LM	As	2012	8	14	12	0	0
LM	As	2012	8	15	6	0	0
LM	As	2012	8	16	10	0	1
LM	As	2012	8	17	12	1	0
LM	As	2012	8	18	13	3	1
LM	As	2012	9	1	8	0	0
LM	As	2012	9	2	6	4	0
LM	As	2012	9	3	5	2	0
LM	As	2012	9	4	9	3	0
LM	As	2012	9	5	8	2	0
LM	As	2012	9	6	5	0	0
LM	As	2012	9	7	8	1	0
LM	As	2012	9	8	5	1	0
LM	As	2012	9	9	8	2	0
LM	As	2012	9	10	6	4	0
LM	As	2012	9	11	8	3	1
LM	As	2012	10	1	10	1	3
LM	As	2012	10	2	10	1	0
LM	As	2012	10	3	8	1	1
LM	As	2012	10	4	6	1	1
LM	As	2012	10	5	10	1	3
LM	As	2012	10	6	4	1	0
LM	As	2012	10	7	4	1	1
LM	As	2012	10	8	10	3	3
LM	As	2012	10	9	3	1	1
LM	As	2012	10	10	5	2	1
LM	As	2012	10	11	7	1	0
LM	As	2012	10	12	5	0	1
LM	As	2012	11	1	10	3	0
LM	As	2012	11	2	8	0	0
LM	As	2012	11	3	9	1	0
LM	As	2012	11	4	7	2	0
LM	As	2012	11	5	8	3	1
LM	As	2012	11	6	5	0	0
LM	As	2012	11	7	5	1	0
LM	As	2012	11	8	8	0	0
LM	As	2012	11	9	9	1	0
LM	As	2012	11	10	10	4	0
LM	As	2012	11	11	8	1	0
LM	As	2012	11	12	8	3	0
LM	As	2012	11	13	8	1	0
LM	As	2012	11	14	7	1	0
LM	As	2012	11	15	8	0	0
LM	As	2012	11	16	7	2	0
LM	As	2012	11	17	7	3	0
LM	As	2012	11	18	8	3	0
LM	As	2012	11	19	8	1	0
LM	As	2012	11	20	9	1	0
LM	As	2012	11	21	9	0	0
LM	As	2012	11	22	8	1	0
LM	As	2012	11	23	10	3	0
LM	As	2012	11	24	10	1	0
LM	As	2012	11	25	11	0	0
LM	As	2012	11	26	10	1	0
LM	As	2012	11	27	9	1	0
LM	As	2012	11	28	9	2	0
LM	As	2012	11	29	7	2	0
LM	As	2012	11	30	7	1	0
LM	As	2012	11	31	7	0	0
LM	As	2012	11	32	5	0	0
LM	As	2012	11	33	9	5	0
LM	As	2012	11	34	7	0	0
LM	As	2012	11	35	8	2	0
LM	As	2012	11	36	7	1	0
LM	As	2012	11	37	9	2	0
LM	As	2012	11	38	8	0	0
LM	As	2012	11	39	9	1	0
LM	As	2012	11	40	11	2	0
LM	As	2012	11	41	9	0	0
LM	As	2012	11	42	9	2	0
LM	As	2012	11	43	8	0	0
LM	As	2012	11	44	9	1	0
LM	As	2012	11	45	11	1	0
LM	As	2012	11	46	11	0	0
LM	As	2012	11	47	10	3	1
LM	As	2012	11	48	10	2	0
LM	As	2012	11	49	7	1	0
LM	As	2012	11	50	7	1	0
LM	As	2012	11	51	7	0	0
LM	As	2012	12	1	10	5	0
LM	As	2012	12	2	9	0	0
LM	As	2012	12	3	9	2	1
LM	As	2012	12	4	9	7	0
LM	As	2012	13	1	13	4	2
LM	As	2012	13	2	12	2	1
LM	As	2012	13	3	15	1	0
LM	As	2012	13	4	9	1	0
LM	As	2012	13	5	12	2	2
LM	As	2012	13	6	12	0	3
LM	As	2012	13	7	12	2	0
LM	As	2012	13	8	13	2	0
LM	As	2012	13	9	13	0	1
LM	As	2012	13	10	11	1	0
LM	As	2012	13	11	11	1	0
LM	As	2012	13	12	12	0	0
LM	As	2012	13	13	13	2	1
LM	As	2012	13	14	13	8	0
LM	As	2012	13	15	10	0	2
LM	As	2012	13	16	12	2	3
LM	As	2012	13	17	12	1	1
LM	As	2012	13	18	11	1	0
LM	As	2012	13	19	12	0	0
LM	As	2012	13	20	10	7	0
LM	As	2012	13	21	13	11	0
LM	As	2012	13	22	12	3	1
LM	As	2012	13	23	10	0	0
LM	As	2012	13	24	11	0	0
LM	As	2012	13	25	11	0	1
LM	As	2012	13	26	13	8	1
LM	As	2012	13	27	12	1	0
LM	As	2012	13	28	10	1	0
LM	As	2012	13	29	11	4	1
LM	As	2012	13	30	10	1	0
LM	As	2012	13	31	13	1	0
LM	As	2012	13	32	12	0	0
LM	As	2012	13	33	12	0	2
LM	As	2012	13	34	12	0	0
LM	As	2012	13	35	11	0	2
LM	As	2012	13	36	9	4	0
LM	As	2012	13	37	7	0	0
LM	As	2012	13	38	9	0	1
LM	As	2012	13	39	10	1	3
LM	As	2012	13	40	14	7	2
LM	As	2012	13	41	10	0	0
LM	As	2012	13	42	9	0	1
LM	As	2012	13	43	11	0	0
LM	As	2012	13	44	9	2	0
LM	As	2012	13	45	10	0	0
LM	As	2012	13	46	10	2	1
LM	As	2012	13	47	13	0	2
LM	As	2012	13	48	9	2	2
LM	As	2012	13	49	10	2	1
LM	As	2012	13	50	12	1	1
LM	As	2012	14	1	8	2	1
LM	As	2012	14	2	11	1	1
LM	As	2012	14	3	10	6	1
LM	As	2012	14	4	9	1	0
LM	As	2012	14	5	9	1	0
LM	As	2012	14	6	12	2	0
LM	As	2012	14	7	7	0	0
LM	As	2012	14	8	7	2	0
LM	As	2012	14	9	10	2	0
LM	As	2012	14	10	9	1	0
LM	As	2012	14	11	9	2	0
LM	As	2012	14	12	7	1	0
LM	As	2012	14	13	10	1	1
LM	As	2012	14	14	7	1	0
LM	As	2012	14	15	8	3	0
LM	As	2012	14	16	12	1	0
LM	As	2012	14	17	10	4	0
LM	As	2012	14	18	8	0	1
LM	As	2012	14	19	6	1	0
LM	As	2012	14	20	7	0	0
LM	As	2012	14	21	10	0	1
LM	As	2012	14	22	11	1	3
LM	As	2012	14	23	9	1	1
LM	As	2012	14	24	11	2	1
LM	As	2012	14	25	5	0	0
LM	As	2012	14	26	7	2	0
LM	As	2012	14	27	7	0	0
LM	As	2012	14	28	8	3	0
LM	As	2012	14	29	9	1	0
LM	As	2012	14	30	10	3	0
LM	As	2012	14	31	9	0	1
LM	As	2012	14	32	7	0	1
LM	As	2012	14	33	9	1	0
LM	As	2012	14	34	9	1	1
LM	As	2012	14	35	10	4	0
LM	As	2012	14	36	12	0	0
LM	As	2012	14	37	7	2	0
LM	As	2012	14	38	9	2	1
LM	As	2012	14	39	6	1	1
LM	As	2012	14	40	7	3	0
LM	As	2012	14	41	11	2	1
LM	As	2012	14	42	9	1	0
LM	As	2012	14	43	12	2	0
LM	As	2012	14	44	7	1	0
LM	As	2012	14	45	7	0	0
LM	As	2012	14	46	7	2	0
LM	As	2012	14	47	11	0	0
LM	As	2012	14	48	10	3	0
LM	As	2012	14	49	9	1	1
LM	As	2012	14	50	9	2	0
LM	As	2012	15	1	4	1	0
LM	As	2012	15	2	13	4	0
LM	As	2012	15	3	8	4	0
LM	As	2012	15	4	8	3	0
LM	As	2012	15	5	6	4	0
LM	As	2012	15	6	11	6	2
LM	As	2012	15	7	6	1	0
LM	As	2012	15	8	6	2	1
LM	As	2012	15	9	8	3	1
LM	As	2012	15	10	12	2	0
LM	As	2012	15	11	7	1	0
LM	As	2012	15	12	8	2	0
LM	As	2012	15	13	5	1	0
LM	As	2012	15	14	10	3	0
LM	As	2012	15	15	13	4	0
LM	As	2012	15	16	9	3	0
LM	As	2012	15	17	11	4	0
LM	As	2012	15	18	13	1	0
LM	As	2012	15	19	12	9	1
LM	As	2012	15	20	6	2	0
LM	As	2012	15	21	10	3	0
LM	As	2012	15	22	6	1	0
LM	As	2012	15	23	12	11	0
PN	As	2012	1	1	9	3	0
PN	As	2012	1	2	11	1	0
PN	As	2012	1	3	9	3	0
PN	As	2012	1	4	12	1	0
PN	As	2012	1	5	10	1	0
PN	As	2012	1	6	9	1	0
PN	As	2012	1	7	5	0	0
PN	As	2012	1	8	11	10	0
PN	As	2012	1	9	5	4	0
PN	As	2012	1	10	8	7	0
PN	As	2012	1	11	7	6	0
PN	As	2012	1	12	10	10	0
PN	As	2012	2	1	11	10	0
PN	As	2012	2	2	10	2	0
PN	As	2012	2	3	10	5	0
PN	As	2012	2	4	9	3	0
PN	As	2012	2	5	7	2	0
PN	As	2012	2	6	10	6	0
PN	As	2012	2	7	8	2	0
PN	As	2012	2	8	10	3	1
PN	As	2012	2	9	9	1	1
PN	As	2012	2	10	10	6	0
PN	As	2012	2	11	7	4	0
PN	As	2012	2	12	10	3	1
PN	As	2012	2	13	10	8	0
PN	As	2012	2	14	9	3	0
PN	As	2012	2	15	6	2	0
PN	As	2012	2	16	8	4	0
PN	As	2012	2	17	8	3	1
PN	As	2012	2	18	9	1	0
PN	As	2012	2	19	11	8	0
PN	As	2012	2	20	7	7	0
PN	As	2012	2	21	6	1	0
PN	As	2012	2	22	8	5	0
PN	As	2012	2	23	8	3	0
PN	As	2012	2	24	9	6	0
PN	As	2012	2	25	9	9	0
PN	As	2012	2	26	8	5	0
PN	As	2012	2	27	11	9	0
PN	As	2012	2	28	5	2	0
PN	As	2012	2	29	8	2	0
PN	As	2012	2	30	7	5	0
PN	As	2012	2	31	9	7	0
PN	As	2012	2	32	9	6	0
PN	As	2012	2	33	10	7	0
PN	As	2012	2	34	8	2	0
PN	As	2012	2	35	9	2	0
PN	As	2012	2	36	8	3	0
PN	As	2012	2	37	7	4	0
PN	As	2012	2	38	6	4	0
PN	As	2012	2	39	10	5	0
PN	As	2012	2	40	11	8	0
PN	As	2012	2	41	9	6	0
PN	As	2012	2	42	10	6	1
PN	As	2012	2	43	8	8	0
PN	As	2012	2	44	6	3	0
PN	As	2012	2	45	8	2	0
PN	As	2012	2	46	8	3	0
PN	As	2012	2	47	9	5	0
PN	As	2012	2	48	9	7	0
PN	As	2012	2	49	8	4	0
PN	As	2012	2	50	9	7	0
PN	As	2012	3	1	9	2	1
PN	As	2012	3	2	10	2	1
PN	As	2012	3	3	12	3	0
PN	As	2012	3	4	10	4	0
PN	As	2012	3	5	8	3	1
PN	As	2012	3	6	6	5	0
PN	As	2012	3	7	10	3	0
PN	As	2012	3	8	7	1	0
PN	As	2012	3	9	11	3	1
PN	As	2012	3	10	12	2	0
PN	As	2012	3	11	10	3	0
PN	As	2012	3	12	11	5	0
PN	As	2012	3	13	12	3	0
PN	As	2012	3	14	12	1	0
PN	As	2012	3	15	11	3	0
PN	As	2012	3	16	10	4	0
PN	As	2012	3	17	11	4	0
PN	As	2012	3	18	12	2	0
PN	As	2012	3	19	10	2	0
PN	As	2012	3	20	12	2	0
PN	As	2012	3	21	9	0	0
PN	As	2012	3	22	10	2	0
PN	As	2012	3	23	10	2	0
PN	As	2012	3	24	9	3	0
PN	As	2012	3	25	8	6	0
PN	As	2012	3	26	7	3	0
PN	As	2012	3	27	10	6	0
PN	As	2012	3	28	9	4	0
PN	As	2012	3	29	8	3	0
PN	As	2012	3	30	11	6	0
PN	As	2012	4	1	10	3	0
PN	As	2012	4	2	9	3	0
PN	As	2012	4	3	9	1	0
PN	As	2012	4	4	9	3	0
PN	As	2012	4	5	10	0	0
PN	As	2012	4	6	9	6	0
PN	As	2012	4	7	8	7	0
PN	As	2012	5	1	9	1	1
PN	As	2012	5	2	7	2	0
PN	As	2012	5	3	11	9	0
PN	As	2012	5	4	9	3	0
PN	As	2012	5	5	5	2	0
PN	As	2012	5	6	6	2	0
PN	As	2012	5	7	3	0	0
PN	As	2012	5	8	3	1	0
PN	As	2012	6	1	4	1	0
PN	As	2012	6	2	6	1	0
PN	As	2012	6	3	5	1	0
PN	As	2012	6	4	3	1	0
PN	As	2012	7	1	11	2	0
PN	As	2012	7	2	10	7	0
PN	As	2012	7	3	10	3	0
PN	As	2012	7	4	10	3	1
PN	As	2012	7	5	12	7	3
PN	As	2012	7	6	8	4	0
PN	As	2012	7	7	11	7	0
PN	As	2012	7	8	12	6	0
PN	As	2012	7	9	8	4	0
PN	As	2012	7	10	8	2	0
PN	As	2012	7	11	11	6	0
PN	As	2012	7	12	9	7	0
PN	As	2012	7	13	11	7	0
PN	As	2012	7	14	11	3	0
PN	As	2012	7	15	8	5	0
PN	As	2012	7	16	8	5	0
PN	As	2012	7	17	7	5	0
PN	As	2012	7	18	10	9	0
PN	As	2012	7	19	6	4	0
PN	As	2012	8	1	8	7	0
PN	As	2012	8	2	7	6	0
PN	As	2012	8	3	8	2	0
PN	As	2012	8	4	10	5	0
PN	As	2012	8	5	8	2	0
PN	As	2012	8	6	10	4	0
PN	As	2012	8	7	8	6	0
PN	As	2012	8	8	7	7	0
PN	As	2012	8	9	8	1	0
PN	As	2012	8	10	8	4	1
PN	As	2012	8	11	7	2	0
PN	As	2012	8	12	6	3	0
PN	As	2012	8	13	7	3	0
PN	As	2012	8	14	7	4	0
PN	As	2012	8	15	7	1	0
PN	As	2012	8	16	9	3	1
PN	As	2012	8	17	7	2	0
PN	As	2012	8	18	7	3	1
PN	As	2012	8	19	12	7	0
PN	As	2012	8	20	5	3	0
PN	As	2012	8	21	6	4	0
PN	As	2012	8	22	5	1	0
PN	As	2012	8	23	6	4	0
PN	As	2012	8	24	6	3	0
PN	As	2012	8	25	7	4	0
PN	As	2012	8	26	5	3	0
PN	As	2012	8	27	7	4	0
PN	As	2012	8	28	5	3	0
PN	As	2012	8	29	7	5	0
PN	As	2012	8	30	9	5	0
PN	As	2012	8	31	7	1	0
PN	As	2012	8	32	5	4	0
PN	As	2012	8	33	6	3	0
PN	As	2012	8	34	6	3	0
PN	As	2012	8	35	8	2	0
PN	As	2012	8	36	6	3	0
PN	As	2012	8	37	8	4	0
PN	As	2012	8	38	5	2	0
PN	As	2012	8	39	8	2	0
PN	As	2012	8	40	10	1	0
PN	As	2012	8	41	8	3	0
PN	As	2012	8	42	5	2	0
PN	As	2012	8	43	4	2	0
PN	As	2012	8	44	8	4	0
PN	As	2012	8	45	9	4	0
PN	As	2012	8	46	9	4	0
PN	As	2012	8	47	9	3	0
PN	As	2012	8	48	6	4	0
PN	As	2012	8	49	6	3	0
PN	As	2012	8	50	6	2	0
PN	As	2012	9	1	12	8	0
PN	As	2012	9	2	12	5	0
PN	As	2012	9	3	11	4	0
PN	As	2012	9	4	10	3	1
PN	As	2012	9	5	11	3	3
PN	As	2012	9	6	14	4	0
PN	As	2012	9	7	12	4	0
PN	As	2012	9	8	12	6	1
PN	As	2012	9	9	12	3	0
PN	As	2012	9	10	10	4	1
PN	As	2012	9	11	11	8	0
PN	As	2012	9	12	12	8	0
PN	As	2012	9	13	11	7	0
PN	As	2012	9	14	7	2	0
PN	As	2012	9	15	11	1	1
PN	As	2012	9	16	11	5	0
PN	As	2012	9	17	12	7	0
PN	As	2012	9	18	11	3	0
PN	As	2012	9	19	11	5	0
PN	As	2012	9	20	8	2	0
PN	As	2012	9	21	9	3	0
PN	As	2012	9	22	12	4	0
PN	As	2012	9	23	11	2	0
PN	As	2012	9	24	11	1	0
PN	As	2012	9	25	12	3	0
PN	As	2012	9	26	10	4	0
PN	As	2012	9	27	12	3	0
PN	As	2012	9	28	11	5	0
PN	As	2012	9	29	11	1	0
PN	As	2012	9	30	11	4	0
PN	As	2012	9	31	9	3	0
PN	As	2012	9	32	9	1	0
PN	As	2012	9	33	12	3	0
PN	As	2012	9	34	11	0	0
PN	As	2012	9	35	10	6	0
PN	As	2012	9	36	10	2	1
PN	As	2012	9	37	10	2	0
PN	As	2012	9	38	12	4	0
PN	As	2012	9	39	12	4	0
PN	As	2012	9	40	10	2	0
PN	As	2012	9	41	10	4	0
PN	As	2012	9	42	8	2	0
PN	As	2012	9	43	11	5	0
PN	As	2012	9	44	8	2	0
PN	As	2012	9	45	11	8	0
PN	As	2012	9	46	11	3	0
PN	As	2012	9	47	12	7	0
PN	As	2012	9	48	9	2	1
PN	As	2012	9	49	10	6	0
PN	As	2012	9	50	11	7	0
PN	As	2012	10	1	13	7	0
PN	As	2012	10	2	11	2	0
PN	As	2012	10	3	10	5	0
PN	As	2012	10	4	9	3	1
PN	As	2012	10	5	12	2	0
PN	As	2012	10	6	10	2	0
PN	As	2012	10	7	10	5	2
PN	As	2012	10	8	12	2	0
PN	As	2012	10	9	10	1	0
PN	As	2012	10	10	11	1	0
PN	As	2012	10	11	11	1	0
PN	As	2012	10	12	11	0	0
PN	As	2012	10	13	13	1	0
PN	As	2012	10	14	12	3	1
PN	As	2012	10	15	11	0	1
PN	As	2012	10	16	13	2	1
PN	As	2012	10	17	10	1	0
PN	As	2012	10	18	11	2	0
PN	As	2012	10	19	10	2	0
PN	As	2012	10	20	8	0	0
PN	As	2012	10	21	9	1	0
PN	As	2012	10	22	10	4	0
PN	As	2012	10	23	8	4	0
PN	As	2012	10	24	10	2	0
PN	As	2012	10	25	9	2	0
PN	As	2012	10	26	8	0	0
PN	As	2012	10	27	6	1	0
PN	As	2012	10	28	11	8	0
PN	As	2012	10	29	8	4	0
PN	As	2012	10	30	7	4	0
PN	As	2012	10	31	8	7	0
PN	As	2012	10	32	5	4	0
PN	As	2012	11	1	11	2	0
PN	As	2012	11	2	11	1	0
PN	As	2012	11	3	9	9	0
PN	As	2012	11	4	11	5	0
PN	As	2012	11	5	7	3	0
PN	As	2012	11	6	11	2	0
PN	As	2012	11	7	10	8	0
PN	As	2012	11	8	7	2	1
PN	As	2012	11	9	7	4	0
PN	As	2012	11	10	12	1	0
PN	As	2012	11	11	9	3	1
PN	As	2012	11	12	8	4	0
PN	As	2012	11	13	11	4	0
PN	As	2012	11	14	9	3	1
PN	As	2012	11	15	10	3	1
PN	As	2012	11	16	11	6	0
PN	As	2012	11	17	9	3	1
PN	As	2012	11	18	8	3	0
PN	As	2012	11	19	9	5	0
PN	As	2012	11	20	11	3	0
PN	As	2012	11	21	10	2	0
PN	As	2012	11	22	10	2	1
PN	As	2012	11	23	11	3	0
PN	As	2012	11	24	11	5	1
PN	As	2012	11	25	10	5	1
PN	As	2012	11	26	13	3	0
PN	As	2012	11	27	10	5	0
PN	As	2012	11	28	11	1	1
PN	As	2012	11	29	10	4	0
PN	As	2012	11	30	9	2	0
PN	As	2012	11	31	10	0	1
PN	As	2012	11	32	11	4	0
PN	As	2012	11	33	11	5	0
PN	As	2012	11	34	9	3	0
PN	As	2012	11	35	9	1	0
PN	As	2012	11	36	10	1	0
PN	As	2012	11	37	10	3	0
PN	As	2012	11	38	8	1	0
PN	As	2012	11	39	9	3	0
PN	As	2012	11	40	10	2	0
PN	As	2012	11	41	9	2	0
PN	As	2012	11	42	9	4	0
PN	As	2012	11	43	11	2	0
PN	As	2012	11	44	8	4	0
PN	As	2012	11	45	9	4	0
PN	As	2012	11	46	9	3	0
PN	As	2012	12	1	9	4	0
PN	As	2012	12	2	7	1	0
PN	As	2012	12	3	8	1	0
PN	As	2012	12	4	8	1	0
PN	As	2012	12	5	8	0	0
PN	As	2012	12	6	6	6	0
PN	As	2012	12	7	7	7	0
PN	As	2012	13	NA	NA	NA	NA
PN	As	2012	14	1	8	1	0
PN	As	2012	14	2	11	5	2
PN	As	2012	14	3	12	2	0
PN	As	2012	14	4	11	1	1
PN	As	2012	14	5	8	2	0
PN	As	2012	14	6	11	6	0
PN	As	2012	14	7	9	6	0
PN	As	2012	14	8	10	3	0
PN	As	2012	14	9	10	9	0
PN	As	2012	14	10	9	4	0
PN	As	2012	14	11	8	2	0
PN	As	2012	14	12	10	9	0
PN	As	2012	14	13	10	6	0
PN	As	2012	14	14	9	7	0
PN	As	2012	14	15	8	5	0
PN	As	2012	14	16	9	4	0
PN	As	2012	14	17	10	10	0
PN	As	2012	14	18	8	0	0
PN	As	2012	14	19	8	1	1
PN	As	2012	14	20	5	0	0
PN	As	2012	14	21	8	3	0
PN	As	2012	14	22	8	1	1
PN	As	2012	14	23	6	2	0
PN	As	2012	14	24	3	1	0
PN	As	2012	14	25	9	1	0
PN	As	2012	14	26	10	4	2
PN	As	2012	14	27	10	1	0
PN	As	2012	14	28	8	1	0
PN	As	2012	14	29	9	4	0
PN	As	2012	14	30	11	7	2
PN	As	2012	15	1	8	3	0
PN	As	2012	15	2	7	1	0
PN	As	2012	15	3	6	1	0
PN	As	2012	15	4	7	4	0
PN	As	2012	15	5	6	3	0
PN	As	2012	15	6	8	1	0
PN	As	2012	15	7	9	0	0
PN	As	2012	15	8	9	3	0
PN	As	2012	15	9	9	0	0
PN	As	2012	15	10	7	0	0
PN	As	2012	15	11	8	1	0
PN	As	2012	15	12	7	2	0
PN	As	2012	15	13	9	1	0
PN	As	2012	15	14	7	1	0
PN	As	2012	15	15	10	3	0
PN	As	2012	15	16	6	0	0
PN	As	2012	15	17	8	0	0
PN	As	2012	15	18	6	0	0
PN	As	2012	15	19	9	0	0
PN	As	2012	15	20	9	5	0
PN	As	2012	15	21	9	1	0
PN	As	2012	15	22	6	0	0
PN	As	2012	15	23	8	2	0
PN	As	2012	15	24	8	3	0
PN	As	2012	15	25	7	3	0
PN	As	2012	15	26	11	1	1
PN	As	2012	15	27	9	0	0
PN	As	2012	15	28	7	1	0
PN	As	2012	15	29	10	4	0
PN	As	2012	15	30	7	1	0
MR	As	2012	1	1	12	1	0
MR	As	2012	1	2	11	2	0
MR	As	2012	1	3	12	4	0
MR	As	2012	1	4	12	12	0
MR	As	2012	1	5	8	4	1
MR	As	2012	1	6	11	6	0
MR	As	2012	1	7	10	4	1
MR	As	2012	1	8	10	4	1
MR	As	2012	1	9	12	7	0
MR	As	2012	1	10	11	6	2
MR	As	2012	1	11	10	9	0
MR	As	2012	1	12	11	8	0
MR	As	2012	2	1	11	3	0
MR	As	2012	2	2	12	5	1
MR	As	2012	2	3	8	8	0
MR	As	2012	2	4	7	3	0
MR	As	2012	2	5	9	2	0
MR	As	2012	2	6	13	6	0
MR	As	2012	2	7	8	0	0
MR	As	2012	2	8	6	5	0
MR	As	2012	3	1	11	3	2
MR	As	2012	3	2	12	0	0
MR	As	2012	3	3	12	0	0
MR	As	2012	3	4	11	0	0
MR	As	2012	3	5	11	0	0
MR	As	2012	3	6	11	1	0
MR	As	2012	3	7	12	0	0
MR	As	2012	3	8	11	3	0
MR	As	2012	3	9	12	0	2
MR	As	2012	3	10	11	1	1
MR	As	2012	3	11	13	1	1
MR	As	2012	3	12	12	0	0
MR	As	2012	3	13	10	2	0
MR	As	2012	3	14	10	0	0
MR	As	2012	3	15	11	0	0
MR	As	2012	3	16	10	3	0
MR	As	2012	3	17	12	1	1
MR	As	2012	3	18	11	4	0
MR	As	2012	3	19	10	5	0
MR	As	2012	3	20	10	2	0
MR	As	2012	3	21	11	0	0
MR	As	2012	3	22	12	0	2
MR	As	2012	3	23	12	0	1
MR	As	2012	3	24	12	2	1
MR	As	2012	3	25	12	0	0
MR	As	2012	3	26	13	1	2
MR	As	2012	3	27	13	0	2
MR	As	2012	3	28	12	3	0
MR	As	2012	3	29	10	0	1
MR	As	2012	3	30	12	0	0
MR	As	2012	3	31	11	0	0
MR	As	2012	3	32	10	0	0
MR	As	2012	3	33	11	0	0
MR	As	2012	3	34	10	1	1
MR	As	2012	3	35	11	4	0
MR	As	2012	3	36	12	1	0
MR	As	2012	3	37	12	0	0
MR	As	2012	3	38	8	0	0
MR	As	2012	3	39	10	0	0
MR	As	2012	3	40	9	3	0
MR	As	2012	3	41	11	3	1
MR	As	2012	3	42	13	3	0
MR	As	2012	3	43	12	1	0
MR	As	2012	3	44	10	3	1
MR	As	2012	3	45	9	2	0
MR	As	2012	3	46	10	3	2
MR	As	2012	3	47	6	2	0
MR	As	2012	3	48	11	2	0
MR	As	2012	3	49	11	2	0
MR	As	2012	3	50	12	1	2
MR	As	2012	4	1	11	5	0
MR	As	2012	4	2	10	3	1
MR	As	2012	4	3	10	1	0
MR	As	2012	4	4	10	1	3
MR	As	2012	4	5	10	0	0
MR	As	2012	4	6	10	1	3
MR	As	2012	4	7	9	1	0
MR	As	2012	4	8	8	2	2
MR	As	2012	4	9	9	0	2
MR	As	2012	4	10	10	1	2
MR	As	2012	4	11	10	4	1
MR	As	2012	4	12	10	1	3
MR	As	2012	4	13	9	0	1
MR	As	2012	4	14	8	1	0
MR	As	2012	4	15	10	7	0
MR	As	2012	4	16	11	1	2
MR	As	2012	4	17	11	3	2
MR	As	2012	4	18	6	5	0
MR	As	2012	4	19	9	2	0
MR	As	2012	4	20	11	2	2
MR	As	2012	4	21	9	0	0
MR	As	2012	4	22	10	1	1
MR	As	2012	4	23	10	1	0
MR	As	2012	4	24	11	0	0
MR	As	2012	4	25	12	0	1
MR	As	2012	4	26	10	0	0
MR	As	2012	4	27	11	4	0
MR	As	2012	4	28	7	2	0
MR	As	2012	4	29	10	7	0
MR	As	2012	4	30	10	4	0
MR	As	2012	5	1	11	0	0
MR	As	2012	5	2	12	0	0
MR	As	2012	5	3	10	1	0
MR	As	2012	5	4	9	4	0
MR	As	2012	5	5	7	2	0
MR	As	2012	6	1	9	0	0
MR	As	2012	6	2	10	0	0
MR	As	2012	6	3	9	0	1
MR	As	2012	6	4	12	2	0
MR	As	2012	6	5	9	1	0
MR	As	2012	6	6	11	0	1
MR	As	2012	6	7	10	1	0
MR	As	2012	6	8	11	1	0
MR	As	2012	6	9	10	1	0
MR	As	2012	6	10	4	0	0
MR	As	2012	6	11	6	0	0
MR	As	2012	6	12	11	2	0
MR	As	2012	6	13	4	0	0
MR	As	2012	6	14	12	7	0
MR	As	2012	6	15	8	1	0
MR	As	2012	6	16	10	1	0
MR	As	2012	6	17	7	1	0
MR	As	2012	6	18	10	1	0
MR	As	2012	6	19	12	0	0
MR	As	2012	6	20	11	0	0
MR	As	2012	6	21	9	1	0
MR	As	2012	6	22	11	1	0
MR	As	2012	6	23	11	1	0
MR	As	2012	6	24	12	2	0
MR	As	2012	6	25	8	0	0
MR	As	2012	6	26	8	1	0
MR	As	2012	6	27	10	4	0
MR	As	2012	6	28	11	0	0
MR	As	2012	6	29	10	1	0
MR	As	2012	6	30	11	1	0
MR	As	2012	7	NA	NA	NA	NA
MR	As	2012	8	1	12	0	0
MR	As	2012	8	2	12	1	1
MR	As	2012	8	3	10	1	1
MR	As	2012	8	4	9	0	0
MR	As	2012	8	5	11	0	2
MR	As	2012	8	6	10	1	0
MR	As	2012	8	7	11	2	0
MR	As	2012	8	8	12	1	0
MR	As	2012	8	9	10	0	0
MR	As	2012	8	10	9	0	0
MR	As	2012	8	11	12	0	0
MR	As	2012	8	12	11	1	0
MR	As	2012	8	13	12	1	0
MR	As	2012	8	14	11	0	2
MR	As	2012	8	15	8	3	0
MR	As	2012	8	16	9	1	2
MR	As	2012	8	17	11	4	0
MR	As	2012	8	18	11	2	0
MR	As	2012	8	19	9	1	1
MR	As	2012	8	20	11	1	0
MR	As	2012	8	21	12	0	0
MR	As	2012	8	22	11	2	0
MR	As	2012	8	23	12	2	1
MR	As	2012	8	24	12	1	0
MR	As	2012	8	25	11	4	3
MR	As	2012	8	26	12	2	0
MR	As	2012	8	27	11	1	1
MR	As	2012	8	28	11	0	0
MR	As	2012	8	29	12	4	1
MR	As	2012	8	30	8	1	0
MR	As	2012	8	31	10	4	0
MR	As	2012	8	32	11	1	0
MR	As	2012	8	33	13	4	1
MR	As	2012	8	34	13	4	0
MR	As	2012	8	35	12	1	0
MR	As	2012	8	36	12	2	0
MR	As	2012	8	37	11	0	1
MR	As	2012	8	38	9	2	0
MR	As	2012	8	39	11	0	0
MR	As	2012	8	40	12	1	1
MR	As	2012	8	41	8	1	1
MR	As	2012	8	42	10	3	0
MR	As	2012	8	43	13	2	0
MR	As	2012	8	44	12	0	0
MR	As	2012	8	45	11	0	3
MR	As	2012	8	46	13	3	0
MR	As	2012	8	47	11	2	0
MR	As	2012	8	48	12	1	0
MR	As	2012	8	49	12	2	1
MR	As	2012	8	50	9	2	1
MR	As	2012	9	1	10	4	0
MR	As	2012	9	2	10	2	0
MR	As	2012	9	3	11	1	0
MR	As	2012	9	4	10	1	0
MR	As	2012	9	5	11	2	1
MR	As	2012	9	6	11	3	0
MR	As	2012	9	7	9	1	0
MR	As	2012	9	8	10	5	0
MR	As	2012	9	9	11	0	0
MR	As	2012	9	10	10	2	0
MR	As	2012	9	11	10	3	0
MR	As	2012	9	12	11	3	0
MR	As	2012	9	13	10	0	0
MR	As	2012	9	14	11	2	0
MR	As	2012	9	15	11	3	0
MR	As	2012	9	16	10	1	0
MR	As	2012	9	17	11	2	0
MR	As	2012	9	18	10	4	0
MR	As	2012	9	19	11	2	0
MR	As	2012	9	20	10	3	0
MR	As	2012	9	21	11	4	0
MR	As	2012	9	22	12	6	0
MR	As	2012	9	23	11	5	0
MR	As	2012	9	24	12	3	0
MR	As	2012	9	25	12	3	0
MR	As	2012	9	26	10	3	0
MR	As	2012	9	27	9	6	0
MR	As	2012	9	28	11	0	0
MR	As	2012	9	29	11	4	0
MR	As	2012	9	30	10	2	0
MR	As	2012	9	31	11	5	0
MR	As	2012	9	32	10	2	0
MR	As	2012	9	33	10	0	0
MR	As	2012	9	34	9	2	0
MR	As	2012	9	35	10	0	0
MR	As	2012	9	36	11	2	0
MR	As	2012	9	37	10	4	0
MR	As	2012	9	38	11	7	0
MR	As	2012	9	39	12	6	0
MR	As	2012	9	40	11	2	0
MR	As	2012	9	41	12	1	0
MR	As	2012	9	42	10	1	1
MR	As	2012	9	43	11	0	0
MR	As	2012	9	44	11	2	1
MR	As	2012	9	45	11	1	0
MR	As	2012	9	46	10	6	0
MR	As	2012	9	47	11	3	0
MR	As	2012	9	48	11	1	0
MR	As	2012	9	49	12	1	0
MR	As	2012	9	50	11	2	0
MR	As	2012	10	1	11	1	0
MR	As	2012	10	2	12	5	0
MR	As	2012	10	3	10	1	0
MR	As	2012	10	4	11	1	0
MR	As	2012	10	5	8	3	0
MR	As	2012	10	6	10	0	0
MR	As	2012	10	7	12	1	0
MR	As	2012	10	8	7	0	0
MR	As	2012	10	9	11	0	0
MR	As	2012	10	10	11	3	0
MR	As	2012	10	11	9	1	0
MR	As	2012	10	12	10	2	0
MR	As	2012	10	13	9	1	0
MR	As	2012	10	14	11	1	0
MR	As	2012	10	15	9	0	0
MR	As	2012	10	16	9	0	0
MR	As	2012	10	17	12	2	0
MR	As	2012	10	18	10	0	0
MR	As	2012	10	19	9	2	0
MR	As	2012	10	20	7	4	0
MR	As	2012	10	21	11	4	0
MR	As	2012	10	22	11	1	0
MR	As	2012	10	23	6	3	0
MR	As	2012	10	24	8	2	0
MR	As	2012	10	25	10	1	0
MR	As	2012	10	26	10	1	0
MR	As	2012	10	27	8	6	0
MR	As	2012	10	28	9	1	0
MR	As	2012	10	29	7	3	0
MR	As	2012	10	30	11	1	0
MR	As	2012	11	1	9	3	0
MR	As	2012	11	2	13	10	1
MR	As	2012	11	3	11	6	0
MR	As	2012	11	4	10	9	0
MR	As	2012	11	5	12	12	0
MR	As	2012	11	6	11	11	0
MR	As	2012	11	7	10	10	0
MR	As	2012	11	8	12	3	0
MR	As	2012	11	9	12	5	0
MR	As	2012	11	10	12	8	0
MR	As	2012	11	11	12	11	0
MR	As	2012	11	12	12	4	0
MR	As	2012	11	13	12	5	0
MR	As	2012	11	14	11	7	0
MR	As	2012	11	15	13	4	0
MR	As	2012	11	16	12	7	0
MR	As	2012	11	17	11	7	0
MR	As	2012	11	18	11	4	0
MR	As	2012	11	19	12	7	0
MR	As	2012	11	20	11	8	0
MR	As	2012	11	21	12	7	0
MR	As	2012	11	22	11	3	0
MR	As	2012	11	23	11	6	0
MR	As	2012	11	24	11	9	0
MR	As	2012	11	25	12	11	0
MR	As	2012	11	26	11	7	0
MR	As	2012	11	27	11	11	0
MR	As	2012	11	28	12	12	0
MR	As	2012	11	29	11	10	0
MR	As	2012	11	30	12	11	0
MR	As	2012	12	1	12	0	0
MR	As	2012	12	2	10	0	0
MR	As	2012	12	3	8	0	0
MR	As	2012	12	4	11	2	0
MR	As	2012	12	5	10	0	0
MR	As	2012	12	6	12	0	0
MR	As	2012	12	7	10	0	0
MR	As	2012	12	8	11	1	0
MR	As	2012	12	9	11	1	0
MR	As	2012	12	10	10	1	0
MR	As	2012	12	11	11	0	0
MR	As	2012	12	12	12	1	0
MR	As	2012	12	13	9	2	0
MR	As	2012	12	14	9	1	0
MR	As	2012	13	NA	NA	NA	NA
MR	As	2012	14	1	12	2	0
MR	As	2012	14	2	12	5	0
MR	As	2012	14	3	10	3	0
MR	As	2012	14	4	13	3	0
MR	As	2012	14	5	12	1	0
MR	As	2012	14	6	13	1	0
MR	As	2012	14	7	12	2	0
MR	As	2012	14	8	12	1	0
MR	As	2012	14	9	12	1	0
MR	As	2012	14	10	13	6	0
MR	As	2012	14	11	13	6	0
MR	As	2012	14	12	13	2	1
MR	As	2012	14	13	12	2	0
MR	As	2012	14	14	12	2	0
MR	As	2012	14	15	10	1	0
MR	As	2012	14	16	13	2	0
MR	As	2012	14	17	10	1	0
MR	As	2012	14	18	11	4	0
MR	As	2012	14	19	12	3	0
MR	As	2012	14	20	12	8	0
MR	As	2012	14	21	13	0	0
MR	As	2012	14	22	8	3	0
MR	As	2012	14	23	12	6	0
MR	As	2012	14	24	12	7	0
MR	As	2012	14	25	12	4	0
MR	As	2012	14	26	10	6	0
MR	As	2012	14	27	9	2	0
MR	As	2012	14	28	12	3	0
MR	As	2012	14	29	6	2	0
MR	As	2012	14	30	8	3	0
MR	As	2012	15	1	11	4	0
MR	As	2012	15	2	12	7	0
MR	As	2012	15	3	11	6	0
MR	As	2012	15	4	12	6	0
MR	As	2012	15	5	10	3	0
MR	As	2012	15	6	9	4	0
MR	As	2012	15	7	11	5	0
MR	As	2012	15	8	11	4	0
MR	As	2012	15	9	8	5	0
MR	As	2012	15	10	10	4	0
MR	As	2012	15	11	12	4	0
MR	As	2012	15	12	5	2	0
MR	As	2012	15	13	12	7	0
MR	As	2012	15	14	12	8	0
MR	As	2012	15	15	12	2	0
MR	As	2012	15	16	12	6	0
MR	As	2012	15	17	12	3	0
MR	As	2012	15	18	7	1	0
MR	As	2012	15	19	11	8	0
MR	As	2012	15	20	10	5	0
MR	As	2012	15	21	8	3	0
MR	As	2012	15	22	10	8	0
MR	As	2012	15	23	11	9	0
MR	As	2012	15	24	12	7	0
MR	As	2012	15	25	6	1	0
MR	As	2012	15	26	9	5	0
MR	As	2012	15	27	9	4	0
MR	As	2012	15	28	5	1	0
MR	As	2012	15	29	9	7	1
FF	As	2012	1	1	8	8	0
FF	As	2012	1	2	7	2	5
FF	As	2012	1	3	9	7	2
FF	As	2012	1	4	9	4	4
FF	As	2012	1	5	5	4	1
FF	As	2012	1	6	8	4	4
FF	As	2012	1	7	6	1	4
FF	As	2012	1	8	7	5	2
FF	As	2012	1	9	12	11	1
FF	As	2012	1	10	8	2	6
FF	As	2012	1	11	7	1	6
FF	As	2012	1	12	9	1	8
FF	As	2012	1	13	4	1	3
FF	As	2012	1	14	9	3	6
FF	As	2012	1	15	9	3	6
FF	As	2012	1	16	10	2	8
FF	As	2012	1	17	8	4	4
FF	As	2012	1	18	7	3	4
FF	As	2012	1	19	10	3	7
FF	As	2012	1	20	6	2	4
FF	As	2012	1	21	7	3	4
FF	As	2012	1	22	7	3	4
FF	As	2012	1	23	9	3	6
FF	As	2012	1	24	9	3	6
FF	As	2012	1	25	9	3	6
FF	As	2012	1	26	7	4	3
FF	As	2012	1	27	3	0	3
FF	As	2012	1	28	7	3	4
FF	As	2012	1	29	8	1	7
FF	As	2012	1	30	8	3	4
FF	As	2012	2	NA	NA	NA	NA
FF	As	2012	3	NA	NA	NA	NA
FF	As	2012	4	1	9	6	2
FF	As	2012	4	2	10	7	3
FF	As	2012	4	3	7	6	1
FF	As	2012	4	4	7	4	3
FF	As	2012	4	5	5	3	2
FF	As	2012	4	6	8	4	4
FF	As	2012	4	7	6	5	1
FF	As	2012	4	8	6	4	2
FF	As	2012	4	9	7	4	3
FF	As	2012	4	10	7	6	1
FF	As	2012	4	11	4	1	3
FF	As	2012	4	12	4	2	2
FF	As	2012	4	13	6	4	2
FF	As	2012	4	14	3	2	1
FF	As	2012	4	15	7	2	5
FF	As	2012	4	16	7	5	2
FF	As	2012	4	17	9	7	2
FF	As	2012	4	18	5	2	3
FF	As	2012	4	19	7	0	7
FF	As	2012	4	20	7	3	4
FF	As	2012	4	21	7	5	2
FF	As	2012	4	22	7	4	3
FF	As	2012	4	23	9	7	2
FF	As	2012	4	24	8	3	5
FF	As	2012	4	25	7	4	3
FF	As	2012	4	26	5	4	1
FF	As	2012	4	27	6	4	1
FF	As	2012	4	28	4	3	1
FF	As	2012	4	29	6	2	4
FF	As	2012	4	30	9	5	4
FF	As	2012	5	NA	NA	NA	NA
FF	As	2012	6	NA	NA	NA	NA
FF	As	2012	7	1	7	3	4
FF	As	2012	7	2	8	5	2
FF	As	2012	7	3	3	2	1
FF	As	2012	8	1	8	0	8
FF	As	2012	8	2	7	1	6
FF	As	2012	8	3	8	6	2
FF	As	2012	8	4	8	1	7
FF	As	2012	8	5	7	1	6
FF	As	2012	8	6	7	2	4
FF	As	2012	8	7	10	6	3
FF	As	2012	8	8	10	3	7
FF	As	2012	8	9	3	0	2
FF	As	2012	8	10	9	1	7
FF	As	2012	8	11	8	1	7
FF	As	2012	8	12	9	3	4
FF	As	2012	8	13	9	2	5
FF	As	2012	8	14	9	0	5
FF	As	2012	8	15	10	0	8
FF	As	2012	8	16	6	1	5
FF	As	2012	8	17	7	1	6
FF	As	2012	8	18	5	0	5
FF	As	2012	8	19	10	0	9
FF	As	2012	8	20	6	1	5
FF	As	2012	8	21	9	2	7
FF	As	2012	8	22	9	3	6
FF	As	2012	8	23	5	2	3
FF	As	2012	8	24	8	2	6
FF	As	2012	8	25	6	1	5
FF	As	2012	8	26	9	0	9
FF	As	2012	8	27	6	1	5
FF	As	2012	8	28	9	2	7
FF	As	2012	8	29	8	0	6
FF	As	2012	8	30	7	1	5
FF	As	2012	8	31	8	4	4
FF	As	2012	8	32	7	3	4
FF	As	2012	8	33	7	1	6
FF	As	2012	8	34	5	2	3
FF	As	2012	8	35	2	2	0
FF	As	2012	8	36	4	2	2
FF	As	2012	8	37	6	5	1
FF	As	2012	8	38	7	5	2
FF	As	2012	8	39	6	3	3
FF	As	2012	8	40	6	5	1
FF	As	2012	8	41	8	5	3
FF	As	2012	8	42	7	3	3
FF	As	2012	8	43	8	2	6
FF	As	2012	8	44	8	1	6
FF	As	2012	8	45	10	7	3
FF	As	2012	8	46	6	0	5
FF	As	2012	8	47	7	3	4
FF	As	2012	8	48	6	1	4
FF	As	2012	8	49	3	0	3
FF	As	2012	8	50	10	4	6
FF	As	2012	8	51	9	5	4
FF	As	2012	8	52	9	4	5
FF	As	2012	8	53	10	8	2
FF	As	2012	8	54	9	7	2
FF	As	2012	8	55	8	4	2
FF	As	2012	8	56	8	6	2
FF	As	2012	8	57	4	1	3
FF	As	2012	8	58	7	3	4
FF	As	2012	8	59	9	8	1
FF	As	2012	8	60	9	7	2
FF	As	2012	8	61	7	1	6
FF	As	2012	8	62	9	3	6
FF	As	2012	8	63	10	4	5
FF	As	2012	8	64	7	0	7
FF	As	2012	8	65	9	0	8
FF	As	2012	8	66	8	2	5
FF	As	2012	8	67	8	5	3
FF	As	2012	8	68	7	2	4
FF	As	2012	8	69	9	2	6
FF	As	2012	8	70	9	2	4
FF	As	2012	8	71	8	0	7
FF	As	2012	8	72	8	3	5
FF	As	2012	8	73	10	5	4
FF	As	2012	8	74	8	3	3
FF	As	2012	8	75	8	5	2
FF	As	2012	8	76	6	2	3
FF	As	2012	8	77	8	7	0
FF	As	2012	8	78	7	2	3
FF	As	2012	8	79	8	2	5
FF	As	2012	8	80	11	7	4
FF	As	2012	8	81	9	3	5
FF	As	2012	8	82	10	5	5
FF	As	2012	8	83	8	3	5
FF	As	2012	8	84	8	6	2
FF	As	2012	8	85	10	4	5
FF	As	2012	8	86	9	0	9
FF	As	2012	8	87	7	6	1
FF	As	2012	8	88	9	5	4
FF	As	2012	8	89	10	1	8
FF	As	2012	8	90	6	1	5
FF	As	2012	9	1	7	6	1
FF	As	2012	9	2	6	4	2
FF	As	2012	9	3	5	4	1
FF	As	2012	10	1	8	6	2
FF	As	2012	10	2	6	4	2
FF	As	2012	10	3	5	2	3
FF	As	2012	10	4	5	3	2
FF	As	2012	10	5	6	3	3
FF	As	2012	10	6	6	6	0
FF	As	2012	11	1	5	5	0
FF	As	2012	11	2	8	6	2
FF	As	2012	12	1	5	5	0
FF	As	2012	12	2	7	7	0
FF	As	2012	12	3	5	5	0
FF	As	2012	12	4	5	5	0
FF	As	2012	12	5	5	5	0
FF	As	2012	12	6	5	5	0
FF	As	2012	12	7	5	5	0
FF	As	2012	12	8	6	6	0
FF	As	2012	12	9	4	4	0
FF	As	2012	12	10	4	4	0
FF	As	2012	13	NA	NA	NA	NA
FF	As	2012	14	NA	NA	NA	NA
FF	As	2012	15	NA	NA	NA	NA
VV	Ap	2012	1	1	10	1	5
VV	Ap	2012	1	2	7	4	1
VV	Ap	2012	1	3	11	3	1
VV	Ap	2012	1	4	9	5	1
VV	Ap	2012	1	5	10	1	2
VV	Ap	2012	1	6	11	0	0
VV	Ap	2012	1	7	12	0	3
VV	Ap	2012	1	8	11	4	1
VV	Ap	2012	1	9	11	4	1
VV	Ap	2012	1	10	10	5	0
VV	Ap	2012	1	11	11	4	2
VV	Ap	2012	1	12	7	1	3
[truncated: 9,851 more rows]

## Sheet:  Bulked Survivng
Site	Species	Year	Total	Intact	Predated
VV	Ap	2012	221	208	13
RD	Ap	2012	221	203	18
IV	Ap	2012	220	188	32
LH	As	2012	200	192	0
LM	As	2012	220	215	5
MR	As	2012	209	209	0
FG	Am	2012	220	163	57
DLL	Am	2012	230	209	21
RD	Am	2012	220	186	34
FB	Al	2013	725	676	49
MP	Al	2013	700	637	63
RR	Al	2013	693	680	13
AV	Al	2013	517	471	46
WR	Al	2013	444	385	59
VV	Ap	2013	736	670	66
DL	Ap	2013	750	711	39
RD	Ap	2013	741	686	55
IV	Ap	2013	630	542	88
SD	Ap	2013	750	730	20
LH	As	2013	750	744	6
LM	As	2013	750	745	5
PN	As	2013	627	609	18
MR	As	2013	711	710	1
FF	As	2013	45	41	4
DK	Am	2013	744	676	68
FG	Am	2013	423	340	83
RD	Am	2013	700	638	62

## Sheet: BS Predated Viability
Species	Year	Total	Viable	NonViable
As	2013	34	30	4
Ap	2013	171	93	78
Al	2013	174	101	73
Am	2013	147	107	40

## Sheet: Bulked Aborted
Site	Species	Year	Total	Aborted	Predated
FB	Al	2013	129	110	19
MP	Al	2013	114	103	11
RR	Al	2013	116	110	6
AV	Al	2013	75	58	17
WR	Al	2013	85	70	15
VV	Ap	2013	69	66	3
DL	Ap	2013	81	75	6
RD	Ap	2013	98	96	2
IV	Ap	2013	64	56	8
SD	Ap	2013	56	53	3
BV	As	2013	54	48	5
LM	As	2013	55	55	0
PN	As	2013	111	108	4
MR	As	2013	84	81	3
FF	As	2013	NA	NA	NA
FG	Am	2013	62	59	3
DK	Am	2013	61	61	0
RD	Am	2013	59	54	2

## Sheet: PodE of Seed Fate Trees
Site	Species	Year	Tree	PodE
LH	As	2012	1	800
LH	As	2012	2	700
LH	As	2012	3	800
LH	As	2012	4	200
LH	As	2012	5	2000
LH	As	2012	6	600
LH	As	2012	7	1600
LH	As	2012	8	700
LH	As	2012	9	500
LH	As	2012	10	1500
LH	As	2012	11	2500
LH	As	2012	12	200
LH	As	2012	13	100
LH	As	2012	14	1500
LH	As	2012	15	2500
LM	As	2012	1	110
LM	As	2012	2	60
LM	As	2012	3	60
LM	As	2012	4	30
LM	As	2012	5	1
LM	As	2012	6	29
LM	As	2012	7	350
LM	As	2012	8	30
LM	As	2012	9	26
LM	As	2012	10	35
LM	As	2012	11	300
LM	As	2012	12	55
LM	As	2012	13	350
LM	As	2012	14	300
LM	As	2012	15	2500
PN	As	2012	1	35
PN	As	2012	2	50
PN	As	2012	3	30
PN	As	2012	4	15
PN	As	2012	5	19
PN	As	2012	6	6
PN	As	2012	7	30
PN	As	2012	8	30
PN	As	2012	9	50
PN	As	2012	10	30
PN	As	2012	11	40
PN	As	2012	12	15
PN	As	2012	13	14
PN	As	2012	14	200
PN	As	2012	15	400
MR	As	2012	1	35
MR	As	2012	2	11
MR	As	2012	3	80
MR	As	2012	4	80
MR	As	2012	5	6
MR	As	2012	6	50
MR	As	2012	7	5
MR	As	2012	8	200
MR	As	2012	9	300
MR	As	2012	10	200
MR	As	2012	11	40
MR	As	2012	12	19
MR	As	2012	13	16
MR	As	2012	14	400
MR	As	2012	15	50
FF	As	2012	1	40
FF	As	2012	2	5
FF	As	2012	3	0
FF	As	2012	4	30
FF	As	2012	5	2
FF	As	2012	6	12
FF	As	2012	7	40
FF	As	2012	8	2500
FF	As	2012	9	25
FF	As	2012	10	30
FF	As	2012	11	23
FF	As	2012	12	11
FF	As	2012	13	40
FF	As	2012	14	0
FF	As	2012	15	1
VV	Ap	2012	1	230
VV	Ap	2012	2	10
VV	Ap	2012	3	0
VV	Ap	2012	4	250
VV	Ap	2012	5	20
VV	Ap	2012	6	600
VV	Ap	2012	7	15
VV	Ap	2012	8	15
VV	Ap	2012	9	100
VV	Ap	2012	10	100
VV	Ap	2012	11	40
VV	Ap	2012	12	30
VV	Ap	2012	13	1000
VV	Ap	2012	14	200
VV	Ap	2012	15	80
DL	Ap	2012	1	550
DL	Ap	2012	2	110
DL	Ap	2012	3	175
DL	Ap	2012	4	15
DL	Ap	2012	5	8
DL	Ap	2012	6	35
DL	Ap	2012	7	110
DL	Ap	2012	8	34
DL	Ap	2012	9	9
DL	Ap	2012	10	120
DL	Ap	2012	11	7
DL	Ap	2012	12	75
DL	Ap	2012	13	0
DL	Ap	2012	14	95
DL	Ap	2012	15	200
RD	Ap	2012	1	20
RD	Ap	2012	2	150
RD	Ap	2012	3	28
RD	Ap	2012	4	75
RD	Ap	2012	5	450
RD	Ap	2012	6	0
RD	Ap	2012	7	0
RD	Ap	2012	8	45
RD	Ap	2012	9	20
RD	Ap	2012	10	110
RD	Ap	2012	11	9
RD	Ap	2012	12	25
RD	Ap	2012	13	0
RD	Ap	2012	14	22
RD	Ap	2012	15	140
IV	Ap	2012	1	75
IV	Ap	2012	2	5
IV	Ap	2012	3	90
IV	Ap	2012	4	50
IV	Ap	2012	5	60
IV	Ap	2012	6	100
IV	Ap	2012	7	0
IV	Ap	2012	8	9
IV	Ap	2012	9	0
IV	Ap	2012	10	45
IV	Ap	2012	11	80
IV	Ap	2012	12	60
IV	Ap	2012	13	80
IV	Ap	2012	14	60
IV	Ap	2012	15	10
SD	Ap	2012	1	170
SD	Ap	2012	2	240
SD	Ap	2012	3	140
SD	Ap	2012	4	8
SD	Ap	2012	5	210
SD	Ap	2012	6	700
SD	Ap	2012	7	15
SD	Ap	2012	8	850
SD	Ap	2012	9	15
SD	Ap	2012	10	30
SD	Ap	2012	11	2500
SD	Ap	2012	12	80
SD	Ap	2012	13	120
SD	Ap	2012	14	5
SD	Ap	2012	15	40
FB	Al	2013	1	2500
FB	Al	2013	2	1500
FB	Al	2013	3	400
FB	Al	2013	4	500
FB	Al	2013	5	2500
FB	Al	2013	6	1500
FB	Al	2013	7	2500
FB	Al	2013	8	800
FB	Al	2013	9	800
FB	Al	2013	10	800
FB	Al	2013	11	2500
FB	Al	2013	12	400
FB	Al	2013	13	2500
FB	Al	2013	14	1000
FB	Al	2013	15	200
MP	Al	2013	1	2500
MP	Al	2013	2	400
MP	Al	2013	3	250
MP	Al	2013	4	150
MP	Al	2013	5	250
MP	Al	2013	6	250
MP	Al	2013	7	1000
MP	Al	2013	8	800
MP	Al	2013	9	30
MP	Al	2013	10	150
MP	Al	2013	11	200
MP	Al	2013	12	600
MP	Al	2013	13	500
MP	Al	2013	14	700
MP	Al	2013	15	200
AV	Al	2013	1	56
AV	Al	2013	2	16
AV	Al	2013	3	2
AV	Al	2013	4	33
AV	Al	2013	5	40
AV	Al	2013	6	26
AV	Al	2013	7	0
AV	Al	2013	8	0
AV	Al	2013	9	4
AV	Al	2013	10	5
AV	Al	2013	11	120
AV	Al	2013	12	0
AV	Al	2013	13	50
AV	Al	2013	14	30
AV	Al	2013	15	75
AV	Al	2013	16	0
AV	Al	2013	17	16
AV	Al	2013	18	8
AV	Al	2013	19	27
AV	Al	2013	20	30
AV	Al	2013	21	8
AV	Al	2013	22	9
AV	Al	2013	23	12
AV	Al	2013	24	29
AV	Al	2013	25	17
AV	Al	2013	26	35
AV	Al	2013	27	12
AV	Al	2013	28	33
AV	Al	2013	29	14
AV	Al	2013	30	50
WR	Al	2013	1	18
WR	Al	2013	2	500
WR	Al	2013	3	2500
WR	Al	2013	4	25
WR	Al	2013	5	80
WR	Al	2013	6	100
WR	Al	2013	7	40
WR	Al	2013	8	100
WR	Al	2013	9	200
WR	Al	2013	10	2500
WR	Al	2013	11	2500
WR	Al	2013	12	2500
WR	Al	2013	13	15
WR	Al	2013	14	2500
WR	Al	2013	15	2000
RR	Al	2013	1	200
RR	Al	2013	2	40
RR	Al	2013	3	50
RR	Al	2013	4	400
RR	Al	2013	5	500
RR	Al	2013	6	500
RR	Al	2013	7	400
RR	Al	2013	8	35
RR	Al	2013	9	50
RR	Al	2013	10	80
RR	Al	2013	11	30
RR	Al	2013	12	150
RR	Al	2013	13	25
RR	Al	2013	14	50
RR	Al	2013	15	40
VV	Ap	2013	1	200
VV	Ap	2013	2	40
VV	Ap	2013	3	0
VV	Ap	2013	4	30
VV	Ap	2013	5	12
VV	Ap	2013	6	40
VV	Ap	2013	7	8
VV	Ap	2013	8	0
VV	Ap	2013	9	25
VV	Ap	2013	10	40
VV	Ap	2013	11	30
VV	Ap	2013	12	0
VV	Ap	2013	13	22
VV	Ap	2013	14	120
VV	Ap	2013	15	250
VV	Ap	2013	16	30
VV	Ap	2013	17	800
VV	Ap	2013	18	50
DL	Ap	2013	1	800
DL	Ap	2013	2	800
DL	Ap	2013	3	1000
DL	Ap	2013	4	100
DL	Ap	2013	5	50
DL	Ap	2013	6	800
DL	Ap	2013	7	800
DL	Ap	2013	8	1500
DL	Ap	2013	9	200
DL	Ap	2013	10	150
DL	Ap	2013	11	400
DL	Ap	2013	12	50
DL	Ap	2013	13	30
DL	Ap	2013	14	150
DL	Ap	2013	15	30
RD	Ap	2013	1	100
RD	Ap	2013	2	16
RD	Ap	2013	3	0
RD	Ap	2013	4	13
RD	Ap	2013	5	40
RD	Ap	2013	6	0
RD	Ap	2013	7	0
RD	Ap	2013	8	30
RD	Ap	2013	9	29
RD	Ap	2013	10	40
RD	Ap	2013	11	25
RD	Ap	2013	12	70
RD	Ap	2013	13	40
RD	Ap	2013	14	38
RD	Ap	2013	15	40
RD	Ap	2013	16	400
RD	Ap	2013	17	200
RD	Ap	2013	18	50
IV	Ap	2013	1	30
IV	Ap	2013	2	40
IV	Ap	2013	3	40
IV	Ap	2013	4	350
IV	Ap	2013	5	18
IV	Ap	2013	6	0
IV	Ap	2013	7	40
IV	Ap	2013	8	150
IV	Ap	2013	9	0
IV	Ap	2013	10	15
IV	Ap	2013	11	50
IV	Ap	2013	12	30
IV	Ap	2013	13	0
IV	Ap	2013	14	200
IV	Ap	2013	15	7
IV	Ap	2013	16	80
IV	Ap	2013	17	50
SD	Ap	2013	1	2500
SD	Ap	2013	2	2500
SD	Ap	2013	3	2500
SD	Ap	2013	4	2500
SD	Ap	2013	5	2500
SD	Ap	2013	6	1000
SD	Ap	2013	7	300
SD	Ap	2013	8	2500
SD	Ap	2013	9	2500
SD	Ap	2013	10	2500
SD	Ap	2013	11	100
SD	Ap	2013	12	300
SD	Ap	2013	13	80
SD	Ap	2013	14	200
SD	Ap	2013	15	30
LH	As	2013	1	50
LH	As	2013	2	400
LH	As	2013	3	150
LH	As	2013	4	500
LH	As	2013	5	250
LH	As	2013	6	200
LH	As	2013	7	800
LH	As	2013	8	200
LH	As	2013	9	2500
LH	As	2013	10	1000
LH	As	2013	11	250
LH	As	2013	12	2500
LH	As	2013	13	450
LH	As	2013	14	200
LH	As	2013	15	2500
LM	As	2013	1	50
LM	As	2013	2	50
LM	As	2013	3	30
LM	As	2013	4	400
LM	As	2013	5	60
LM	As	2013	6	60
LM	As	2013	7	250
LM	As	2013	8	40
LM	As	2013	9	700
LM	As	2013	10	80
LM	As	2013	11	40
LM	As	2013	12	300
LM	As	2013	13	80
LM	As	2013	14	300
LM	As	2013	15	80
PN	As	2013	1	40
PN	As	2013	2	18
PN	As	2013	3	150
PN	As	2013	4	26
PN	As	2013	5	9
PN	As	2013	6	16
PN	As	2013	7	9
PN	As	2013	8	50
PN	As	2013	9	40
PN	As	2013	10	13
PN	As	2013	11	75
PN	As	2013	12	26
PN	As	2013	13	50
PN	As	2013	14	100
PN	As	2013	15	30
MR	As	2013	1	80
MR	As	2013	2	150
MR	As	2013	3	200
MR	As	2013	4	40
MR	As	2013	5	150
MR	As	2013	6	200
MR	As	2013	7	400
MR	As	2013	8	40
MR	As	2013	9	33
MR	As	2013	10	30
MR	As	2013	11	80
MR	As	2013	12	50
MR	As	2013	13	32
MR	As	2013	14	700
MR	As	2013	15	80
FF	As	2013	1	2500
FF	As	2013	2	2500
FF	As	2013	3	300
FF	As	2013	4	1000
FF	As	2013	5	50
FF	As	2013	6	80
FF	As	2013	7	21
FF	As	2013	8	70
FF	As	2013	9	40
FF	As	2013	10	50
FF	As	2013	11	250
FF	As	2013	12	200
FF	As	2013	13	40
FF	As	2013	14	40
FF	As	2013	15	2500

## Sheet:  Seed Rain Trees (SRT)
Site	Species	Year	Sample	Diameter	Canopy1	Canopy2
AV	Al	2013	1	146	4	3.83
AV	Al	2013	2	46	4.1	2.6
AV	Al	2013	3	47	3.18	2.9
AV	Al	2013	4	59	3.25	2.4
AV	Al	2013	5	56	4.1	3.47
AV	Al	2013	6	48	3.8	3.8
AV	Al	2013	7	92	5.4	2.66
AV	Al	2013	8	13	1.8	1.3
AV	Al	2013	9	252	9.1	6.2
AV	Al	2013	10	77	3.25	2.45
AV	Al	2013	11	99	5.2	4.8
AV	Al	2013	12	63	3.82	2.23
AV	Al	2013	13	127	5.14	3.3
AV	Al	2013	14	101	2.75	2.15
AV	Al	2013	15	43	2.74	2.5
AV	Al	2013	16	66	2.56	2.35
AV	Al	2013	17	87	2.56	2
AV	Al	2013	18	37	1.7	1.3
AV	Al	2013	19	29	1.53	1.5
AV	Al	2013	20	18	1.7	1.4
AV	Al	2013	21	37	2.4	1.35
AV	Al	2013	22	46	3.42	2.75
AV	Al	2013	23	45	3.2	2.85
AV	Al	2013	24	23	3.02	2.5
AV	Al	2013	25	15	1.5	1.3
DL	Ap	2012	1	59	1.11	0.97
DL	Ap	2012	2	84	4.74	3.5
DL	Ap	2012	3	61	1.5	1.3
DL	Ap	2012	4	35	0.99	0.95
DL	Ap	2012	5	70	2.7	2.63
DL	Ap	2012	6	71	3.42	1.9
DL	Ap	2012	7	23	0.86	0.7
DL	Ap	2012	8	38	0.98	0.77
DL	Ap	2012	9	31	1	0.67
DL	Ap	2012	10	25	0.54	0.5
DL	Ap	2012	11	20	0.72	0.7
DL	Ap	2012	12	55	1.9	1.4
DL	Ap	2012	13	32	1.27	1.03
DL	Ap	2012	14	25	0.88	0.7
DL	Ap	2012	15	24	1.18	0.72
DL	Ap	2012	16	9	0.4	0.3
DL	Ap	2012	17	30	1.22	1
DL	Ap	2012	18	30	1.07	0.77
DL	Ap	2012	19	74	3.7	3.6
DL	Ap	2012	20	13	0.4	0.4
DL	Ap	2012	21	21	1.41	1.36
DL	Ap	2012	22	77	2.6	1.6
DL	Ap	2012	23	63	2.4	2.2
DL	Ap	2012	24	18	0.95	0.46
DL	Ap	2012	25	65	2.3	1.6
DL	Ap	2013	1	19	1.33	0.39
DL	Ap	2013	2	26	1.1	0.68
DL	Ap	2013	3	53	1.7	1.03
DL	Ap	2013	4	64	1.8	1.2
DL	Ap	2013	5	19	0.78	0.57
DL	Ap	2013	6	29	1.6	0.96
DL	Ap	2013	7	43	1	0.6
DL	Ap	2013	8	32	0.76	0.46
DL	Ap	2013	9	89	2.53	1.9
DL	Ap	2013	10	16	0.9	0.65
DL	Ap	2013	11	39	1.4	1.1
DL	Ap	2013	12	27	0.66	0.44
DL	Ap	2013	13	69	1.62	1.28
DL	Ap	2013	14	24	0.6	0.6
DL	Ap	2013	15	22	1.7	0.52
DL	Ap	2013	16	29	1.7	1.6
DL	Ap	2013	17	22	0.7	0.5
DL	Ap	2013	18	58	1.5	0.75
DL	Ap	2013	19	35	1.1	0.55
DL	Ap	2013	20	45	1.2	0.97
DL	Ap	2013	21	11	0.9	0.6
DL	Ap	2013	22	83	3.4	3.1
DL	Ap	2013	23	24	0.8	0.55
DL	Ap	2013	24	33	0.98	0.7
DL	Ap	2013	25	24	1.5	0.9
FB	Al	2013	1	28	2.3	2.1
FB	Al	2013	2	54	2.66	1.75
FB	Al	2013	3	57	3.2	2.35
FB	Al	2013	4	35	3.5	2.3
FB	Al	2013	5	101	3	1.62
FB	Al	2013	6	97	3.5	1.57
FB	Al	2013	7	93	3.25	1.97
FB	Al	2013	8	114	2.95	1.99
FB	Al	2013	9	148	3.86	3
FB	Al	2013	10	41	1.8	1.76
FB	Al	2013	11	21	2.1	1.6
FB	Al	2013	12	115	2.8	1
FB	Al	2013	13	18	2.8	1.52
FB	Al	2013	14	128	1.84	1.5
FB	Al	2013	15	182	3.7	3.5
FB	Al	2013	16	70	2.2	1.52
FB	Al	2013	17	115	2.6	1.54
FB	Al	2013	18	118	3.39	2.68
FB	Al	2013	19	113	2.98	2.35
FB	Al	2013	20	142	3.45	2.6
FB	Al	2013	21	115	1.7	1.64
FB	Al	2013	22	27	1.34	1.24
FB	Al	2013	23	136	2.6	2.15
FB	Al	2013	24	90	1.94	1.83
FB	Al	2013	25	73	2.45	1.5
FF	As	2012	1	35	2.4	1.97
FF	As	2012	2	32	1.68	1.66
FF	As	2012	3	15	1.8	1.7
FF	As	2012	4	77	3.2	2.9
FF	As	2012	5	24	3.35	2.2
FF	As	2012	6	16	1.4	1
FF	As	2012	7	22	1.7	1.5
FF	As	2012	8	10	0.9	0.55
FF	As	2012	9	92	2.9	2.75
FF	As	2012	10	33	1.8	1.25
FF	As	2012	11	96	4	3.9
FF	As	2012	12	64	4	3.2
FF	As	2012	13	64	4.8	4.6
FF	As	2012	14	40	1.7	1.25
FF	As	2012	15	70	4.2	3
FF	As	2012	16	21	1.85	1.55
FF	As	2012	17	42	2.6	1.3
FF	As	2012	18	28	1.7	0.9
FF	As	2012	19	53	3.3	2.6
FF	As	2012	20	48	2.1	2.1
FF	As	2012	21	16	0.8	0.7
FF	As	2012	22	50	2.9	2.5
FF	As	2012	23	51	2.1	1.75
FF	As	2012	24	30	1.5	1.5
FF	As	2012	25	29	1.7	1.15
IV	Ap	2012	1	58	1.28	1.2
IV	Ap	2012	2	56	2.2	1.6
IV	Ap	2012	3	68	2.24	2.2
IV	Ap	2012	4	44	2.6	1.7
IV	Ap	2012	5	50	3.9	2.4
IV	Ap	2012	6	50	1.9	1.41
IV	Ap	2012	7	39	1.3	0.9
IV	Ap	2012	8	18	0.2	0.2
IV	Ap	2012	9	33	0.52	0.3
IV	Ap	2012	10	38	1.4	1.2
IV	Ap	2012	11	51	4.39	2.92
IV	Ap	2012	12	18	0.56	0.34
IV	Ap	2012	13	43	1.6	0.6
IV	Ap	2012	14	53	2.48	1.09
IV	Ap	2012	15	88	1.95	1.76
IV	Ap	2012	16	13	0.9	0.2
IV	Ap	2012	17	47	2	0.9
IV	Ap	2012	18	66	2.2	1.39
IV	Ap	2012	19	56	1.7	0.7
IV	Ap	2012	20	14	0.5	0.48
IV	Ap	2012	21	68	2.6	1.25
IV	Ap	2012	22	46	2.95	2.1
IV	Ap	2012	23	92	3.7	3.65
IV	Ap	2012	24	61	0.9	0.4
IV	Ap	2012	25	19	3.24	2.7
IV	Ap	2013	1	16	0.76	0.5
IV	Ap	2013	2	54	1.7	1.5
IV	Ap	2013	3	19	1.28	0.46
IV	Ap	2013	4	23	1.06	1
IV	Ap	2013	5	40	0.9	0.8
IV	Ap	2013	6	50	0.8	0.76
IV	Ap	2013	7	52	1.3	0.88
IV	Ap	2013	8	52	1.15	0.9
IV	Ap	2013	9	14	0.6	0.53
IV	Ap	2013	10	56	1.1	0.96
IV	Ap	2013	11	131	2.15	1.95
IV	Ap	2013	12	35	1.25	0.97
IV	Ap	2013	13	19	0.64	0.45
IV	Ap	2013	14	41	0.7	0.69
IV	Ap	2013	15	6	0.32	0.32
IV	Ap	2013	16	41	0.75	0.55
IV	Ap	2013	17	58	1.85	1.75
IV	Ap	2013	18	45	1.16	0.8
IV	Ap	2013	19	111	2.55	1.66
IV	Ap	2013	20	74	2.58	1.57
IV	Ap	2013	21	33	0.9	0.45
IV	Ap	2013	22	9	0.44	0.4
IV	Ap	2013	23	62	1.7	0.76
IV	Ap	2013	24	69	1.8	1.1
IV	Ap	2013	25	48	1.45	0.98
LH	As	2012	1	37	2.05	1.33
LH	As	2012	2	82	4	2.8
LH	As	2012	3	55	2.69	1.9
LH	As	2012	4	84	3.1	2.7
LH	As	2012	5	85	2.46	2.4
LH	As	2012	6	67	2.9	2.4
LH	As	2012	7	81	2.5	2.1
LH	As	2012	8	85	2.9	2.8
LH	As	2012	9	69	1.6	1.6
LH	As	2012	10	82	4.2	3
LH	As	2012	11	80	3.4	2.7
LH	As	2012	12	69	2.8	2.8
LH	As	2012	13	51	2.1	1.7
LH	As	2012	14	30	2	1.6
LH	As	2012	15	111	4.1	3.3
LH	As	2012	16	46	2	1.9
LH	As	2012	17	46	2.15	2
LH	As	2012	18	43	2.9	2.6
LH	As	2012	19	43	2.5	2.1
LH	As	2012	20	61	2.5	2.2
LH	As	2012	21	79	2.7	2.4
LH	As	2012	22	48	3	2.8
LH	As	2012	23	56	2.3	2.2
LH	As	2012	24	70	3.6	2.8
LH	As	2012	25	81	2.6	2.4
LH	As	2013	1	74	2.65	2.1
LH	As	2013	2	58	3.2	2.85
LH	As	2013	3	91	2.58	2.5
LH	As	2013	4	52	2.3	2
LH	As	2013	5	41	1.5	1.42
LH	As	2013	6	97	3.9	3.4
LH	As	2013	7	62	2.9	2.07
LH	As	2013	8	89	2.68	2.35
LH	As	2013	9	46	1.65	1.46
LH	As	2013	10	82	1.96	1.36
LH	As	2013	11	39	3.3	1.99
LH	As	2013	12	93	2.4	2.33
LH	As	2013	13	126	4.1	3.4
LH	As	2013	14	147	5.38	3.25
LH	As	2013	15	57	1.8	1.49
LH	As	2013	16	44	2.5	1.84
LH	As	2013	17	64	2.3	1.77
LH	As	2013	18	88	2.96	2.7
LH	As	2013	19	59	2.6	2.05
LH	As	2013	20	86	2.8	2.1
LH	As	2013	21	48	1.58	1.19
LH	As	2013	22	93	2.4	2.25
LH	As	2013	23	65	1.8	1.28
LH	As	2013	24	45	2.28	1.9
LH	As	2013	25	39	2.1	1.2
LM	As	2012	1	33	1.7	1.5
LM	As	2012	2	47	2.7	2.3
LM	As	2012	3	76	2	2
LM	As	2012	4	14	1	0.74
LM	As	2012	5	42	2.4	2.1
LM	As	2012	6	28	1.6	1.3
LM	As	2012	7	38	1.8	1.44
LM	As	2012	8	52	1.8	1.6
LM	As	2012	9	18	1.5	1.4
LM	As	2012	10	39	2.2	2
LM	As	2012	11	50	1.5	1.4
LM	As	2012	12	28	1.8	1.7
LM	As	2012	13	25	1.3	0.8
LM	As	2012	14	37	1.9	1.4
LM	As	2012	15	63	2.2	1.8
LM	As	2012	16	46	2	1.8
LM	As	2012	17	45	1.4	1.3
LM	As	2012	18	37	1.9	0.8
LM	As	2012	19	21	1.4	1.1
LM	As	2012	20	17	1.7	1.1
LM	As	2012	21	49	1.5	1.4
LM	As	2012	22	31	1.4	1.2
LM	As	2012	23	12	1.9	1.3
LM	As	2012	24	19	1.2	1.1
LM	As	2012	25	57	1.6	1.6
LM	As	2013	1	44	1.42	1.4
LM	As	2013	2	15	1.12	0.7
LM	As	2013	3	35	2.3	1.6
LM	As	2013	4	64	1	1
LM	As	2013	5	41	1.7	0.95
LM	As	2013	6	17	0.9	0.8
LM	As	2013	7	41	1	1
LM	As	2013	8	48	1.56	1
LM	As	2013	9	151	2.7	2.7
LM	As	2013	10	66	1.3	1.2
LM	As	2013	11	20	1.82	1.15
LM	As	2013	12	67	1.8	1.5
LM	As	2013	13	39	1.3	1
LM	As	2013	14	38	1.02	0.6
LM	As	2013	15	39	2.15	1.46
LM	As	2013	16	62	1.56	1.1
LM	As	2013	17	50	2.5	1.86
LM	As	2013	18	24	1.08	0.8
LM	As	2013	19	16	1.45	1.1
LM	As	2013	20	84	1.95	1.5
LM	As	2013	21	38	2.6	1.7
LM	As	2013	22	32	1.33	1.23
LM	As	2013	23	66	1.28	1.06
LM	As	2013	24	80	2.1	1.7
LM	As	2013	25	25	1.1	1.1
MP	Al	2013	1	57	0.95	0.45
MP	Al	2013	2	65	1.3	1.29
MP	Al	2013	3	76	0.6	0.3
MP	Al	2013	4	220	3	2.57
MP	Al	2013	5	170	1.9	1.38
MP	Al	2013	6	164	3.5	2.92
MP	Al	2013	7	137	2.15	1.83
MP	Al	2013	8	62	2.68	1.2
MP	Al	2013	9	33	2.08	1.7
MP	Al	2013	10	41	1.17	0.82
MP	Al	2013	11	83	1.45	1.36
MP	Al	2013	12	141	1.75	1.6
MP	Al	2013	13	135	1.67	1.44
MP	Al	2013	14	143	2.4	1.64
MP	Al	2013	15	153	1.13	1
MP	Al	2013	16	133	2.09	1.29
MP	Al	2013	17	80	1.75	1.2
MP	Al	2013	18	198	4.59	4.14
MP	Al	2013	19	105	1.88	1.69
MP	Al	2013	20	179	4.9	3.8
MP	Al	2013	21	212	2.75	2.03
MP	Al	2013	22	149	5.45	3.68
MP	Al	2013	23	100	3.17	2.3
MP	Al	2013	24	174	3.9	3.76
MP	Al	2013	25	191	3.1	2.8
MR	As	2012	1	32	2.48	2.2
MR	As	2012	2	43	3.4	2.9
MR	As	2012	3	34	2	1.9
MR	As	2012	4	37	1.98	1.88
MR	As	2012	5	31	1.78	1.38
MR	As	2012	6	47	1.6	1.6
MR	As	2012	7	13	0.64	0.48
MR	As	2012	8	37	2.18	1.9
MR	As	2012	9	33	3.2	2.48
MR	As	2012	10	18	1.32	1.19
MR	As	2012	11	11	0.75	0.58
MR	As	2012	12	22	2.6	1.55
MR	As	2012	13	42	2.66	1.65
MR	As	2012	14	15	1.2	0.9
MR	As	2012	15	70	2.5	2.25
MR	As	2012	16	26	1.58	1.53
MR	As	2012	17	38	2.2	1.7
MR	As	2012	18	65	3.59	3
MR	As	2012	19	51	2.37	2.27
MR	As	2012	20	20	1.55	1.5
MR	As	2012	21	16	1.4	0.74
MR	As	2012	22	24	1.6	1.5
MR	As	2012	23	31	2.6	2.3
MR	As	2012	24	51	2.87	2.56
MR	As	2012	25	38	2.35	1.96
MR	As	2013	1	40	1.3	1.15
MR	As	2013	2	17	0.7	0.6
MR	As	2013	3	16	1.6	0.7
MR	As	2013	4	42	1.78	1.77
MR	As	2013	5	34	1.9	1.9
MR	As	2013	6	38	2.05	1.38
MR	As	2013	7	43	2.2	1.8
MR	As	2013	8	45	2.55	2.4
MR	As	2013	9	22	1.2	0.7
MR	As	2013	10	47	2.3	1.85
MR	As	2013	11	42	2.53	2.2
MR	As	2013	12	25	1.25	1.13
MR	As	2013	13	65	2.6	2.06
MR	As	2013	14	95	4.4	3
MR	As	2013	15	23	1.9	1.26
MR	As	2013	16	20	1.4	1.3
MR	As	2013	17	73	4.22	3.09
MR	As	2013	18	62	2.62	2.24
MR	As	2013	19	16	1.06	0.8
MR	As	2013	20	13	0.9	0.8
MR	As	2013	21	18	1	0.9
MR	As	2013	22	26	1.6	1.5
MR	As	2013	23	30	2.3	2
MR	As	2013	24	34	2.4	1.7
MR	As	2013	25	37	2.24	2.25
PN	As	2012	1	37	1.9	1.5
PN	As	2012	2	19	1.3	0.83
PN	As	2012	3	10	1.18	0.7
PN	As	2012	4	28	1.8	1.4
PN	As	2012	5	19	1	1
PN	As	2012	6	11	0.7	0.6
PN	As	2012	7	11	0.6	0.4
PN	As	2012	8	31	1.34	1.17
PN	As	2012	9	18	1.18	0.84
PN	As	2012	10	11	1.05	0.7
PN	As	2012	11	8	0.45	0.4
PN	As	2012	12	19	1.8	0.8
PN	As	2012	13	18	1	0.9
PN	As	2012	14	34	1.5	1.24
PN	As	2012	15	5	0.9	0.7
PN	As	2012	16	9	0.7	0.6
PN	As	2012	17	12	0.7	0.7
PN	As	2012	18	10	1.05	0.7
PN	As	2012	19	20	1.7	0.6
PN	As	2012	20	23	1.1	0.8
PN	As	2012	21	12	0.9	0.6
PN	As	2012	22	7	0.5	0.5
PN	As	2012	23	14	2.1	1.6
PN	As	2012	24	20	1.8	0.9
PN	As	2012	25	26	2.6	1.7
PN	As	2013	1	30	1.02	0.54
PN	As	2013	2	24	0.38	0.37
PN	As	2013	3	10	0.49	0.35
PN	As	2013	4	36	1.48	1.12
PN	As	2013	5	6	0.5	0.5
PN	As	2013	6	33	1.38	0.7
PN	As	2013	7	16	0.93	0.75
PN	As	2013	8	39	2.9	2.03
PN	As	2013	9	15	0.66	0.57
PN	As	2013	10	41	1.77	1.44
PN	As	2013	11	35	1.3	0.85
PN	As	2013	12	7	0.5	0.48
PN	As	2013	13	29	0.8	0.77
PN	As	2013	14	13	1.28	0.9
PN	As	2013	15	21	1.15	0.78
PN	As	2013	16	29	1.36	0.99
PN	As	2013	17	13	1.04	1
PN	As	2013	18	27	1.07	0.82
PN	As	2013	19	32	1.5	0.6
PN	As	2013	20	6	0.5	0.45
PN	As	2013	21	57	1.68	0.5
PN	As	2013	22	64	2	1.48
PN	As	2013	23	79	2.38	1.7
PN	As	2013	24	52	1.8	1.08
PN	As	2013	25	65	2.45	1.82
RD	Ap	2012	1	39	1.5	1.1
RD	Ap	2012	2	74	2.95	1.28
RD	Ap	2012	3	86	3.7	2.9
RD	Ap	2012	4	30	0.75	0.63
RD	Ap	2012	5	18	0.62	0.53
RD	Ap	2012	6	17	0.78	0.82
RD	Ap	2012	7	95	3.4	3.1
RD	Ap	2012	8	53	1.9	1.84
RD	Ap	2012	9	25	1.04	0.66
RD	Ap	2012	10	33	1.4	1.4
RD	Ap	2012	11	85	3.35	2.15
RD	Ap	2012	12	33	1.4	1.1
RD	Ap	2012	13	22	0.86	0.85
RD	Ap	2012	14	14	0.9	0.73
RD	Ap	2012	15	15	0.65	0.61
RD	Ap	2012	16	18	1.06	0.7
RD	Ap	2012	17	112	5.2	4.9
RD	Ap	2012	18	54	1.84	1.84
RD	Ap	2012	19	30	1.25	1.05
RD	Ap	2012	20	27	1.37	0.77
RD	Ap	2012	21	21	1.08	0.97
RD	Ap	2012	22	9	0.38	0.28
RD	Ap	2012	23	34	1.15	0.96
RD	Ap	2012	24	20	0.97	0.95
RD	Ap	2012	25	22	1.28	1.02
RD	Ap	2013	1	40	1	0.6
RD	Ap	2013	2	20	1.1	0.48
RD	Ap	2013	3	12	0.7	0.5
RD	Ap	2013	4	14	0.6	0.4
RD	Ap	2013	5	11	0.6	0.6
RD	Ap	2013	6	21	0.89	0.77
RD	Ap	2013	7	18	1.08	0.8
RD	Ap	2013	8	15	0.7	0.55
RD	Ap	2013	9	23	0.9	0.7
RD	Ap	2013	10	38	1.1	0.9
RD	Ap	2013	11	26	0.9	0.9
RD	Ap	2013	12	18	0.44	0.3
RD	Ap	2013	13	25	0.7	0.55
RD	Ap	2013	14	210	6.25	4.18
RD	Ap	2013	15	27	1.06	0.8
RD	Ap	2013	16	29	0.75	0.63
RD	Ap	2013	17	26	0.86	0.68
RD	Ap	2013	18	39	1.47	0.7
RD	Ap	2013	19	45	1.5	1.5
RD	Ap	2013	20	57	1.6	1.1
RD	Ap	2013	21	19	0.8	0.5
RD	Ap	2013	22	20	0.78	0.55
RD	Ap	2013	23	33	1.2	0.6
RD	Ap	2013	24	12	0.7	0.68
RD	Ap	2013	25	7	0.4	0.35
SD	Ap	2012	1	60	1.6	1.4
SD	Ap	2012	2	81	3.82	3.1
SD	Ap	2012	3	131	7.4	6.3
SD	Ap	2012	4	87	3.7	3.5
SD	Ap	2012	5	175	5.2	4.7
SD	Ap	2012	6	71	4.1	3.8
SD	Ap	2012	7	146	5.3	5.1
SD	Ap	2012	8	65	3.3	2.3
SD	Ap	2012	9	112	3.3	2.2
SD	Ap	2012	10	100	4	4
SD	Ap	2012	11	125	4.25	4.06
SD	Ap	2012	12	57	2.5	2.2
SD	Ap	2012	13	81	3.2	2.1
SD	Ap	2012	14	75	2.4	2.1
SD	Ap	2012	15	105	3.6	1.9
SD	Ap	2012	16	75	3	1.5
SD	Ap	2012	17	133	6.1	4.7
SD	Ap	2012	18	113	5	2.2
SD	Ap	2012	19	156	7.4	5.9
SD	Ap	2012	20	219	7.9	7.1
SD	Ap	2012	21	55	2.7	1.2
SD	Ap	2012	22	91	2.7	2.3
SD	Ap	2012	23	37	2.5	1.8
SD	Ap	2012	24	28	1.4	1.1
SD	Ap	2012	25	37	1.8	1
VV	Ap	2012	1	42	1.67	0.75
VV	Ap	2012	2	27	1.8	1.43
VV	Ap	2012	3	82	2.5	1.9
VV	Ap	2012	4	39	1.48	1.2
VV	Ap	2012	5	70	2.36	2.39
VV	Ap	2012	6	34	1.4	1
VV	Ap	2012	7	64	2	1.25
VV	Ap	2012	8	37	1.49	1.13
VV	Ap	2012	9	46	1.2	0.92
VV	Ap	2012	10	27	0.7	0.6
VV	Ap	2012	11	37	2	1.2
VV	Ap	2012	12	38	3.5	3.5
VV	Ap	2012	13	115	3.88	2.92
VV	Ap	2012	14	28	1.17	1.05
VV	Ap	2012	15	23	1.04	0.77
VV	Ap	2012	16	56	1.52	0.85
VV	Ap	2012	17	56	1.69	1.45
VV	Ap	2012	18	65	1.7	1.55
VV	Ap	2012	19	107	3.3	3.11
VV	Ap	2012	20	46	1.23	1.05
VV	Ap	2012	21	50	1.35	1
VV	Ap	2012	22	109	5.7	4.5
VV	Ap	2012	23	51	1.52	1.23
VV	Ap	2012	24	34	1.4	0.9
VV	Ap	2012	25	70	2.47	2.09
VV	Ap	2013	1	102	3.7	3
VV	Ap	2013	2	67	2.56	0.79
VV	Ap	2013	3	94	3.08	3.03
VV	Ap	2013	4	71	3.7	1
VV	Ap	2013	5	42	1.36	1.23
VV	Ap	2013	6	26	1	0.9
VV	Ap	2013	7	49	1	0.9
VV	Ap	2013	8	77	2.25	1.99
VV	Ap	2013	9	54	1.28	1.06
VV	Ap	2013	10	43	0.85	0.8
VV	Ap	2013	11	43	1	0.96
VV	Ap	2013	12	16	0.96	0.66
VV	Ap	2013	13	44	1.1	0.87
VV	Ap	2013	14	70	1.73	1.4
VV	Ap	2013	15	101	2.64	2.22
VV	Ap	2013	16	18	0.68	0.3
VV	Ap	2013	17	123	4.02	1.5
VV	Ap	2013	18	64	1.35	1.1
VV	Ap	2013	19	120	2.08	1.7
VV	Ap	2013	20	90	1.65	1.6
VV	Ap	2013	21	83	2.5	1.3
VV	Ap	2013	22	48	2.83	0.7
VV	Ap	2013	23	45	2.25	1.12
VV	Ap	2013	24	23	0.75	0.62
VV	Ap	2013	25	19	1.15	0.7
WR	Al	2013	1	41	2.3	2.1
WR	Al	2013	2	68	1.79	1.72
WR	Al	2013	3	310	9.2	7.5
WR	Al	2013	4	115	3.38	2.5
WR	Al	2013	5	89	2.83	1.78
WR	Al	2013	6	71	3.68	2.6
WR	Al	2013	7	40	1.77	1.76
WR	Al	2013	8	140	4.14	2.26
WR	Al	2013	9	26	1.54	0.82
WR	Al	2013	10	260	9.3	6.64
WR	Al	2013	11	212	7.45	5.63
WR	Al	2013	12	158	10.9	2.7
WR	Al	2013	13	258	6.14	3.5
WR	Al	2013	14	80	2.22	1.35
WR	Al	2013	15	77	1.7	1.5
WR	Al	2013	16	83	1.73	1.6
WR	Al	2013	17	40	1.61	0.9
WR	Al	2013	18	31	1.94	1.3
WR	Al	2013	19	48	4.79	2.26
WR	Al	2013	20	135	7.2	6.9
WR	Al	2013	21	91	2.9	1.68
WR	Al	2013	22	16	1.63	1.6
WR	Al	2013	23	54	2.8	2.5
WR	Al	2013	24	258	5.6	5.33
WR	Al	2013	25	223	7.83	7

## Sheet:  Seed Rain of SRT
Site	Species	Year	Sample	Cup	SeedC	Aborted	Predated
LH	As	2012	1	1	29	1	1
LH	As	2012	1	2	24	0	0
LH	As	2012	1	3	25	0	2
LH	As	2012	2	1	20	0	0
LH	As	2012	2	2	29	0	1
LH	As	2012	2	3	45	0	0
LH	As	2012	3	1	30	0	1
LH	As	2012	3	2	21	0	1
LH	As	2012	3	3	23	1	1
LH	As	2012	4	1	16	0	1
LH	As	2012	4	2	40	0	0
LH	As	2012	4	3	0	0	0
LH	As	2012	5	1	22	0	0
LH	As	2012	5	2	14	0	1
LH	As	2012	5	3	11	0	0
LH	As	2012	6	1	26	1	1
LH	As	2012	6	2	26	0	0
LH	As	2012	6	3	0	0	0
LH	As	2012	7	1	8	0	0
LH	As	2012	7	2	17	1	1
LH	As	2012	7	3	16	0	0
LH	As	2012	8	1	18	1	3
LH	As	2012	8	2	29	0	0
LH	As	2012	8	3	19	1	1
LH	As	2012	9	1	26	0	4
LH	As	2012	9	2	21	1	0
LH	As	2012	9	3	18	0	0
LH	As	2012	10	1	18	0	0
LH	As	2012	10	2	17	1	1
LH	As	2012	10	3	15	0	0
LH	As	2012	11	1	10	0	0
LH	As	2012	11	2	33	0	0
LH	As	2012	11	3	21	0	0
LH	As	2012	12	1	31	0	3
LH	As	2012	12	2	21	0	0
LH	As	2012	12	3	51	0	0
LH	As	2012	13	1	37	0	1
LH	As	2012	13	2	23	0	3
LH	As	2012	13	3	32	1	3
LH	As	2012	14	1	29	0	3
LH	As	2012	14	2	25	1	0
LH	As	2012	14	3	35	0	0
LH	As	2012	15	1	10	0	1
LH	As	2012	15	2	9	0	0
LH	As	2012	15	3	19	0	3
LH	As	2012	16	1	19	2	1
LH	As	2012	16	2	11	0	0
LH	As	2012	16	3	17	0	1
LH	As	2012	17	1	26	1	0
LH	As	2012	17	2	24	0	0
LH	As	2012	17	3	24	0	1
LH	As	2012	18	1	0	0	0
LH	As	2012	18	2	6	0	0
LH	As	2012	18	3	17	0	0
LH	As	2012	19	1	7	0	0
LH	As	2012	19	2	1	0	1
LH	As	2012	19	3	9	0	0
LH	As	2012	20	1	10	0	1
LH	As	2012	20	2	16	0	0
LH	As	2012	20	3	32	0	1
LH	As	2012	21	1	24	1	1
LH	As	2012	21	2	22	0	2
LH	As	2012	21	3	18	0	0
LH	As	2012	22	1	2	0	0
LH	As	2012	22	2	0	0	0
LH	As	2012	22	3	10	0	0
LH	As	2012	23	1	14	0	3
LH	As	2012	23	2	12	0	0
LH	As	2012	23	3	4	0	0
LH	As	2012	24	1	11	0	0
LH	As	2012	24	2	18	0	0
LH	As	2012	24	3	11	0	0
LH	As	2012	25	1	4	0	0
LH	As	2012	25	2	5	0	0
LH	As	2012	25	3	2	1	1
LM	As	2012	1	1	7	0	1
LM	As	2012	1	2	8	2	1
LM	As	2012	1	3	8	0	2
LM	As	2012	2	1	41	1	11
LM	As	2012	2	2	53	1	21
LM	As	2012	2	3	12	0	0
LM	As	2012	3	1	21	2	1
LM	As	2012	3	2	16	0	0
LM	As	2012	3	3	18	0	2
LM	As	2012	4	1	6	0	0
LM	As	2012	4	2	4	0	1
LM	As	2012	4	3	6	0	0
LM	As	2012	5	1	1	0	1
LM	As	2012	5	2	16	0	1
LM	As	2012	5	3	14	3	0
LM	As	2012	6	1	23	0	10
LM	As	2012	6	2	3	1	0
LM	As	2012	6	3	11	0	4
LM	As	2012	7	1	5	0	0
LM	As	2012	7	2	4	0	2
LM	As	2012	7	3	1	0	0
LM	As	2012	8	1	3	0	0
LM	As	2012	8	2	1	0	0
LM	As	2012	8	3	13	2	2
LM	As	2012	9	1	3	0	1
LM	As	2012	9	2	6	1	0
LM	As	2012	9	3	7	0	0
LM	As	2012	10	1	73	2	38
LM	As	2012	10	2	28	2	1
LM	As	2012	10	3	16	0	0
LM	As	2012	11	1	31	0	12
LM	As	2012	11	2	68	0	16
LM	As	2012	11	3	29	0	3
LM	As	2012	12	1	10	0	1
LM	As	2012	12	2	10	1	0
LM	As	2012	12	3	6	0	2
LM	As	2012	13	1	4	0	0
LM	As	2012	13	2	0	0	0
LM	As	2012	13	3	0	0	0
LM	As	2012	14	1	5	0	1
LM	As	2012	14	2	5	0	0
LM	As	2012	14	3	10	1	5
LM	As	2012	15	1	17	0	1
LM	As	2012	15	2	16	0	3
LM	As	2012	15	3	12	0	0
LM	As	2012	16	1	22	1	3
LM	As	2012	16	2	27	0	17
LM	As	2012	16	3	2	0	2
LM	As	2012	17	1	4	1	0
LM	As	2012	17	2	3	0	0
LM	As	2012	17	3	11	2	2
LM	As	2012	18	1	7	0	0
LM	As	2012	18	2	4	0	0
LM	As	2012	18	3	4	0	4
LM	As	2012	19	1	19	2	7
LM	As	2012	19	2	5	0	0
LM	As	2012	19	3	9	0	0
LM	As	2012	20	1	NA	NA	NA
LM	As	2012	20	2	NA	NA	NA
LM	As	2012	20	3	NA	NA	NA
LM	As	2012	21	1	20	0	8
LM	As	2012	21	2	14	0	1
LM	As	2012	21	3	5	0	0
LM	As	2012	22	1	26	0	0
LM	As	2012	22	2	9	0	2
LM	As	2012	22	3	11	0	0
LM	As	2012	23	1	13	0	0
LM	As	2012	23	2	29	0	5
LM	As	2012	23	3	17	4	1
LM	As	2012	24	1	2	0	0
LM	As	2012	24	2	5	0	1
LM	As	2012	24	3	7	0	2
LM	As	2012	25	1	5	0	1
LM	As	2012	25	2	5	1	0
LM	As	2012	25	3	0	0	0
PN	As	2012	1	1	8	1	0
PN	As	2012	1	2	8	0	0
PN	As	2012	1	3	24	0	1
PN	As	2012	2	1	6	1	0
PN	As	2012	2	2	28	1	0
PN	As	2012	2	3	10	1	1
PN	As	2012	3	1	22	2	1
PN	As	2012	3	2	34	1	1
PN	As	2012	3	3	27	0	1
PN	As	2012	4	1	45	3	1
PN	As	2012	4	2	30	1	0
PN	As	2012	4	3	22	3	0
PN	As	2012	5	1	41	1	5
PN	As	2012	5	2	43	4	3
PN	As	2012	5	3	48	1	3
PN	As	2012	6	1	26	1	1
PN	As	2012	6	2	24	1	3
PN	As	2012	6	3	24	2	1
PN	As	2012	7	1	23	2	1
PN	As	2012	7	2	11	0	0
PN	As	2012	7	3	35	2	0
PN	As	2012	8	1	24	1	0
PN	As	2012	8	2	8	0	0
PN	As	2012	8	3	15	2	0
PN	As	2012	9	1	17	0	1
PN	As	2012	9	2	14	2	1
PN	As	2012	9	3	17	0	0
PN	As	2012	10	1	21	0	2
PN	As	2012	10	2	25	3	2
PN	As	2012	10	3	19	1	0
PN	As	2012	11	1	42	3	0
PN	As	2012	11	2	28	0	0
PN	As	2012	11	3	38	2	2
PN	As	2012	12	1	23	1	0
PN	As	2012	12	2	42	0	4
PN	As	2012	12	3	25	1	4
PN	As	2012	13	1	37	0	0
PN	As	2012	13	2	35	5	1
PN	As	2012	13	3	30	0	0
PN	As	2012	14	1	26	0	0
PN	As	2012	14	2	24	1	2
PN	As	2012	14	3	17	0	2
PN	As	2012	15	1	28	3	0
PN	As	2012	15	2	36	2	0
PN	As	2012	15	3	15	0	0
PN	As	2012	16	1	21	0	1
PN	As	2012	16	2	23	2	0
PN	As	2012	16	3	9	1	1
PN	As	2012	17	1	34	1	0
PN	As	2012	17	2	36	1	2
PN	As	2012	17	3	25	0	0
PN	As	2012	18	1	28	1	2
PN	As	2012	18	2	28	3	1
PN	As	2012	18	3	49	7	0
PN	As	2012	19	1	35	4	1
PN	As	2012	19	2	46	3	0
PN	As	2012	19	3	39	5	0
PN	As	2012	20	1	12	0	1
PN	As	2012	20	2	22	1	0
PN	As	2012	20	3	7	0	0
PN	As	2012	21	1	14	0	0
PN	As	2012	21	2	16	0	0
PN	As	2012	21	3	10	1	1
PN	As	2012	22	1	29	2	1
PN	As	2012	22	2	35	5	0
PN	As	2012	22	3	6	1	0
PN	As	2012	23	1	40	4	2
PN	As	2012	23	2	37	2	1
PN	As	2012	23	3	53	3	0
PN	As	2012	24	1	20	2	0
PN	As	2012	24	2	12	2	0
PN	As	2012	24	3	16	2	1
PN	As	2012	25	1	42	4	1
PN	As	2012	25	2	45	1	1
PN	As	2012	25	3	44	2	0
MR	As	2012	1	1	4	0	0
MR	As	2012	1	2	3	0	1
MR	As	2012	1	3	3	0	2
MR	As	2012	2	1	7	0	2
MR	As	2012	2	2	1	0	0
MR	As	2012	2	3	2	0	0
MR	As	2012	3	1	12	0	4
MR	As	2012	3	2	9	0	1
MR	As	2012	3	3	7	0	0
MR	As	2012	4	1	10	0	0
MR	As	2012	4	2	11	1	0
MR	As	2012	4	3	10	0	1
MR	As	2012	5	1	0	0	0
MR	As	2012	5	2	4	0	0
MR	As	2012	5	3	6	0	0
MR	As	2012	6	1	12	0	0
MR	As	2012	6	2	30	2	3
MR	As	2012	6	3	7	0	0
MR	As	2012	7	1	11	0	2
MR	As	2012	7	2	10	0	2
MR	As	2012	7	3	12	2	3
MR	As	2012	8	1	14	1	2
MR	As	2012	8	2	5	0	1
MR	As	2012	8	3	3	0	0
MR	As	2012	9	1	21	0	1
MR	As	2012	9	2	27	2	0
MR	As	2012	9	3	19	0	0
MR	As	2012	10	1	12	1	0
MR	As	2012	10	2	13	0	6
MR	As	2012	10	3	7	0	0
MR	As	2012	11	1	25	0	6
MR	As	2012	11	2	44	1	1
MR	As	2012	11	3	25	0	1
MR	As	2012	12	1	11	0	0
MR	As	2012	12	2	32	0	0
MR	As	2012	12	3	40	0	4
MR	As	2012	13	1	16	1	5
MR	As	2012	13	2	10	1	4
MR	As	2012	13	3	27	1	3
MR	As	2012	14	1	3	1	1
MR	As	2012	14	2	7	0	1
MR	As	2012	14	3	17	0	0
MR	As	2012	15	1	39	2	4
MR	As	2012	15	2	19	0	1
MR	As	2012	15	3	3	0	0
MR	As	2012	16	1	27	3	1
MR	As	2012	16	2	24	2	8
MR	As	2012	16	3	30	0	6
MR	As	2012	17	1	20	0	1
MR	As	2012	17	2	1	0	0
MR	As	2012	17	3	5	0	0
MR	As	2012	18	1	22	0	2
MR	As	2012	18	2	20	0	1
MR	As	2012	18	3	45	1	2
MR	As	2012	19	1	13	0	0
MR	As	2012	19	2	17	1	1
MR	As	2012	19	3	9	0	0
MR	As	2012	20	1	56	2	3
MR	As	2012	20	2	8	0	0
MR	As	2012	20	3	11	0	1
MR	As	2012	21	1	17	0	1
MR	As	2012	21	2	34	0	3
MR	As	2012	21	3	16	0	1
MR	As	2012	22	1	12	2	0
MR	As	2012	22	2	13	0	7
MR	As	2012	22	3	7	1	0
MR	As	2012	23	1	9	0	3
MR	As	2012	23	2	9	0	3
MR	As	2012	23	3	12	0	0
MR	As	2012	24	1	22	0	7
MR	As	2012	24	2	18	0	4
MR	As	2012	24	3	6	0	0
MR	As	2012	25	1	3	0	0
MR	As	2012	25	2	21	0	9
MR	As	2012	25	3	8	1	1
FF	As	2012	1	1	NA	NA	NA
FF	As	2012	1	2	1	1	0
FF	As	2012	1	3	NA	NA	NA
FF	As	2012	2	1	0	0	0
FF	As	2012	2	2	5	1	4
FF	As	2012	2	3	NA	NA	NA
FF	As	2012	3	1	NA	NA	NA
FF	As	2012	3	2	NA	NA	NA
FF	As	2012	3	3	NA	NA	NA
FF	As	2012	4	1	NA	NA	NA
FF	As	2012	4	2	NA	NA	NA
FF	As	2012	4	3	NA	NA	NA
FF	As	2012	5	1	NA	NA	NA
FF	As	2012	5	2	NA	NA	NA
FF	As	2012	5	3	NA	NA	NA
FF	As	2012	6	1	NA	NA	NA
FF	As	2012	6	2	NA	NA	NA
FF	As	2012	6	3	NA	NA	NA
FF	As	2012	7	1	NA	NA	NA
FF	As	2012	7	2	NA	NA	NA
FF	As	2012	7	3	NA	NA	NA
FF	As	2012	8	1	NA	NA	NA
FF	As	2012	8	2	NA	NA	NA
FF	As	2012	8	3	NA	NA	NA
FF	As	2012	9	1	2	0	2
FF	As	2012	9	2	3	2	1
FF	As	2012	9	3	NA	NA	NA
FF	As	2012	10	1	NA	NA	NA
FF	As	2012	10	2	NA	NA	NA
FF	As	2012	10	3	NA	NA	NA
FF	As	2012	11	1	9	0	4
FF	As	2012	11	2	13	0	5
FF	As	2012	11	3	NA	NA	NA
FF	As	2012	12	1	NA	NA	NA
FF	As	2012	12	2	0	0	0
FF	As	2012	12	3	NA	NA	NA
FF	As	2012	13	1	NA	NA	NA
FF	As	2012	13	2	4	0	2
FF	As	2012	13	3	6	1	4
FF	As	2012	14	1	NA	NA	NA
FF	As	2012	14	2	3	1	1
FF	As	2012	14	3	4	2	2
FF	As	2012	15	1	84	1	6
FF	As	2012	15	2	4	1	3
FF	As	2012	15	3	3	0	2
FF	As	2012	16	1	7	0	2
FF	As	2012	16	2	6	3	3
FF	As	2012	16	3	2	0	0
FF	As	2012	17	1	9	1	3
FF	As	2012	17	2	0	0	0
FF	As	2012	17	3	9	0	2
FF	As	2012	18	1	NA	NA	NA
FF	As	2012	18	2	NA	NA	NA
FF	As	2012	18	3	22	9	1
FF	As	2012	19	1	NA	NA	NA
FF	As	2012	19	2	2	0	1
FF	As	2012	19	3	5	0	1
FF	As	2012	20	1	1	0	0
FF	As	2012	20	2	0	0	0
FF	As	2012	20	3	NA	NA	NA
FF	As	2012	21	1	NA	NA	NA
FF	As	2012	21	2	NA	NA	NA
FF	As	2012	21	3	NA	NA	NA
FF	As	2012	22	1	6	2	3
FF	As	2012	22	2	3	0	2
FF	As	2012	22	3	0	0	0
FF	As	2012	23	1	NA	NA	NA
FF	As	2012	23	2	4	1	1
FF	As	2012	23	3	3	1	2
FF	As	2012	24	1	3	0	0
FF	As	2012	24	2	1	0	0
FF	As	2012	24	3	0	0	0
FF	As	2012	25	1	0	0	0
FF	As	2012	25	2	2	0	2
FF	As	2012	25	3	0	0	0
VV	Ap	2012	1	1	5	2	0
VV	Ap	2012	1	2	6	1	1
VV	Ap	2012	1	3	2	2	0
VV	Ap	2012	2	1	21	3	0
VV	Ap	2012	2	2	20	0	0
VV	Ap	2012	2	3	32	2	0
VV	Ap	2012	3	1	20	3	2
VV	Ap	2012	3	2	49	3	2
VV	Ap	2012	3	3	34	2	0
VV	Ap	2012	4	1	5	1	1
VV	Ap	2012	4	2	2	2	0
VV	Ap	2012	4	3	10	0	0
VV	Ap	2012	5	1	4	2	0
VV	Ap	2012	5	2	0	0	0
VV	Ap	2012	5	3	0	0	0
VV	Ap	2012	6	1	7	2	0
VV	Ap	2012	6	2	12	2	0
VV	Ap	2012	6	3	7	1	0
VV	Ap	2012	7	1	14	7	3
VV	Ap	2012	7	2	12	4	1
VV	Ap	2012	7	3	29	12	1
VV	Ap	2012	8	1	8	3	0
VV	Ap	2012	8	2	5	0	0
VV	Ap	2012	8	3	8	1	0
VV	Ap	2012	9	1	5	0	0
VV	Ap	2012	9	2	3	1	0
VV	Ap	2012	9	3	2	0	0
VV	Ap	2012	10	1	35	12	0
VV	Ap	2012	10	2	27	5	3
VV	Ap	2012	10	3	11	0	0
VV	Ap	2012	11	1	55	14	1
VV	Ap	2012	11	2	22	4	0
VV	Ap	2012	11	3	25	9	0
VV	Ap	2012	12	1	2	1	0
VV	Ap	2012	12	2	11	2	0
VV	Ap	2012	12	3	6	1	0
VV	Ap	2012	13	1	1	1	0
VV	Ap	2012	13	2	2	1	0
VV	Ap	2012	13	3	7	1	0
VV	Ap	2012	14	1	4	1	2
VV	Ap	2012	14	2	2	1	0
VV	Ap	2012	14	3	3	0	0
VV	Ap	2012	15	1	2	0	0
VV	Ap	2012	15	2	9	1	0
VV	Ap	2012	15	3	2	0	0
VV	Ap	2012	16	1	18	4	0
VV	Ap	2012	16	2	13	2	0
VV	Ap	2012	16	3	17	7	0
VV	Ap	2012	17	1	1	0	0
VV	Ap	2012	17	2	1	0	0
VV	Ap	2012	17	3	6	0	0
VV	Ap	2012	18	1	6	1	0
VV	Ap	2012	18	2	6	1	0
VV	Ap	2012	18	3	11	1	0
VV	Ap	2012	19	1	1	0	0
VV	Ap	2012	19	2	0	0	0
VV	Ap	2012	19	3	3	0	0
VV	Ap	2012	20	1	1	0	0
VV	Ap	2012	20	2	0	0	0
VV	Ap	2012	20	3	0	0	0
VV	Ap	2012	21	1	5	1	0
VV	Ap	2012	21	2	15	6	1
VV	Ap	2012	21	3	21	2	1
VV	Ap	2012	22	1	3	0	0
VV	Ap	2012	22	2	9	1	0
VV	Ap	2012	22	3	5	0	0
VV	Ap	2012	23	1	2	2	0
VV	Ap	2012	23	2	1	0	0
VV	Ap	2012	23	3	1	0	0
VV	Ap	2012	24	1	4	0	0
VV	Ap	2012	24	2	5	1	0
VV	Ap	2012	24	3	4	0	0
VV	Ap	2012	25	1	8	1	0
VV	Ap	2012	25	2	50	10	4
VV	Ap	2012	25	3	18	3	1
DL	Ap	2012	1	1	NA	NA	NA
DL	Ap	2012	1	2	NA	NA	NA
DL	Ap	2012	1	3	NA	NA	NA
DL	Ap	2012	2	1	NA	NA	NA
DL	Ap	2012	2	2	NA	NA	NA
DL	Ap	2012	2	3	NA	NA	NA
DL	Ap	2012	3	1	8	0	6
DL	Ap	2012	3	2	6	0	5
DL	Ap	2012	3	3	3	0	2
DL	Ap	2012	4	1	19	1	11
DL	Ap	2012	4	2	2	0	2
DL	Ap	2012	4	3	17	0	12
DL	Ap	2012	5	1	1	0	1
DL	Ap	2012	5	2	2	0	1
DL	Ap	2012	5	3	26	1	19
DL	Ap	2012	6	1	20	3	7
DL	Ap	2012	6	2	23	1	8
DL	Ap	2012	6	3	37	9	22
DL	Ap	2012	7	1	1	0	0
DL	Ap	2012	7	2	7	2	3
DL	Ap	2012	7	3	0	0	0
DL	Ap	2012	8	1	15	3	9
DL	Ap	2012	8	2	4	1	1
DL	Ap	2012	8	3	24	8	13
DL	Ap	2012	9	1	18	5	10
DL	Ap	2012	9	2	3	0	1
DL	Ap	2012	9	3	6	0	2
DL	Ap	2012	10	1	22	1	10
DL	Ap	2012	10	2	6	1	4
DL	Ap	2012	10	3	4	1	2
DL	Ap	2012	11	1	1	0	1
DL	Ap	2012	11	2	12	1	3
DL	Ap	2012	11	3	3	0	1
DL	Ap	2012	12	1	0	0	0
DL	Ap	2012	12	2	16	1	8
DL	Ap	2012	12	3	16	1	5
DL	Ap	2012	13	1	4	1	2
DL	Ap	2012	13	2	2	0	1
DL	Ap	2012	13	3	2	0	2
DL	Ap	2012	14	1	12	3	2
DL	Ap	2012	14	2	11	0	6
DL	Ap	2012	14	3	10	0	8
DL	Ap	2012	15	1	2	0	1
DL	Ap	2012	15	2	6	0	4
DL	Ap	2012	15	3	1	0	1
DL	Ap	2012	16	1	41	1	25
DL	Ap	2012	16	2	15	0	13
DL	Ap	2012	16	3	17	0	15
DL	Ap	2012	17	1	3	0	2
DL	Ap	2012	17	2	9	1	6
DL	Ap	2012	17	3	4	0	1
DL	Ap	2012	18	1	11	0	6
DL	Ap	2012	18	2	11	1	7
DL	Ap	2012	18	3	5	0	3
DL	Ap	2012	19	1	46	3	34
DL	Ap	2012	19	2	32	0	19
DL	Ap	2012	19	3	15	0	12
DL	Ap	2012	20	1	17	4	6
DL	Ap	2012	20	2	17	3	11
DL	Ap	2012	20	3	5	1	2
DL	Ap	2012	21	1	9	3	5
DL	Ap	2012	21	2	1	0	1
DL	Ap	2012	21	3	12	0	2
DL	Ap	2012	22	1	0	0	0
DL	Ap	2012	22	2	0	0	0
DL	Ap	2012	22	3	2	0	0
DL	Ap	2012	23	1	14	0	5
DL	Ap	2012	23	2	15	10	3
DL	Ap	2012	23	3	84	0	13
DL	Ap	2012	24	1	3	0	2
DL	Ap	2012	24	2	0	0	0
DL	Ap	2012	24	3	1	0	0
DL	Ap	2012	25	1	11	1	9
DL	Ap	2012	25	2	7	0	7
DL	Ap	2012	25	3	17	0	11
RD	Ap	2012	1	1	0	0	0
RD	Ap	2012	1	2	12	0	1
RD	Ap	2012	1	3	2	0	1
RD	Ap	2012	2	1	0	0	0
RD	Ap	2012	2	2	0	0	0
RD	Ap	2012	2	3	8	5	0
RD	Ap	2012	3	1	3	1	2
RD	Ap	2012	3	2	13	0	3
RD	Ap	2012	3	3	25	2	14
RD	Ap	2012	4	1	4	0	1
RD	Ap	2012	4	2	3	0	0
RD	Ap	2012	4	3	7	0	3
RD	Ap	2012	5	1	9	6	0
RD	Ap	2012	5	2	7	0	0
RD	Ap	2012	5	3	11	0	1
RD	Ap	2012	6	1	0	0	0
RD	Ap	2012	6	2	0	0	0
RD	Ap	2012	6	3	1	0	0
RD	Ap	2012	7	1	0	0	0
RD	Ap	2012	7	2	9	0	2
RD	Ap	2012	7	3	1	0	0
RD	Ap	2012	8	1	1	1	0
RD	Ap	2012	8	2	2	0	0
RD	Ap	2012	8	3	0	0	0
RD	Ap	2012	9	1	0	0	0
RD	Ap	2012	9	2	1	0	0
RD	Ap	2012	9	3	0	0	0
RD	Ap	2012	10	1	0	0	0
RD	Ap	2012	10	2	6	0	1
RD	Ap	2012	10	3	2	0	1
RD	Ap	2012	11	1	3	1	1
RD	Ap	2012	11	2	0	0	0
RD	Ap	2012	11	3	1	1	0
RD	Ap	2012	12	1	1	0	0
RD	Ap	2012	12	2	3	0	1
RD	Ap	2012	12	3	14	0	4
RD	Ap	2012	13	1	0	0	0
RD	Ap	2012	13	2	1	0	0
RD	Ap	2012	13	3	0	0	0
RD	Ap	2012	14	1	3	0	1
RD	Ap	2012	14	2	2	0	0
RD	Ap	2012	14	3	1	0	0
RD	Ap	2012	15	1	0	0	0
RD	Ap	2012	15	2	1	0	0
RD	Ap	2012	15	3	12	4	8
RD	Ap	2012	16	1	2	0	1
RD	Ap	2012	16	2	2	0	0
RD	Ap	2012	16	3	0	0	0
RD	Ap	2012	17	1	11	0	3
RD	Ap	2012	17	2	10	1	3
RD	Ap	2012	17	3	11	0	2
RD	Ap	2012	18	1	1	0	0
RD	Ap	2012	18	2	0	0	0
RD	Ap	2012	18	3	NA	NA	NA
RD	Ap	2012	19	1	6	0	3
RD	Ap	2012	19	2	0	0	0
RD	Ap	2012	19	3	6	0	4
RD	Ap	2012	20	1	3	0	2
RD	Ap	2012	20	2	0	0	0
RD	Ap	2012	20	3	0	0	0
RD	Ap	2012	21	1	2	0	1
RD	Ap	2012	21	2	1	0	0
RD	Ap	2012	21	3	0	0	0
RD	Ap	2012	22	1	0	0	0
RD	Ap	2012	22	2	8	4	2
RD	Ap	2012	22	3	5	2	3
RD	Ap	2012	23	1	3	0	1
RD	Ap	2012	23	2	0	0	0
RD	Ap	2012	23	3	1	0	0
RD	Ap	2012	24	1	0	0	0
RD	Ap	2012	24	2	0	0	0
RD	Ap	2012	24	3	0	0	0
RD	Ap	2012	25	1	1	0	0
RD	Ap	2012	25	2	10	1	2
RD	Ap	2012	25	3	9	3	1
IV	Ap	2012	1	1	13	0	9
IV	Ap	2012	1	2	5	0	4
IV	Ap	2012	1	3	28	0	14
IV	Ap	2012	2	1	5	1	3
IV	Ap	2012	2	2	2	0	0
IV	Ap	2012	2	3	5	0	2
IV	Ap	2012	3	1	8	0	5
IV	Ap	2012	3	2	4	0	2
IV	Ap	2012	3	3	19	4	15
IV	Ap	2012	4	1	3	0	2
IV	Ap	2012	4	2	8	0	6
IV	Ap	2012	4	3	6	0	4
IV	Ap	2012	5	1	2	0	0
IV	Ap	2012	5	2	2	0	1
IV	Ap	2012	5	3	4	0	1
IV	Ap	2012	6	1	0	0	0
IV	Ap	2012	6	2	0	0	0
IV	Ap	2012	6	3	2	0	2
IV	Ap	2012	7	1	1	0	1
IV	Ap	2012	7	2	0	0	0
IV	Ap	2012	7	3	0	0	0
IV	Ap	2012	8	1	0	0	0
IV	Ap	2012	8	2	7	0	4
IV	Ap	2012	8	3	1	0	0
IV	Ap	2012	9	1	6	0	2
IV	Ap	2012	9	2	16	0	8
IV	Ap	2012	9	3	4	0	2
IV	Ap	2012	10	1	3	0	0
IV	Ap	2012	10	2	2	0	1
IV	Ap	2012	10	3	2	0	1
IV	Ap	2012	11	1	9	0	2
IV	Ap	2012	11	2	10	0	3
IV	Ap	2012	11	3	1	0	0
IV	Ap	2012	12	1	2	0	1
IV	Ap	2012	12	2	0	0	0
IV	Ap	2012	12	3	0	0	0
IV	Ap	2012	13	1	2	0	2
IV	Ap	2012	13	2	9	0	7
IV	Ap	2012	13	3	3	0	2
IV	Ap	2012	14	1	5	0	2
IV	Ap	2012	14	2	26	1	3
IV	Ap	2012	14	3	4	0	1
IV	Ap	2012	15	1	2	0	0
IV	Ap	2012	15	2	7	0	6
IV	Ap	2012	15	3	3	0	2
IV	Ap	2012	16	1	11	0	4
IV	Ap	2012	16	2	7	0	4
IV	Ap	2012	16	3	5	0	5
IV	Ap	2012	17	1	13	1	7
IV	Ap	2012	17	2	0	0	0
IV	Ap	2012	17	3	2	0	1
IV	Ap	2012	18	1	3	0	1
IV	Ap	2012	18	2	2	0	0
IV	Ap	2012	18	3	3	0	0
IV	Ap	2012	19	1	6	0	1
IV	Ap	2012	19	2	3	0	1
IV	Ap	2012	19	3	2	0	1
IV	Ap	2012	20	1	2	0	2
IV	Ap	2012	20	2	2	0	2
IV	Ap	2012	20	3	2	0	2
IV	Ap	2012	21	1	1	0	0
IV	Ap	2012	21	2	11	0	1
IV	Ap	2012	21	3	4	0	2
IV	Ap	2012	22	1	1	0	0
IV	Ap	2012	22	2	7	0	5
IV	Ap	2012	22	3	5	0	3
IV	Ap	2012	23	1	8	0	3
IV	Ap	2012	23	2	3	0	2
IV	Ap	2012	23	3	4	0	2
IV	Ap	2012	24	1	0	0	0
IV	Ap	2012	24	2	1	0	1
IV	Ap	2012	24	3	2	0	2
IV	Ap	2012	25	1	0	0	0
IV	Ap	2012	25	2	0	0	0
IV	Ap	2012	25	3	16	0	4
SD	Ap	2012	1	1	67	0	12
SD	Ap	2012	1	2	NA	NA	NA
SD	Ap	2012	1	3	NA	NA	NA
SD	Ap	2012	2	1	45	1	12
SD	Ap	2012	2	2	6	1	1
SD	Ap	2012	2	3	NA	NA	NA
SD	Ap	2012	3	1	6	1	0
SD	Ap	2012	3	2	NA	NA	NA
SD	Ap	2012	3	3	NA	NA	NA
SD	Ap	2012	4	1	NA	NA	NA
SD	Ap	2012	4	2	NA	NA	NA
SD	Ap	2012	4	3	NA	NA	NA
SD	Ap	2012	5	1	NA	NA	NA
SD	Ap	2012	5	2	NA	NA	NA
SD	Ap	2012	5	3	NA	NA	NA
SD	Ap	2012	6	1	NA	NA	NA
SD	Ap	2012	6	2	NA	NA	NA
SD	Ap	2012	6	3	NA	NA	NA
SD	Ap	2012	7	1	6	0	1
SD	Ap	2012	7	2	NA	NA	NA
SD	Ap	2012	7	3	NA	NA	NA
SD	Ap	2012	8	1	2	0	0
SD	Ap	2012	8	2	0	0	0
SD	Ap	2012	8	3	8	2	3
SD	Ap	2012	9	1	NA	NA	NA
SD	Ap	2012	9	2	NA	NA	NA
SD	Ap	2012	9	3	NA	NA	NA
SD	Ap	2012	10	1	2	0	0
SD	Ap	2012	10	2	NA	NA	NA
SD	Ap	2012	10	3	4	1	0
SD	Ap	2012	11	1	NA	NA	NA
SD	Ap	2012	11	2	NA	NA	NA
SD	Ap	2012	11	3	NA	NA	NA
SD	Ap	2012	12	1	11	0	4
SD	Ap	2012	12	2	NA	NA	NA
SD	Ap	2012	12	3	NA	NA	NA
SD	Ap	2012	13	1	NA	NA	NA
SD	Ap	2012	13	2	NA	NA	NA
SD	Ap	2012	13	3	12	0	0
SD	Ap	2012	14	1	4	0	0
SD	Ap	2012	14	2	8	1	1
SD	Ap	2012	14	3	12	0	4
SD	Ap	2012	15	1	37	2	0
SD	Ap	2012	15	2	12	0	2
SD	Ap	2012	15	3	29	0	4
SD	Ap	2012	16	1	8	0	1
SD	Ap	2012	16	2	NA	NA	NA
SD	Ap	2012	16	3	32	0	5
SD	Ap	2012	17	1	NA	NA	NA
SD	Ap	2012	17	2	NA	NA	NA
SD	Ap	2012	17	3	NA	NA	NA
SD	Ap	2012	18	1	16	0	1
SD	Ap	2012	18	2	6	0	1
SD	Ap	2012	18	3	NA	NA	NA
SD	Ap	2012	19	1	31	0	2
SD	Ap	2012	19	2	11	3	0
SD	Ap	2012	19	3	11	0	1
SD	Ap	2012	20	1	4	0	1
SD	Ap	2012	20	2	10	0	3
SD	Ap	2012	20	3	4	0	2
SD	Ap	2012	21	1	13	0	0
SD	Ap	2012	21	2	16	0	0
SD	Ap	2012	21	3	15	0	1
SD	Ap	2012	22	1	7	0	0
SD	Ap	2012	22	2	0	0	0
SD	Ap	2012	22	3	5	1	0
SD	Ap	2012	23	1	9	1	0
SD	Ap	2012	23	2	28	7	2
SD	Ap	2012	23	3	6	0	0
SD	Ap	2012	24	1	25	4	0
SD	Ap	2012	24	2	10	5	0
SD	Ap	2012	24	3	6	1	1
SD	Ap	2012	25	1	8	0	0
SD	Ap	2012	25	2	18	0	1
SD	Ap	2012	25	3	14	0	0
FB	Al	2013	1	1	28	1	0
FB	Al	2013	1	2	16	0	6
FB	Al	2013	1	3	NA	NA	NA
FB	Al	2013	2	1	26	0	0
FB	Al	2013	2	2	NA	NA	NA
FB	Al	2013	2	3	NA	NA	NA
FB	Al	2013	3	1	23	0	9
FB	Al	2013	3	2	70	3	25
FB	Al	2013	3	3	30	1	3
FB	Al	2013	4	1	32	0	6
FB	Al	2013	4	2	34	2	16
FB	Al	2013	4	3	NA	NA	NA
FB	Al	2013	5	1	52	5	6
FB	Al	2013	5	2	30	2	9
FB	Al	2013	5	3	46	3	6
FB	Al	2013	6	1	35	3	6
FB	Al	2013	6	2	40	4	8
FB	Al	2013	6	3	39	2	12
FB	Al	2013	7	1	40	1	12
FB	Al	2013	7	2	29	1	14
FB	Al	2013	7	3	48	2	20
FB	Al	2013	8	1	21	0	8
FB	Al	2013	8	2	33	3	12
FB	Al	2013	8	3	27	0	9
FB	Al	2013	9	1	23	0	7
FB	Al	2013	9	2	27	6	12
FB	Al	2013	9	3	22	3	9
FB	Al	2013	10	1	11	0	8
FB	Al	2013	10	2	47	3	15
FB	Al	2013	10	3	25	0	9
FB	Al	2013	11	1	9	0	3
FB	Al	2013	11	2	5	0	1
FB	Al	2013	11	3	24	0	11
FB	Al	2013	12	1	13	2	4
FB	Al	2013	12	2	33	4	15
FB	Al	2013	12	3	30	1	10
FB	Al	2013	13	1	9	0	1
FB	Al	2013	13	2	NA	NA	NA
FB	Al	2013	13	3	NA	NA	NA
FB	Al	2013	14	1	7	1	2
FB	Al	2013	14	2	6	0	2
FB	Al	2013	14	3	10	1	2
FB	Al	2013	15	1	29	0	7
FB	Al	2013	15	2	25	0	9
FB	Al	2013	15	3	15	1	5
FB	Al	2013	16	1	26	0	14
FB	Al	2013	16	2	18	2	7
FB	Al	2013	16	3	25	2	7
FB	Al	2013	17	1	18	0	3
FB	Al	2013	17	2	11	0	2
FB	Al	2013	17	3	4	0	1
FB	Al	2013	18	1	48	12	11
FB	Al	2013	18	2	24	3	3
FB	Al	2013	18	3	NA	NA	NA
FB	Al	2013	19	1	19	0	5
FB	Al	2013	19	2	18	1	6
FB	Al	2013	19	3	NA	NA	NA
FB	Al	2013	20	1	10	0	6
FB	Al	2013	20	2	6	0	1
FB	Al	2013	20	3	14	0	8
FB	Al	2013	21	1	15	0	7
FB	Al	2013	21	2	18	1	8
FB	Al	2013	21	3	11	2	3
FB	Al	2013	22	1	10	1	1
FB	Al	2013	22	2	31	0	12
FB	Al	2013	22	3	30	4	5
FB	Al	2013	23	1	21	7	7
FB	Al	2013	23	2	19	3	9
FB	Al	2013	23	3	14	2	7
FB	Al	2013	24	1	9	0	3
FB	Al	2013	24	2	4	0	0
FB	Al	2013	24	3	5	0	1
FB	Al	2013	25	1	6	1	3
FB	Al	2013	25	2	4	0	0
FB	Al	2013	25	3	NA	NA	NA
MP	Al	2013	1	1	12	0	2
MP	Al	2013	1	2	23	0	7
MP	Al	2013	1	3	7	0	3
MP	Al	2013	2	1	20	1	3
MP	Al	2013	2	2	20	1	9
MP	Al	2013	2	3	7	0	5
MP	Al	2013	3	1	7	1	3
MP	Al	2013	3	2	12	0	7
MP	Al	2013	3	3	5	0	1
MP	Al	2013	4	1	17	0	6
MP	Al	2013	4	2	30	3	16
MP	Al	2013	4	3	36	1	13
MP	Al	2013	5	1	35	1	17
MP	Al	2013	5	2	22	0	8
MP	Al	2013	5	3	24	0	6
MP	Al	2013	6	1	28	0	8
MP	Al	2013	6	2	20	0	8
MP	Al	2013	6	3	16	0	4
MP	Al	2013	7	1	23	0	11
MP	Al	2013	7	2	30	2	7
MP	Al	2013	7	3	28	0	11
MP	Al	2013	8	1	17	0	9
MP	Al	2013	8	2	25	0	3
MP	Al	2013	8	3	32	0	9
MP	Al	2013	9	1	14	0	5
MP	Al	2013	9	2	39	2	5
MP	Al	2013	9	3	23	2	5
MP	Al	2013	10	1	23	0	6
MP	Al	2013	10	2	16	2	6
MP	Al	2013	10	3	25	3	9
MP	Al	2013	11	1	9	1	3
MP	Al	2013	11	2	14	1	4
MP	Al	2013	11	3	22	1	13
MP	Al	2013	12	1	30	10	5
MP	Al	2013	12	2	21	1	6
MP	Al	2013	12	3	42	1	10
MP	Al	2013	13	1	29	2	8
MP	Al	2013	13	2	32	1	7
MP	Al	2013	13	3	35	0	15
MP	Al	2013	14	1	23	1	9
MP	Al	2013	14	2	28	2	6
MP	Al	2013	14	3	35	2	13
MP	Al	2013	15	1	12	2	5
MP	Al	2013	15	2	16	0	7
MP	Al	2013	15	3	21	0	10
MP	Al	2013	16	1	19	2	6
MP	Al	2013	16	2	10	1	5
MP	Al	2013	16	3	10	0	2
MP	Al	2013	17	1	26	1	10
MP	Al	2013	17	2	21	0	6
MP	Al	2013	17	3	22	0	5
MP	Al	2013	18	1	34	0	2
MP	Al	2013	18	2	28	1	9
MP	Al	2013	18	3	17	0	6
MP	Al	2013	19	1	13	2	3
MP	Al	2013	19	2	31	5	15
MP	Al	2013	19	3	18	3	5
MP	Al	2013	20	1	28	3	10
MP	Al	2013	20	2	27	1	6
MP	Al	2013	20	3	49	4	11
MP	Al	2013	21	1	7	2	1
MP	Al	2013	21	2	13	2	8
MP	Al	2013	21	3	15	1	5
MP	Al	2013	22	1	1	0	0
MP	Al	2013	22	2	2	0	1
MP	Al	2013	22	3	17	0	8
MP	Al	2013	23	1	15	0	4
MP	Al	2013	23	2	7	2	3
MP	Al	2013	23	3	10	0	2
MP	Al	2013	24	1	57	1	9
MP	Al	2013	24	2	44	1	18
MP	Al	2013	24	3	38	6	10
MP	Al	2013	25	1	27	2	13
MP	Al	2013	25	2	35	2	9
MP	Al	2013	25	3	26	4	8
AV	Al	2013	1	1	1	0	1
AV	Al	2013	1	2	0	0	0
AV	Al	2013	1	3	1	0	1
AV	Al	2013	2	1	4	0	3
AV	Al	2013	2	2	5	0	3
AV	Al	2013	2	3	6	1	4
AV	Al	2013	3	1	2	0	1
AV	Al	2013	3	2	0	0	0
AV	Al	2013	3	3	1	0	1
AV	Al	2013	4	1	7	3	3
AV	Al	2013	4	2	1	0	1
AV	Al	2013	4	3	0	0	0
AV	Al	2013	5	1	15	2	8
AV	Al	2013	5	2	11	0	8
AV	Al	2013	5	3	9	0	4
AV	Al	2013	6	1	2	1	1
AV	Al	2013	6	2	5	0	2
AV	Al	2013	6	3	0	0	0
AV	Al	2013	7	1	1	0	1
AV	Al	2013	7	2	1	0	0
AV	Al	2013	7	3	6	0	3
AV	Al	2013	8	1	6	2	3
AV	Al	2013	8	2	5	0	4
AV	Al	2013	8	3	7	1	1
AV	Al	2013	9	1	40	5	15
AV	Al	2013	9	2	31	3	6
AV	Al	2013	9	3	19	4	2
AV	Al	2013	10	1	20	3	11
AV	Al	2013	10	2	12	0	4
AV	Al	2013	10	3	14	4	7
AV	Al	2013	11	1	1	0	1
AV	Al	2013	11	2	7	0	1
AV	Al	2013	11	3	7	0	3
AV	Al	2013	12	1	11	0	4
AV	Al	2013	12	2	7	0	2
AV	Al	2013	12	3	11	0	3
AV	Al	2013	13	1	7	1	3
AV	Al	2013	13	2	7	0	3
AV	Al	2013	13	3	9	0	6
AV	Al	2013	14	1	5	0	3
AV	Al	2013	14	2	11	1	5
AV	Al	2013	14	3	9	0	5
AV	Al	2013	15	1	1	0	0
AV	Al	2013	15	2	3	0	0
AV	Al	2013	15	3	3	0	1
AV	Al	2013	16	1	11	0	4
AV	Al	2013	16	2	16	0	7
AV	Al	2013	16	3	0	0	0
AV	Al	2013	17	1	2	0	0
AV	Al	2013	17	2	6	0	2
AV	Al	2013	17	3	6	1	5
AV	Al	2013	18	1	3	0	1
AV	Al	2013	18	2	0	0	0
AV	Al	2013	18	3	4	0	1
AV	Al	2013	19	1	NA	NA	NA
AV	Al	2013	19	2	NA	NA	NA
AV	Al	2013	19	3	NA	NA	NA
AV	Al	2013	20	1	NA	NA	NA
AV	Al	2013	20	2	NA	NA	NA
AV	Al	2013	20	3	NA	NA	NA
AV	Al	2013	21	1	NA	NA	NA
AV	Al	2013	21	2	NA	NA	NA
AV	Al	2013	21	3	NA	NA	NA
AV	Al	2013	22	1	9	0	2
AV	Al	2013	22	2	NA	NA	NA
AV	Al	2013	22	3	NA	NA	NA
AV	Al	2013	23	1	0	0	0
AV	Al	2013	23	2	1	0	0
AV	Al	2013	23	3	1	0	0
AV	Al	2013	24	1	1	0	0
AV	Al	2013	24	2	2	0	1
AV	Al	2013	24	3	0	0	0
AV	Al	2013	25	1	3	0	2
AV	Al	2013	25	2	2	0	0
AV	Al	2013	25	3	5	0	1
WR	Al	2013	1	1	6	0	5
WR	Al	2013	1	2	9	0	9
WR	Al	2013	1	3	2	0	2
WR	Al	2013	2	1	0	0	0
WR	Al	2013	2	2	0	0	0
WR	Al	2013	2	3	0	0	0
WR	Al	2013	3	1	0	0	0
WR	Al	2013	3	2	0	0	0
WR	Al	2013	3	3	1	0	1
WR	Al	2013	4	1	0	0	0
WR	Al	2013	4	2	0	0	0
WR	Al	2013	4	3	0	0	0
WR	Al	2013	5	1	2	0	1
WR	Al	2013	5	2	3	0	3
WR	Al	2013	5	3	0	0	0
WR	Al	2013	6	1	5	0	3
WR	Al	2013	6	2	7	1	5
WR	Al	2013	6	3	0	0	0
WR	Al	2013	7	1	1	0	1
WR	Al	2013	7	2	1	0	1
WR	Al	2013	7	3	0	0	0
WR	Al	2013	8	1	4	2	0
WR	Al	2013	8	2	0	0	0
WR	Al	2013	8	3	0	0	0
WR	Al	2013	9	1	0	0	0
WR	Al	2013	9	2	3	0	3
WR	Al	2013	9	3	0	0	0
WR	Al	2013	10	1	2	0	1
WR	Al	2013	10	2	0	0	0
WR	Al	2013	10	3	1	0	1
WR	Al	2013	11	1	2	0	2
WR	Al	2013	11	2	1	0	0
WR	Al	2013	11	3	0	0	0
WR	Al	2013	12	1	3	0	3
WR	Al	2013	12	2	5	0	4
WR	Al	2013	12	3	2	0	2
WR	Al	2013	13	1	0	0	0
WR	Al	2013	13	2	8	0	7
WR	Al	2013	13	3	1	0	1
WR	Al	2013	14	1	0	0	0
WR	Al	2013	14	2	1	0	0
WR	Al	2013	14	3	2	0	2
WR	Al	2013	15	1	0	0	0
WR	Al	2013	15	2	0	0	0
WR	Al	2013	15	3	4	0	1
WR	Al	2013	16	1	0	0	0
WR	Al	2013	16	2	1	0	0
WR	Al	2013	16	3	2	0	2
WR	Al	2013	17	1	0	0	0
WR	Al	2013	17	2	0	0	0
WR	Al	2013	17	3	0	0	0
WR	Al	2013	18	1	22	0	6
WR	Al	2013	18	2	0	0	0
WR	Al	2013	18	3	30	3	19
WR	Al	2013	19	1	1	0	1
WR	Al	2013	19	2	6	0	3
WR	Al	2013	19	3	3	1	2
WR	Al	2013	20	1	7	0	7
WR	Al	2013	20	2	10	0	4
WR	Al	2013	20	3	20	2	10
WR	Al	2013	21	1	2	0	1
WR	Al	2013	21	2	7	2	4
WR	Al	2013	21	3	19	3	9
WR	Al	2013	22	1	7	0	5
WR	Al	2013	22	2	4	0	3
WR	Al	2013	22	3	6	2	4
WR	Al	2013	23	1	1	0	0
WR	Al	2013	23	2	3	0	3
WR	Al	2013	23	3	0	0	0
WR	Al	2013	24	1	23	1	15
WR	Al	2013	24	2	0	0	0
WR	Al	2013	24	3	4	0	2
WR	Al	2013	25	1	4	0	2
WR	Al	2013	25	2	2	0	1
WR	Al	2013	25	3	9	1	6
VV	Ap	2013	1	1	0	0	0
VV	Ap	2013	1	2	8	0	1
VV	Ap	2013	1	3	9	1	0
VV	Ap	2013	2	1	0	0	0
VV	Ap	2013	2	2	0	0	0
VV	Ap	2013	2	3	0	0	0
VV	Ap	2013	3	1	0	0	0
VV	Ap	2013	3	2	0	0	0
VV	Ap	2013	3	3	NA	NA	NA
VV	Ap	2013	4	1	8	2	3
VV	Ap	2013	4	2	0	0	0
VV	Ap	2013	4	3	5	0	0
VV	Ap	2013	5	1	0	0	0
VV	Ap	2013	5	2	0	0	0
VV	Ap	2013	5	3	0	0	0
VV	Ap	2013	6	1	1	0	0
VV	Ap	2013	6	2	0	0	0
VV	Ap	2013	6	3	1	0	1
VV	Ap	2013	7	1	0	0	0
VV	Ap	2013	7	2	0	0	0
VV	Ap	2013	7	3	0	0	0
VV	Ap	2013	8	1	7	0	1
VV	Ap	2013	8	2	3	0	0
VV	Ap	2013	8	3	2	0	2
VV	Ap	2013	9	1	5	0	0
VV	Ap	2013	9	2	4	0	0
VV	Ap	2013	9	3	15	0	4
VV	Ap	2013	10	1	2	0	2
VV	Ap	2013	10	2	2	0	0
VV	Ap	2013	10	3	6	1	0
VV	Ap	2013	11	1	7	0	1
VV	Ap	2013	11	2	8	0	2
VV	Ap	2013	11	3	7	0	2
VV	Ap	2013	12	1	4	0	0
VV	Ap	2013	12	2	12	0	3
VV	Ap	2013	12	3	0	0	0
VV	Ap	2013	13	1	3	0	0
VV	Ap	2013	13	2	4	0	0
VV	Ap	2013	13	3	3	0	0
VV	Ap	2013	14	1	4	0	2
VV	Ap	2013	14	2	3	0	1
VV	Ap	2013	14	3	4	0	1
VV	Ap	2013	15	1	0	0	0
VV	Ap	2013	15	2	4	0	1
VV	Ap	2013	15	3	8	0	0
VV	Ap	2013	16	1	6	0	3
VV	Ap	2013	16	2	1	0	0
VV	Ap	2013	16	3	4	0	2
VV	Ap	2013	17	1	1	0	1
VV	Ap	2013	17	2	0	0	0
VV	Ap	2013	17	3	4	1	0
VV	Ap	2013	18	1	0	0	0
VV	Ap	2013	18	2	1	0	0
VV	Ap	2013	18	3	2	0	1
VV	Ap	2013	19	1	1	0	0
VV	Ap	2013	19	2	7	0	0
VV	Ap	2013	19	3	4	0	0
VV	Ap	2013	20	1	13	0	1
VV	Ap	2013	20	2	25	0	5
VV	Ap	2013	20	3	9	0	0
VV	Ap	2013	21	1	9	0	0
VV	Ap	2013	21	2	5	1	2
VV	Ap	2013	21	3	4	0	2
VV	Ap	2013	22	1	7	0	0
VV	Ap	2013	22	2	2	0	1
VV	Ap	2013	22	3	8	0	1
VV	Ap	2013	23	1	13	1	2
VV	Ap	2013	23	2	12	1	1
VV	Ap	2013	23	3	7	1	1
VV	Ap	2013	24	1	1	0	1
VV	Ap	2013	24	2	1	1	0
VV	Ap	2013	24	3	2	0	0
VV	Ap	2013	25	1	5	0	1
VV	Ap	2013	25	2	4	0	3
VV	Ap	2013	25	3	3	0	2
DL	Ap	2013	1	1	11	0	0
DL	Ap	2013	1	2	5	0	1
DL	Ap	2013	1	3	5	0	0
DL	Ap	2013	2	1	5	0	0
DL	Ap	2013	2	2	17	0	1
DL	Ap	2013	2	3	4	0	0
DL	Ap	2013	3	1	5	0	0
DL	Ap	2013	3	2	10	0	2
DL	Ap	2013	3	3	6	1	2
DL	Ap	2013	4	1	6	1	2
DL	Ap	2013	4	2	8	0	0
DL	Ap	2013	4	3	5	0	0
DL	Ap	2013	5	1	4	0	1
DL	Ap	2013	5	2	2	0	2
DL	Ap	2013	5	3	3	0	1
DL	Ap	2013	6	1	1	0	0
DL	Ap	2013	6	2	8	1	3
DL	Ap	2013	6	3	2	1	0
DL	Ap	2013	7	1	2	0	0
DL	Ap	2013	7	2	10	0	3
DL	Ap	2013	7	3	10	1	7
DL	Ap	2013	8	1	3	0	2
DL	Ap	2013	8	2	4	2	1
DL	Ap	2013	8	3	8	0	1
DL	Ap	2013	9	1	14	2	3
DL	Ap	2013	9	2	12	1	3
DL	Ap	2013	9	3	12	6	4
DL	Ap	2013	10	1	2	0	1
DL	Ap	2013	10	2	12	0	2
DL	Ap	2013	10	3	9	1	1
DL	Ap	2013	11	1	1	0	0
DL	Ap	2013	11	2	0	0	0
DL	Ap	2013	11	3	4	3	1
DL	Ap	2013	12	1	20	0	14
DL	Ap	2013	12	2	13	0	5
DL	Ap	2013	12	3	2	0	1
DL	Ap	2013	13	1	10	0	4
DL	Ap	2013	13	2	11	2	2
DL	Ap	2013	13	3	11	0	4
DL	Ap	2013	14	1	1	0	1
DL	Ap	2013	14	2	5	4	1
DL	Ap	2013	14	3	5	3	2
DL	Ap	2013	15	1	7	1	4
DL	Ap	2013	15	2	2	0	0
DL	Ap	2013	15	3	0	0	0
DL	Ap	2013	16	1	2	0	2
DL	Ap	2013	16	2	3	0	3
DL	Ap	2013	16	3	6	0	0
DL	Ap	2013	17	1	4	0	2
DL	Ap	2013	17	2	1	0	0
DL	Ap	2013	17	3	6	2	2
DL	Ap	2013	18	1	5	0	5
DL	Ap	2013	18	2	16	0	6
DL	Ap	2013	18	3	18	0	3
DL	Ap	2013	19	1	3	0	2
DL	Ap	2013	19	2	13	3	6
DL	Ap	2013	19	3	2	0	2
DL	Ap	2013	20	1	4	0	2
DL	Ap	2013	20	2	2	0	2
DL	Ap	2013	20	3	11	0	5
DL	Ap	2013	21	1	5	0	4
DL	Ap	2013	21	2	6	3	3
DL	Ap	2013	21	3	10	1	3
DL	Ap	2013	22	1	4	0	2
DL	Ap	2013	22	2	3	0	1
DL	Ap	2013	22	3	5	1	3
DL	Ap	2013	23	1	21	0	1
DL	Ap	2013	23	2	14	0	0
DL	Ap	2013	23	3	20	3	4
DL	Ap	2013	24	1	2	0	1
DL	Ap	2013	24	2	0	0	0
DL	Ap	2013	24	3	2	1	1
DL	Ap	2013	25	1	12	0	2
DL	Ap	2013	25	2	4	0	1
DL	Ap	2013	25	3	6	0	3
RD	Ap	2013	1	1	8	1	0
RD	Ap	2013	1	2	1	0	1
RD	Ap	2013	1	3	0	0	0
RD	Ap	2013	2	1	3	1	1
RD	Ap	2013	2	2	0	0	0
RD	Ap	2013	2	3	0	0	0
RD	Ap	2013	3	1	0	0	0
RD	Ap	2013	3	2	0	0	0
RD	Ap	2013	3	3	0	0	0
RD	Ap	2013	4	1	1	0	0
RD	Ap	2013	4	2	0	0	0
RD	Ap	2013	4	3	0	0	0
RD	Ap	2013	5	1	1	0	0
RD	Ap	2013	5	2	1	0	0
RD	Ap	2013	5	3	1	0	0
RD	Ap	2013	6	1	6	0	1
RD	Ap	2013	6	2	0	0	0
RD	Ap	2013	6	3	NA	NA	NA
RD	Ap	2013	7	1	0	0	0
RD	Ap	2013	7	2	0	0	0
RD	Ap	2013	7	3	0	0	0
RD	Ap	2013	8	1	0	0	0
RD	Ap	2013	8	2	0	0	0
RD	Ap	2013	8	3	0	0	0
RD	Ap	2013	9	1	0	0	0
RD	Ap	2013	9	2	0	0	0
RD	Ap	2013	9	3	0	0	0
RD	Ap	2013	10	1	6	0	1
RD	Ap	2013	10	2	0	0	0
RD	Ap	2013	10	3	0	0	0
RD	Ap	2013	11	1	2	0	0
RD	Ap	2013	11	2	3	0	0
RD	Ap	2013	11	3	0	0	0
RD	Ap	2013	12	1	10	1	3
RD	Ap	2013	12	2	0	0	0
RD	Ap	2013	12	3	0	0	0
RD	Ap	2013	13	1	0	0	0
RD	Ap	2013	13	2	0	0	0
RD	Ap	2013	13	3	0	0	0
RD	Ap	2013	14	1	4	1	1
RD	Ap	2013	14	2	0	0	0
RD	Ap	2013	14	3	0	0	0
RD	Ap	2013	15	1	4	2	0
RD	Ap	2013	15	2	1	0	0
RD	Ap	2013	15	3	0	0	0
RD	Ap	2013	16	1	1	0	0
RD	Ap	2013	16	2	0	0	0
RD	Ap	2013	16	3	0	0	0
RD	Ap	2013	17	1	18	1	3
RD	Ap	2013	17	2	0	0	0
RD	Ap	2013	17	3	0	0	0
RD	Ap	2013	18	1	0	0	0
RD	Ap	2013	18	2	0	0	0
RD	Ap	2013	18	3	0	0	0
RD	Ap	2013	19	1	1	0	1
RD	Ap	2013	19	2	0	0	0
RD	Ap	2013	19	3	0	0	0
RD	Ap	2013	20	1	3	1	2
RD	Ap	2013	20	2	9	3	0
RD	Ap	2013	20	3	3	0	3
RD	Ap	2013	21	1	0	0	0
RD	Ap	2013	21	2	0	0	0
RD	Ap	2013	21	3	0	0	0
RD	Ap	2013	22	1	1	0	0
RD	Ap	2013	22	2	0	0	0
RD	Ap	2013	22	3	0	0	0
RD	Ap	2013	23	1	3	0	1
RD	Ap	2013	23	2	1	0	0
RD	Ap	2013	23	3	6	0	3
RD	Ap	2013	24	1	1	0	1
RD	Ap	2013	24	2	0	0	0
RD	Ap	2013	24	3	2	0	0
RD	Ap	2013	25	1	1	0	0
RD	Ap	2013	25	2	0	0	0
RD	Ap	2013	25	3	0	0	0
IV	Ap	2013	1	1	3	1	2
IV	Ap	2013	1	2	2	0	1
IV	Ap	2013	1	3	0	0	0
IV	Ap	2013	2	1	0	0	0
IV	Ap	2013	2	2	6	0	3
IV	Ap	2013	2	3	0	0	0
IV	Ap	2013	3	1	3	0	3
IV	Ap	2013	3	2	6	0	3
IV	Ap	2013	3	3	NA	NA	NA
IV	Ap	2013	4	1	2	0	1
IV	Ap	2013	4	2	6	3	2
IV	Ap	2013	4	3	2	0	0
IV	Ap	2013	5	1	1	0	0
IV	Ap	2013	5	2	3	0	1
IV	Ap	2013	5	3	2	0	1
IV	Ap	2013	6	1	0	0	0
IV	Ap	2013	6	2	0	0	0
IV	Ap	2013	6	3	0	0	0
IV	Ap	2013	7	1	4	0	1
IV	Ap	2013	7	2	4	0	2
IV	Ap	2013	7	3	3	1	1
IV	Ap	2013	8	1	4	1	2
IV	Ap	2013	8	2	4	0	0
IV	Ap	2013	8	3	1	0	1
IV	Ap	2013	9	1	0	0	0
IV	Ap	2013	9	2	1	0	1
IV	Ap	2013	9	3	0	0	0
IV	Ap	2013	10	1	1	0	1
IV	Ap	2013	10	2	2	0	1
IV	Ap	2013	10	3	0	0	0
IV	Ap	2013	11	1	2	0	2
IV	Ap	2013	11	2	0	0	0
IV	Ap	2013	11	3	4	0	2
IV	Ap	2013	12	1	5	1	0
IV	Ap	2013	12	2	5	1	3
IV	Ap	2013	12	3	1	0	0
IV	Ap	2013	13	1	2	0	0
IV	Ap	2013	13	2	2	0	0
IV	Ap	2013	13	3	0	0	0
IV	Ap	2013	14	1	4	0	0
IV	Ap	2013	14	2	2	0	1
IV	Ap	2013	14	3	8	1	2
IV	Ap	2013	15	1	4	0	1
IV	Ap	2013	15	2	2	1	1
IV	Ap	2013	15	3	1	0	0
IV	Ap	2013	16	1	0	0	0
IV	Ap	2013	16	2	0	0	0
IV	Ap	2013	16	3	0	0	0
IV	Ap	2013	17	1	1	0	0
IV	Ap	2013	17	2	3	0	2
IV	Ap	2013	17	3	1	0	1
IV	Ap	2013	18	1	3	0	2
IV	Ap	2013	18	2	2	1	1
IV	Ap	2013	18	3	0	0	0
IV	Ap	2013	19	1	6	0	4
IV	Ap	2013	19	2	3	0	2
IV	Ap	2013	19	3	0	0	0
IV	Ap	2013	20	1	2	1	1
IV	Ap	2013	20	2	3	0	0
IV	Ap	2013	20	3	4	2	2
IV	Ap	2013	21	1	4	0	3
IV	Ap	2013	21	2	15	1	9
IV	Ap	2013	21	3	2	0	2
IV	Ap	2013	22	1	1	1	0
IV	Ap	2013	22	2	5	0	1
IV	Ap	2013	22	3	1	0	0
IV	Ap	2013	23	1	3	1	2
IV	Ap	2013	23	2	1	0	1
IV	Ap	2013	23	3	5	0	2
IV	Ap	2013	24	1	5	0	2
IV	Ap	2013	24	2	2	0	0
IV	Ap	2013	24	3	3	1	1
IV	Ap	2013	25	1	1	0	1
IV	Ap	2013	25	2	0	0	0
IV	Ap	2013	25	3	1	0	1
LH	As	2013	1	1	22	0	2
LH	As	2013	1	2	15	0	1
LH	As	2013	1	3	30	2	1
LH	As	2013	2	1	20	0	6
LH	As	2013	2	2	18	1	0
LH	As	2013	2	3	12	0	0
LH	As	2013	3	1	14	0	2
LH	As	2013	3	2	25	2	2
LH	As	2013	3	3	16	0	2
LH	As	2013	4	1	19	0	0
LH	As	2013	4	2	20	1	1
LH	As	2013	4	3	29	1	1
LH	As	2013	5	1	27	2	2
LH	As	2013	5	2	29	1	0
LH	As	2013	5	3	27	3	1
LH	As	2013	6	1	45	3	0
LH	As	2013	6	2	41	1	1
LH	As	2013	6	3	29	1	1
LH	As	2013	7	1	10	2	0
LH	As	2013	7	2	8	0	0
LH	As	2013	7	3	15	0	2
LH	As	2013	8	1	12	0	2
LH	As	2013	8	2	34	7	2
LH	As	2013	8	3	33	0	6
LH	As	2013	9	1	19	1	2
LH	As	2013	9	2	23	1	4
LH	As	2013	9	3	16	0	1
LH	As	2013	10	1	22	1	1
LH	As	2013	10	2	4	0	0
LH	As	2013	10	3	25	2	1
LH	As	2013	11	1	11	2	0
LH	As	2013	11	2	7	0	0
LH	As	2013	11	3	11	5	1
LH	As	2013	12	1	15	1	2
LH	As	2013	12	2	3	0	0
LH	As	2013	12	3	5	1	1
LH	As	2013	13	1	17	0	2
LH	As	2013	13	2	36	0	8
LH	As	2013	13	3	41	0	9
LH	As	2013	14	1	7	1	0
LH	As	2013	14	2	2	0	2
LH	As	2013	14	3	11	0	2
LH	As	2013	15	1	9	1	1
LH	As	2013	15	2	12	2	0
LH	As	2013	15	3	15	0	0
LH	As	2013	16	1	16	2	0
LH	As	2013	16	2	22	1	0
LH	As	2013	16	3	13	0	0
LH	As	2013	17	1	25	0	1
LH	As	2013	17	2	29	1	1
LH	As	2013	17	3	26	0	0
LH	As	2013	18	1	10	0	0
LH	As	2013	18	2	18	0	0
LH	As	2013	18	3	22	0	0
LH	As	2013	19	1	25	1	0
LH	As	2013	19	2	24	0	0
LH	As	2013	19	3	16	0	0
LH	As	2013	20	1	35	5	0
LH	As	2013	20	2	28	0	1
LH	As	2013	20	3	NA	NA	NA
LH	As	2013	21	1	35	0	4
LH	As	2013	21	2	23	1	1
LH	As	2013	21	3	33	1	4
LH	As	2013	22	1	38	0	4
LH	As	2013	22	2	30	0	0
LH	As	2013	22	3	20	9	0
LH	As	2013	23	1	42	0	5
LH	As	2013	23	2	50	8	2
LH	As	2013	23	3	52	5	2
LH	As	2013	24	1	49	0	0
LH	As	2013	24	2	43	1	0
LH	As	2013	24	3	63	0	2
LH	As	2013	25	1	9	0	0
LH	As	2013	25	2	23	3	0
LH	As	2013	25	3	22	0	0
LM	As	2013	1	1	23	1	2
LM	As	2013	1	2	13	0	0
LM	As	2013	1	3	22	2	5
LM	As	2013	2	1	22	0	1
LM	As	2013	2	2	26	1	2
LM	As	2013	2	3	31	0	1
LM	As	2013	3	1	28	0	1
LM	As	2013	3	2	4	1	0
LM	As	2013	3	3	25	0	7
LM	As	2013	4	1	19	0	0
LM	As	2013	4	2	47	0	5
LM	As	2013	4	3	36	0	0
LM	As	2013	5	1	36	2	2
LM	As	2013	5	2	46	0	10
LM	As	2013	5	3	38	1	3
LM	As	2013	6	1	18	0	3
LM	As	2013	6	2	19	2	2
LM	As	2013	6	3	19	2	1
LM	As	2013	7	1	72	2	8
LM	As	2013	7	2	36	3	3
LM	As	2013	7	3	62	3	10
LM	As	2013	8	1	40	1	4
LM	As	2013	8	2	0	0	0
LM	As	2013	8	3	52	1	3
LM	As	2013	9	1	30	0	4
LM	As	2013	9	2	20	1	1
LM	As	2013	9	3	21	2	2
LM	As	2013	10	1	15	3	3
LM	As	2013	10	2	30	1	3
LM	As	2013	10	3	16	0	0
LM	As	2013	11	1	44	1	2
LM	As	2013	11	2	28	1	0
LM	As	2013	11	3	33	6	1
LM	As	2013	12	1	38	1	3
LM	As	2013	12	2	0	0	0
LM	As	2013	12	3	4	0	0
LM	As	2013	13	1	21	0	2
LM	As	2013	13	2	40	0	7
LM	As	2013	13	3	25	0	3
LM	As	2013	14	1	24	0	7
LM	As	2013	14	2	8	1	5
LM	As	2013	14	3	7	1	2
LM	As	2013	15	1	22	2	0
LM	As	2013	15	2	22	0	1
LM	As	2013	15	3	22	1	0
LM	As	2013	16	1	43	3	3
LM	As	2013	16	2	30	0	1
LM	As	2013	16	3	28	1	4
LM	As	2013	17	1	46	0	8
LM	As	2013	17	2	8	2	0
LM	As	2013	17	3	17	0	1
LM	As	2013	18	1	26	0	6
LM	As	2013	18	2	13	0	4
LM	As	2013	18	3	32	4	0
LM	As	2013	19	1	58	0	3
LM	As	2013	19	2	15	1	2
LM	As	2013	19	3	45	0	5
LM	As	2013	20	1	54	0	2
LM	As	2013	20	2	35	0	6
LM	As	2013	20	3	35	1	2
LM	As	2013	21	1	34	1	4
LM	As	2013	21	2	50	2	3
LM	As	2013	21	3	37	1	3
LM	As	2013	22	1	45	0	3
LM	As	2013	22	2	40	2	2
LM	As	2013	22	3	28	0	0
LM	As	2013	23	1	26	4	0
LM	As	2013	23	2	20	0	2
LM	As	2013	23	3	51	2	3
LM	As	2013	24	1	30	10	1
LM	As	2013	24	2	39	2	3
LM	As	2013	24	3	7	1	0
LM	As	2013	25	1	37	0	3
LM	As	2013	25	2	13	0	3
LM	As	2013	25	3	44	5	1
PN	As	2013	1	1	0	0	0
PN	As	2013	1	2	6	0	2
PN	As	2013	1	3	14	4	0
PN	As	2013	2	1	17	2	4
PN	As	2013	2	2	16	1	1
PN	As	2013	2	3	5	1	0
PN	As	2013	3	1	14	0	1
PN	As	2013	3	2	21	0	2
PN	As	2013	3	3	23	2	6
PN	As	2013	4	1	24	1	3
PN	As	2013	4	2	14	1	4
PN	As	2013	4	3	6	1	0
PN	As	2013	5	1	17	3	2
PN	As	2013	5	2	13	2	1
PN	As	2013	5	3	14	1	2
PN	As	2013	6	1	24	4	2
PN	As	2013	6	2	17	2	0
PN	As	2013	6	3	NA	NA	NA
PN	As	2013	7	1	32	13	5
PN	As	2013	7	2	19	2	2
PN	As	2013	7	3	30	3	2
PN	As	2013	8	1	18	1	2
PN	As	2013	8	2	18	6	0
PN	As	2013	8	3	2	0	1
PN	As	2013	9	1	13	0	0
PN	As	2013	9	2	0	0	0
PN	As	2013	9	3	22	2	1
PN	As	2013	10	1	2	0	1
PN	As	2013	10	2	26	3	6
PN	As	2013	10	3	14	2	5
PN	As	2013	11	1	21	2	2
PN	As	2013	11	2	23	2	2
PN	As	2013	11	3	38	9	2
PN	As	2013	12	1	2	0	0
PN	As	2013	12	2	22	2	0
PN	As	2013	12	3	20	3	5
PN	As	2013	13	1	12	1	0
PN	As	2013	13	2	12	5	0
PN	As	2013	13	3	11	2	0
PN	As	2013	14	1	13	3	1
PN	As	2013	14	2	NA	NA	NA
PN	As	2013	14	3	NA	NA	NA
PN	As	2013	15	1	24	3	3
PN	As	2013	15	2	55	3	12
PN	As	2013	15	3	9	0	3
PN	As	2013	16	1	7	0	2
PN	As	2013	16	2	9	1	3
PN	As	2013	16	3	20	1	2
PN	As	2013	17	1	23	0	3
PN	As	2013	17	2	19	5	3
PN	As	2013	17	3	10	1	0
PN	As	2013	18	1	41	5	3
PN	As	2013	18	2	27	0	5
PN	As	2013	18	3	35	5	2
PN	As	2013	19	1	28	5	2
PN	As	2013	19	2	24	2	2
PN	As	2013	19	3	29	2	9
PN	As	2013	20	1	34	4	3
PN	As	2013	20	2	18	0	2
PN	As	2013	20	3	14	0	1
PN	As	2013	21	1	32	2	3
PN	As	2013	21	2	15	1	2
PN	As	2013	21	3	31	1	5
PN	As	2013	22	1	16	3	1
PN	As	2013	22	2	13	1	5
PN	As	2013	22	3	NA	NA	NA
PN	As	2013	23	1	5	1	0
PN	As	2013	23	2	11	3	0
PN	As	2013	23	3	12	0	1
PN	As	2013	24	1	20	3	1
PN	As	2013	24	2	16	0	5
PN	As	2013	24	3	19	1	0
PN	As	2013	25	1	9	0	0
PN	As	2013	25	2	16	0	5
PN	As	2013	25	3	15	1	5
MR	As	2013	1	1	5	0	2
MR	As	2013	1	2	17	0	1
MR	As	2013	1	3	4	0	0
MR	As	2013	2	1	19	0	0
MR	As	2013	2	2	7	0	3
MR	As	2013	2	3	9	1	2
MR	As	2013	3	1	4	1	0
MR	As	2013	3	2	6	1	0
MR	As	2013	3	3	4	0	0
MR	As	2013	4	1	5	0	2
MR	As	2013	4	2	5	0	0
MR	As	2013	4	3	2	0	2
MR	As	2013	5	1	5	0	1
MR	As	2013	5	2	15	0	1
MR	As	2013	5	3	12	1	1
MR	As	2013	6	1	51	1	1
MR	As	2013	6	2	4	0	1
MR	As	2013	6	3	11	0	0
MR	As	2013	7	1	20	0	1
MR	As	2013	7	2	18	1	0
MR	As	2013	7	3	11	1	3
MR	As	2013	8	1	22	0	3
MR	As	2013	8	2	22	0	1
MR	As	2013	8	3	15	0	0
MR	As	2013	9	1	15	0	0
MR	As	2013	9	2	21	0	0
MR	As	2013	9	3	12	1	1
MR	As	2013	10	1	14	0	1
MR	As	2013	10	2	5	0	0
MR	As	2013	10	3	19	0	0
MR	As	2013	11	1	40	0	3
MR	As	2013	11	2	0	0	0
MR	As	2013	11	3	NA	NA	NA
MR	As	2013	12	1	10	0	0
MR	As	2013	12	2	8	0	0
MR	As	2013	12	3	3	1	0
MR	As	2013	13	1	11	0	0
MR	As	2013	13	2	11	0	0
MR	As	2013	13	3	8	0	1
MR	As	2013	14	1	1	0	0
MR	As	2013	14	2	6	0	0
MR	As	2013	14	3	13	0	0
MR	As	2013	15	1	16	0	1
MR	As	2013	15	2	9	0	0
MR	As	2013	15	3	6	0	0
MR	As	2013	16	1	36	0	0
MR	As	2013	16	2	20	0	1
MR	As	2013	16	3	32	1	4
MR	As	2013	17	1	31	2	6
MR	As	2013	17	2	60	2	3
MR	As	2013	17	3	27	1	1
MR	As	2013	18	1	20	0	2
MR	As	2013	18	2	3	1	0
MR	As	2013	18	3	10	0	0
MR	As	2013	19	1	6	0	1
MR	As	2013	19	2	22	0	1
MR	As	2013	19	3	1	0	0
MR	As	2013	20	1	1	0	1
MR	As	2013	20	2	12	0	1
MR	As	2013	20	3	10	0	1
MR	As	2013	21	1	5	1	1
MR	As	2013	21	2	12	0	0
MR	As	2013	21	3	4	0	1
MR	As	2013	22	1	12	0	3
MR	As	2013	22	2	17	1	3
MR	As	2013	22	3	17	1	3
MR	As	2013	23	1	4	0	1
MR	As	2013	23	2	23	1	3
MR	As	2013	23	3	10	0	0
MR	As	2013	24	1	14	0	2
MR	As	2013	24	2	9	0	0
MR	As	2013	24	3	6	0	1
MR	As	2013	25	1	10	0	1
MR	As	2013	25	2	1	0	0
MR	As	2013	25	3	16	2	0

## Sheet: Population SR
Site	Species	Year	Sample	Diameter	Density	NoPorG	OnlyG	OnlyP	PandG	SeedC	Aborted	Predated
AV	Al	2013	1	147	1	0	0	0	1	1	0	1
AV	Al	2013	2	46	2	0	0	0	2	3	0	1
AV	Al	2013	3	48	4	0	2	0	2	2	0	2
AV	Al	2013	4	53	6	1	2	0	3	8	0	5
AV	Al	2013	5	84	2	0	0	0	2	17	1	8
AV	Al	2013	6	78	3	0	1	0	2	4	0	2
AV	Al	2013	7	44	4	0	0	0	4	5	0	1
AV	Al	2013	8	154	1	0	0	0	1	6	1	0
AV	Al	2013	9	121	3	0	1	0	2	2	0	1
AV	Al	2013	10	45	3	0	0	0	3	5	0	1
AV	Al	2013	11	37	4	0	1	0	3	0	0	0
AV	Al	2013	12	21	5	1	1	0	3	15	1	4
AV	Al	2013	13	117	1	0	0	0	1	27	2	6
AV	Al	2013	14	80	3	0	1	0	2	NA	NA	NA
AV	Al	2013	15	82	4	0	1	0	3	0	0	0
AV	Al	2013	16	90	5	0	2	0	3	9	0	0
AV	Al	2013	17	73	9	0	5	0	4	4	0	2
AV	Al	2013	18	111	3	0	1	0	2	7	0	4
AV	Al	2013	19	113	3	0	1	0	2	11	0	7
AV	Al	2013	20	72	8	0	2	0	6	1	0	1
AV	Al	2013	21	64	6	0	2	0	4	2	0	1
AV	Al	2013	22	69	11	0	2	0	9	2	0	1
AV	Al	2013	23	66	4	0	1	0	3	1	0	0
AV	Al	2013	24	144	1	0	0	0	1	0	0	0
AV	Al	2013	25	160	1	0	0	0	1	0	0	0
AV	Al	2013	26	67	3	0	1	0	2	5	0	1
AV	Al	2013	27	70	3	0	2	0	1	1	0	1
AV	Al	2013	28	90	3	0	0	0	3	1	0	0
AV	Al	2013	29	70	4	0	1	0	3	3	0	0
AV	Al	2013	30	11	5	0	1	0	4	NA	NA	NA
LH	As	2013	1	146	1	0	0	0	1	12	0	1
LH	As	2013	2	99	1	0	0	0	1	10	1	0
LH	As	2013	3	66	3	0	0	0	3	18	0	1
LH	As	2013	4	73	3	0	0	0	3	24	0	1
LH	As	2013	5	62	3	0	0	0	3	27	8	2
LH	As	2013	6	50	3	0	0	0	3	20	0	2
LH	As	2013	7	36	4	0	0	0	4	55	0	7
LH	As	2013	8	51	4	0	0	0	4	8	0	0
LH	As	2013	9	57	3	0	0	0	3	41	0	0
LH	As	2013	10	29	4	0	0	0	4	19	1	2
LH	As	2013	11	41	3	0	0	0	3	12	1	1
LH	As	2013	12	54	3	0	0	0	3	20	0	0
LH	As	2013	13	77	2	0	0	0	2	23	0	2
LH	As	2013	14	64	2	0	0	0	2	15	0	3
LH	As	2013	15	58	2	0	0	0	2	16	0	0
LH	As	2013	16	64	2	0	1	0	1	14	0	2
LH	As	2013	17	58	5	0	0	0	5	6	1	0
LH	As	2013	18	51	3	0	0	0	3	22	2	3
LH	As	2013	19	43	4	0	0	0	4	23	0	0
LH	As	2013	20	50	6	0	0	0	6	16	2	0
LH	As	2013	21	60	5	0	0	0	5	26	2	2
LH	As	2013	22	108	2	0	0	0	2	15	0	1
LH	As	2013	23	47	5	0	0	1	4	37	0	0
LH	As	2013	24	48	5	0	0	0	5	24	1	4
LH	As	2013	25	42	5	0	0	0	5	91	0	2
LH	As	2013	26	42	5	0	1	0	4	16	0	2
LH	As	2013	27	76	4	0	0	0	4	32	0	2
LH	As	2013	28	53	4	0	0	0	4	19	1	2
LH	As	2013	29	80	2	0	0	0	2	52	0	0
LH	As	2013	30	66	2	0	0	0	2	36	2	2
DL	Ap	2013	1	55	7	3	0	3	1	9	0	2
DL	Ap	2013	2	21	25	19	0	6	0	8	1	3
DL	Ap	2013	3	43	24	17	1	2	4	3	0	1
DL	Ap	2013	4	30	26	14	4	6	2	6	0	1
DL	Ap	2013	5	25	15	11	2	0	2	0	0	0
DL	Ap	2013	6	16	31	28	1	2	0	5	1	3
DL	Ap	2013	7	23	35	27	4	0	4	16	1	6
DL	Ap	2013	8	34	19	11	2	4	2	3	0	1
DL	Ap	2013	9	31	28	24	2	1	1	4	0	2
DL	Ap	2013	10	24	34	21	1	11	1	3	0	0
DL	Ap	2013	11	20	19	15	0	4	0	5	0	3
DL	Ap	2013	12	22	30	22	4	3	1	33	6	9
DL	Ap	2013	13	24	33	26	6	0	1	7	1	2
DL	Ap	2013	14	30	23	13	1	7	2	11	2	4
DL	Ap	2013	15	37	16	9	0	5	2	12	0	6
DL	Ap	2013	16	37	15	13	1	1	0	NA	NA	NA
DL	Ap	2013	17	52	11	9	1	0	1	NA	NA	NA
DL	Ap	2013	18	45	10	6	1	2	1	NA	NA	NA
DL	Ap	2013	19	35	17	12	0	3	2	8	1	3
DL	Ap	2013	20	35	13	13	0	0	0	7	0	1
DL	Ap	2013	21	29	15	14	1	0	0	NA	NA	NA
DL	Ap	2013	22	25	14	8	4	2	0	2	0	0
DL	Ap	2013	23	18	35	27	5	1	2	7	4	2
DL	Ap	2013	24	31	55	45	2	4	4	32	6	9
DL	Ap	2013	25	16	42	35	4	2	1	13	0	8
DL	Ap	2013	26	24	50	49	0	0	1	3	1	0
DL	Ap	2013	27	33	29	19	2	5	3	13	0	1
DL	Ap	2013	28	42	13	6	1	2	4	3	0	1
DL	Ap	2013	29	44	10	6	2	1	1	4	0	4
DL	Ap	2013	30	43	16	11	0	3	2	2	0	1
FB	Al	2013	1	84	5	0	0	0	5	41	3	8
FB	Al	2013	2	72	5	0	0	0	5	NA	NA	NA
FB	Al	2013	3	82	7	0	0	1	6	16	1	4
FB	Al	2013	4	88	5	0	0	0	5	NA	NA	NA
FB	Al	2013	5	98	4	0	0	0	4	37	6	11
FB	Al	2013	6	101	1	0	0	0	1	33	3	10
FB	Al	2013	7	79	5	0	0	0	5	59	11	26
FB	Al	2013	8	80	6	0	0	0	6	29	1	7
FB	Al	2013	9	92	4	0	1	0	3	NA	NA	NA
FB	Al	2013	10	170	1	0	0	0	1	12	1	3
FB	Al	2013	11	81	2	0	0	0	2	NA	NA	NA
FB	Al	2013	12	93	5	0	0	0	5	22	3	6
FB	Al	2013	13	45	6	0	0	0	6	11	1	4
FB	Al	2013	14	44	9	0	2	0	7	NA	NA	NA
FB	Al	2013	15	61	18	0	2	1	15	NA	NA	NA
FB	Al	2013	16	120	5	0	0	0	5	3	0	1
FB	Al	2013	17	75	6	0	0	0	6	32	3	8
FB	Al	2013	18	97	1	0	0	0	1	34	0	12
FB	Al	2013	19	138	3	0	0	0	3	24	0	9
FB	Al	2013	20	132	1	0	0	0	1	29	3	8
FB	Al	2013	21	69	5	0	0	0	5	NA	NA	NA
FB	Al	2013	22	77	5	0	0	0	5	22	5	7
FB	Al	2013	23	38	3	1	0	0	2	NA	NA	NA
FB	Al	2013	24	105	3	1	0	0	2	30	1	14
FB	Al	2013	25	36	6	0	1	0	5	31	7	11
FB	Al	2013	26	99	8	0	0	1	7	7	2	5
FB	Al	2013	27	81	3	0	0	1	2	5	0	1
FB	Al	2013	28	77	3	0	0	0	3	6	0	3
FB	Al	2013	29	95	4	0	0	0	4	6	0	4
FB	Al	2013	30	135	2	0	0	0	2	9	1	1
IV	Ap	2013	1	18	6	1	1	1	3	4	0	2
IV	Ap	2013	2	33	12	2	5	0	5	0	0	0
IV	Ap	2013	3	49	7	0	6	0	1	2	0	0
IV	Ap	2013	4	22	14	1	8	1	3	6	0	3
IV	Ap	2013	5	38	7	1	3	1	2	5	0	3
IV	Ap	2013	6	23	12	3	6	1	2	4	1	1
IV	Ap	2013	7	31	6	1	1	1	3	5	0	4
IV	Ap	2013	8	33	10	1	3	3	3	1	0	1
IV	Ap	2013	9	55	8	2	3	0	3	1	0	1
IV	Ap	2013	10	51	10	0	8	0	2	3	1	2
IV	Ap	2013	11	39	12	1	9	0	2	9	1	3
IV	Ap	2013	12	18	10	6	1	0	3	0	0	0
IV	Ap	2013	13	55	2	0	0	1	1	1	0	1
IV	Ap	2013	14	44	13	3	6	0	4	2	0	0
IV	Ap	2013	15	73	19	4	9	0	6	2	0	0
IV	Ap	2013	16	30	11	0	8	0	3	3	0	2
IV	Ap	2013	17	60	7	0	4	0	3	1	0	0
IV	Ap	2013	18	44	13	3	8	0	2	2	0	2
IV	Ap	2013	19	41	14	3	6	0	5	1	0	0
IV	Ap	2013	20	45	8	1	5	0	2	4	0	2
IV	Ap	2013	21	24	14	1	9	0	4	2	0	1
IV	Ap	2013	22	46	15	7	5	1	2	9	0	5
IV	Ap	2013	23	31	14	6	4	2	2	0	0	0
IV	Ap	2013	24	35	10	2	5	0	3	2	0	1
IV	Ap	2013	25	32	15	2	10	0	3	1	0	0
IV	Ap	2013	26	43	20	4	11	1	4	3	1	2
IV	Ap	2013	27	36	5	3	1	0	1	1	0	1
IV	Ap	2013	28	41	9	5	3	0	1	0	0	0
IV	Ap	2013	29	85	7	0	3	1	3	14	2	3
IV	Ap	2013	30	37	10	6	2	0	2	0	0	0
LM	As	2013	1	51	6	0	0	0	6	13	0	1
LM	As	2013	2	35	6	0	1	0	5	11	1	2
LM	As	2013	3	55	5	0	1	0	4	31	1	3
LM	As	2013	4	50	5	0	1	0	4	23	0	0
LM	As	2013	5	46	8	0	1	0	7	3	0	1
LM	As	2013	6	44	4	0	1	0	3	57	3	6
LM	As	2013	7	34	5	0	0	0	5	17	1	1
LM	As	2013	8	50	4	0	0	0	4	16	1	4
LM	As	2013	9	66	3	0	1	0	2	18	4	1
LM	As	2013	10	56	3	0	0	0	3	NA	NA	NA
LM	As	2013	11	129	2	0	0	0	2	29	1	4
LM	As	2013	12	61	3	0	0	0	3	23	4	6
LM	As	2013	13	55	2	0	0	0	2	38	3	3
LM	As	2013	14	45	7	0	0	0	7	69	0	0
LM	As	2013	15	50	6	0	0	0	6	21	1	2
LM	As	2013	16	47	1	0	0	0	1	NA	NA	NA
LM	As	2013	17	38	5	0	1	0	4	12	0	1
LM	As	2013	18	44	3	0	1	0	2	23	1	3
LM	As	2013	19	32	4	0	0	0	4	NA	NA	NA
LM	As	2013	20	32	5	0	0	0	5	15	0	1
LM	As	2013	21	23	8	0	0	0	8	32	4	8
LM	As	2013	22	34	5	0	0	0	5	19	2	2
LM	As	2013	23	40	5	0	1	0	4	26	1	3
LM	As	2013	24	37	3	0	0	0	3	25	2	4
LM	As	2013	25	41	6	0	1	0	5	21	2	2
LM	As	2013	26	45	9	0	1	0	8	23	2	1
LM	As	2013	27	38	6	0	0	0	6	24	0	1
LM	As	2013	28	18	10	3	1	1	5	14	0	2
LM	As	2013	29	34	7	0	1	0	6	22	1	2
LM	As	2013	30	33	4	0	1	0	3	11	0	0
MP	Al	2013	1	86	4	1	1	0	2	14	0	3
MP	Al	2013	2	120	3	0	0	0	3	6	0	2
MP	Al	2013	3	130	5	0	1	0	4	27	3	10
MP	Al	2013	4	97	7	1	1	0	5	24	0	6
MP	Al	2013	5	133	3	0	0	0	3	16	0	8
MP	Al	2013	6	160	1	0	0	0	1	44	4	17
MP	Al	2013	7	88	3	0	3	0	0	30	2	3
MP	Al	2013	8	131	5	0	0	0	5	42	1	18
MP	Al	2013	9	113	3	0	1	0	2	90	4	25
MP	Al	2013	10	164	1	0	0	0	1	25	0	7
MP	Al	2013	11	91	6	0	3	0	3	18	0	9
MP	Al	2013	12	90	3	0	0	0	3	23	3	9
MP	Al	2013	13	80	8	1	2	0	5	23	2	7
MP	Al	2013	14	78	8	0	3	0	5	56	2	19
MP	Al	2013	15	83	7	1	0	0	6	16	1	10
MP	Al	2013	16	92	6	0	2	0	4	14	2	8
MP	Al	2013	17	91	6	1	1	0	4	20	0	5
MP	Al	2013	18	85	9	1	3	0	5	13	1	7
MP	Al	2013	19	89	8	1	4	0	3	14	0	9
MP	Al	2013	20	76	5	0	4	0	1	18	1	5
MP	Al	2013	21	95	7	0	2	0	5	30	2	6
MP	Al	2013	22	106	5	0	0	0	5	70	2	17
MP	Al	2013	23	75	3	0	1	0	2	10	0	2
MP	Al	2013	24	92	2	0	0	0	2	10	0	7
MP	Al	2013	25	144	3	0	0	0	3	65	1	24
MP	Al	2013	26	77	5	0	1	0	4	0	0	0
MP	Al	2013	27	155	1	0	0	0	1	31	6	9
MP	Al	2013	28	117	2	0	1	0	1	4	0	1
MP	Al	2013	29	158	2	0	1	0	1	32	3	10
MP	Al	2013	30	140	2	0	0	0	2	37	0	9
MR	As	2013	1	26	8	1	1	0	6	13	1	1
MR	As	2013	2	14	7	1	3	0	3	8	1	1
MR	As	2013	3	27	6	0	1	0	5	9	0	1
MR	As	2013	4	28	2	0	0	0	2	14	0	2
MR	As	2013	5	27	8	0	1	0	7	14	2	1
MR	As	2013	6	22	4	1	0	0	3	7	2	1
MR	As	2013	7	21	7	0	1	0	6	20	2	1
MR	As	2013	8	38	3	0	0	0	3	30	0	0
MR	As	2013	9	19	6	0	1	0	5	6	0	0
MR	As	2013	10	36	4	0	1	0	3	4	0	0
MR	As	2013	11	34	4	0	0	0	4	64	1	1
MR	As	2013	12	41	2	0	1	0	1	0	0	0
MR	As	2013	13	33	2	0	0	0	2	NA	NA	NA
MR	As	2013	14	38	3	0	1	0	2	9	0	0
MR	As	2013	15	28	1	0	0	0	1	15	1	0
MR	As	2013	16	57	1	0	0	0	1	2	0	2
MR	As	2013	17	45	1	0	0	0	1	13	0	1
MR	As	2013	18	21	5	0	2	0	3	32	0	0
MR	As	2013	19	35	5	0	1	0	4	39	6	5
MR	As	2013	20	20	5	0	3	0	2	14	0	0
MR	As	2013	21	14	3	0	2	0	1	8	1	1
MR	As	2013	22	24	8	0	2	0	6	20	5	1
MR	As	2013	23	23	4	0	2	0	2	2	0	0
MR	As	2013	24	23	2	0	1	0	1	0	0	0
MR	As	2013	25	20	3	0	1	0	2	10	2	1
MR	As	2013	26	28	3	0	0	0	3	8	0	0
MR	As	2013	27	40	3	0	0	0	3	7	0	0
MR	As	2013	28	24	4	0	3	0	1	0	0	0
MR	As	2013	29	37	1	0	1	0	0	1	0	1
MR	As	2013	30	30	5	0	0	0	5	6	0	0
PN	As	2013	1	19	19	0	4	1	14	20	1	2
PN	As	2013	2	18	20	0	9	0	11	13	0	3
PN	As	2013	3	23	19	0	6	0	13	24	3	3
PN	As	2013	4	21	23	0	8	0	15	28	2	1
PN	As	2013	5	27	15	0	2	0	13	0	0	0
PN	As	2013	6	20	24	0	2	0	22	3	0	2
PN	As	2013	7	17	23	0	6	0	17	12	1	2
PN	As	2013	8	19	21	0	7	0	14	20	2	2
PN	As	2013	9	22	27	0	9	0	18	24	5	4
PN	As	2013	10	20	24	0	6	0	18	23	9	1
PN	As	2013	11	22	43	0	9	0	0	20	1	2
PN	As	2013	12	17	24	1	5	0	18	3	0	2
PN	As	2013	13	18	35	1	7	0	27	8	1	2
PN	As	2013	14	28	29	1	8	0	20	22	2	2
PN	As	2013	15	20	26	2	7	0	19	12	2	2
PN	As	2013	16	28	26	1	4	0	21	14	3	4
PN	As	2013	17	28	8	0	2	0	6	20	4	4
PN	As	2013	18	34	6	0	1	0	5	0	0	0
PN	As	2013	19	35	8	0	4	0	4	8	1	0
PN	As	2013	20	40	6	0	2	0	4	24	1	3
PN	As	2013	21	52	6	0	2	0	4	3	1	0
PN	As	2013	22	57	6	0	0	0	6	14	0	5
PN	As	2013	23	41	6	0	2	0	4	15	0	0
PN	As	2013	24	37	6	0	0	0	6	19	1	0
PN	As	2013	25	58	6	0	0	0	6	25	3	1
PN	As	2013	26	38	6	0	3	0	3	52	3	3
PN	As	2013	27	44	8	0	2	0	6	34	1	3
PN	As	2013	28	19	32	0	5	0	27	26	0	2
PN	As	2013	29	18	37	0	4	0	33	NA	NA	NA
PN	As	2013	30	15	29	0	7	0	22	4	4	0
RD	Ap	2013	1	27	4	1	0	1	2	3	0	1
RD	Ap	2013	2	45	6	2	1	0	3	0	0	0
RD	Ap	2013	3	51	5	2	1	1	1	17	1	6
RD	Ap	2013	4	70	29	10	12	4	3	NA	NA	NA
RD	Ap	2013	5	15	38	22	14	0	2	1	0	0
RD	Ap	2013	6	37	24	12	8	3	1	3	0	0
RD	Ap	2013	7	29	13	8	4	0	1	0	0	0
RD	Ap	2013	8	52	15	7	6	1	1	0	0	0
RD	Ap	2013	9	35	6	5	1	0	0	0	0	0
RD	Ap	2013	10	54	15	8	7	0	0	0	0	0
RD	Ap	2013	11	39	14	8	5	0	1	0	0	0
RD	Ap	2013	12	29	24	14	7	2	1	0	0	0
RD	Ap	2013	13	32	19	6	6	2	5	2	0	1
RD	Ap	2013	14	33	10	4	5	0	1	NA	NA	NA
RD	Ap	2013	15	17	7	2	3	0	2	0	0	0
RD	Ap	2013	16	46	14	6	3	1	4	1	0	0
RD	Ap	2013	17	22	14	2	10	1	1	1	0	0
RD	Ap	2013	18	84	22	10	11	1	0	0	0	0
RD	Ap	2013	19	34	10	4	5	1	0	0	0	0
RD	Ap	2013	20	14	17	7	9	1	0	0	0	0
RD	Ap	2013	21	22	22	15	4	3	0	0	0	0
RD	Ap	2013	22	22	12	7	4	0	1	2	0	1
RD	Ap	2013	23	32	29	12	10	3	4	1	0	0
RD	Ap	2013	24	17	25	13	11	0	1	0	0	0
RD	Ap	2013	25	21	29	16	8	0	5	0	0	0
RD	Ap	2013	26	54	23	12	7	1	3	0	0	0
RD	Ap	2013	27	18	30	9	12	2	7	0	0	0
RD	Ap	2013	28	61	8	5	2	0	1	0	0	0
RD	Ap	2013	29	95	18	4	10	1	3	3	0	1
RD	Ap	2013	30	20	9	6	2	0	1	0	0	0
VV	Ap	2013	1	39	11	3	4	0	4	0	0	0
VV	Ap	2013	2	38	8	2	4	0	2	0	0	0
VV	Ap	2013	3	52	7	1	2	0	2	NA	NA	NA
VV	Ap	2013	4	40	14	5	8	0	1	0	0	0
VV	Ap	2013	5	48	19	6	3	1	9	NA	NA	NA
VV	Ap	2013	6	37	18	2	5	1	10	0	0	0
VV	Ap	2013	7	29	28	11	9	1	7	10	1	3
VV	Ap	2013	8	48	6	1	1	2	2	3	0	0
VV	Ap	2013	9	36	18	8	3	2	5	1	0	0
VV	Ap	2013	10	37	15	8	3	1	3	1	0	0
VV	Ap	2013	11	45	7	5	0	0	2	2	0	0
VV	Ap	2013	12	26	21	14	2	1	4	9	1	0
VV	Ap	2013	13	46	11	9	2	0	0	1	1	0
VV	Ap	2013	14	78	2	0	2	0	0	0	0	0
VV	Ap	2013	15	58	7	0	4	1	2	2	0	0
VV	Ap	2013	16	67	7	3	2	0	2	4	1	1
VV	Ap	2013	17	52	12	1	3	3	5	9	0	0
VV	Ap	2013	18	71	1	0	0	0	1	4	0	2
VV	Ap	2013	19	45	11	4	1	1	5	4	0	3
VV	Ap	2013	20	25	9	5	2	0	2	7	2	2
VV	Ap	2013	21	55	5	4	1	0	0	2	0	0
VV	Ap	2013	22	53	8	3	2	0	3	1	0	0
VV	Ap	2013	23	37	11	10	1	0	0	1	0	0
VV	Ap	2013	24	52	9	5	2	2	0	3	0	0
VV	Ap	2013	25	46	11	3	5	0	3	3	0	1
VV	Ap	2013	26	53	5	1	0	2	2	10	0	2
VV	Ap	2013	27	47	9	0	2	1	6	19	3	2
VV	Ap	2013	28	54	14	2	2	2	8	27	1	1
VV	Ap	2013	29	40	8	1	4	1	2	15	0	2
VV	Ap	2013	30	94	2	0	0	0	2	9	3	4
WR	Al	2013	1	76	4	1	2	0	1	1	0	0
WR	Al	2013	2	35	13	1	8	0	4	0	0	0
WR	Al	2013	3	30	9	1	5	0	3	0	0	0
WR	Al	2013	4	53	10	0	7	0	3	1	0	0
WR	Al	2013	5	164	2	0	1	0	1	1	0	1
WR	Al	2013	6	137	3	1	1	0	1	1	0	1
WR	Al	2013	7	141	3	0	0	0	3	17	2	13
WR	Al	2013	8	118	3	0	2	0	1	1	0	1
WR	Al	2013	9	77	5	0	1	0	4	2	2	0
WR	Al	2013	10	48	5	0	3	0	2	0	0	0
WR	Al	2013	11	78	8	0	6	0	2	2	0	1
WR	Al	2013	12	87	5	0	5	0	0	3	1	1
WR	Al	2013	13	94	3	0	1	0	2	10	3	6
WR	Al	2013	14	118	3	0	2	0	1	4	1	3
WR	Al	2013	15	256	1	0	1	0	0	3	1	1
WR	Al	2013	16	285	2	0	0	0	2	11	0	5
WR	Al	2013	17	165	2	0	0	0	2	0	0	0
WR	Al	2013	18	273	1	0	0	0	1	9	0	6
WR	Al	2013	19	226	2	0	1	0	1	2	0	2
WR	Al	2013	20	142	1	0	0	0	1	6	0	5
WR	Al	2013	21	238	1	0	0	0	1	2	0	1
WR	Al	2013	22	130	1	0	0	0	1	36	1	19
WR	Al	2013	23	136	2	0	0	0	2	8	0	8
WR	Al	2013	24	87	2	0	0	0	2	13	5	6
WR	Al	2013	25	241	1	0	0	0	1	19	0	12
WR	Al	2013	26	244	1	0	0	0	1	28	1	16
WR	Al	2013	27	318	1	0	0	0	1	37	3	20
WR	Al	2013	28	252	1	0	0	0	1	14	0	6
WR	Al	2013	29	171	1	0	0	0	1	8	0	7
WR	Al	2013	30	508	1	0	0	0	1	3	0	3

## Sheet:  DBH
Site	Species	Year	Sample	Tree	Diameter	Canopy
FB	Al	2013	1	1	55.2	Y
FB	Al	2013	1	2	90.1	Y
FB	Al	2013	1	3	106	Y
FB	Al	2013	1	4	136.5	N
FB	Al	2013	1	5	31	N
FB	Al	2013	2	1	67	Y
FB	Al	2013	2	2	101	Y
FB	Al	2013	2	3	50.01	N
FB	Al	2013	2	4	82	N
FB	Al	2013	2	5	59.8	N
FB	Al	2013	3	1	85	Y
FB	Al	2013	3	2	115	N
FB	Al	2013	3	3	73.1	N
FB	Al	2013	3	4	54	N
FB	Al	2013	4	1	71.1	Y
FB	Al	2013	4	2	95	Y
FB	Al	2013	4	3	103.7	N
FB	Al	2013	4	4	84.1	N
FB	Al	2013	4	5	85.2	N
FB	Al	2013	5	1	97.1	Y
FB	Al	2013	5	2	111	N
FB	Al	2013	5	3	78.1	N
FB	Al	2013	5	4	104.2	N
FB	Al	2013	6	1	101.2	Y
FB	Al	2013	7	1	117.2	Y
FB	Al	2013	7	2	104.8	Y
FB	Al	2013	7	3	15	N
FB	Al	2013	7	4	41.1	N
FB	Al	2013	7	5	117.5	N
FB	Al	2013	8	1	112	Y
FB	Al	2013	8	2	33.5	N
FB	Al	2013	8	3	115.2	N
FB	Al	2013	8	4	58.1	N
FB	Al	2013	9	1	21.9	Y
FB	Al	2013	9	2	112.1	Y
FB	Al	2013	9	3	148	Y
FB	Al	2013	9	4	86	Y
FB	Al	2013	10	1	170.4	Y
FB	Al	2013	11	1	20.2	Y
FB	Al	2013	11	2	140.8	Y
FB	Al	2013	12	1	121.5	Y
FB	Al	2013	12	2	45.1	N
FB	Al	2013	12	3	81	N
FB	Al	2013	12	4	124.8	N
FB	Al	2013	13	1	121.2	Y
FB	Al	2013	13	2	32.9	Y
FB	Al	2013	13	3	27.5	N
FB	Al	2013	13	4	12.9	N
FB	Al	2013	13	5	30.5	N
FB	Al	2013	14	1	35.8	Y
FB	Al	2013	14	2	45	Y
FB	Al	2013	14	3	56.1	Y
FB	Al	2013	14	4	38.3	N
FB	Al	2013	14	5	39	N
FB	Al	2013	14	6	48	N
FB	Al	2013	15	1	32.4	Y
FB	Al	2013	15	2	108.1	Y
FB	Al	2013	15	3	114	Y
FB	Al	2013	15	4	24.5	N
FB	Al	2013	15	5	41.2	N
FB	Al	2013	15	6	44.9	N
FB	Al	2013	16	1	202.8	Y
FB	Al	2013	16	2	110	N
FB	Al	2013	16	3	116.4	N
FB	Al	2013	16	4	51.6	N
FB	Al	2013	17	1	36.9	Y
FB	Al	2013	17	2	108	Y
FB	Al	2013	17	3	36.1	N
FB	Al	2013	17	4	92	N
FB	Al	2013	17	5	101.1	N
FB	Al	2013	18	1	97.2	Y
FB	Al	2013	19	1	153	Y
FB	Al	2013	19	2	153.1	N
FB	Al	2013	19	3	108	N
FB	Al	2013	20	1	132	Y
FB	Al	2013	21	1	74	Y
FB	Al	2013	21	2	65	N
FB	Al	2013	21	3	82.1	N
FB	Al	2013	21	4	56.6	N
FB	Al	2013	22	1	50	Y
FB	Al	2013	22	2	108	Y
FB	Al	2013	22	3	61.5	N
FB	Al	2013	22	4	96.8	N
FB	Al	2013	22	5	68.2	N
FB	Al	2013	23	1	37.1	Y
FB	Al	2013	23	2	27	Y
FB	Al	2013	23	3	49.9	Y
FB	Al	2013	24	1	150.1	Y
FB	Al	2013	24	2	127.8	Y
FB	Al	2013	24	3	35.5	N
FB	Al	2013	25	1	50.5	Y
FB	Al	2013	25	2	13	N
FB	Al	2013	25	3	41	N
FB	Al	2013	25	4	41.1	N
FB	Al	2013	26	1	148	Y
FB	Al	2013	26	2	77.1	N
FB	Al	2013	26	3	31	N
FB	Al	2013	26	4	140	N
FB	Al	2013	27	1	120.2	Y
FB	Al	2013	27	2	56.9	N
FB	Al	2013	27	3	67	N
FB	Al	2013	28	1	68.3	Y
FB	Al	2013	28	2	74.1	Y
FB	Al	2013	28	3	88	N
FB	Al	2013	29	1	74.1	Y
FB	Al	2013	29	2	94.9	N
FB	Al	2013	29	3	86.9	N
FB	Al	2013	29	4	124.8	N
FB	Al	2013	30	1	135.3	Y
FB	Al	2013	30	2	134.4	N
MP	Al	2013	1	1	148.5	Y
MP	Al	2013	1	2	24.2	N
MP	Al	2013	1	3	60.8	N
MP	Al	2013	1	4	110	N
MP	Al	2013	2	1	106.1	Y
MP	Al	2013	2	2	150	N
MP	Al	2013	2	3	103.8	N
MP	Al	2013	3	1	148.9	Y
MP	Al	2013	3	2	88.9	N
MP	Al	2013	3	3	53	N
MP	Al	2013	3	4	230.9	N
MP	Al	2013	4	1	129	Y
MP	Al	2013	4	2	40.4	Y
MP	Al	2013	4	3	82.4	N
MP	Al	2013	4	4	96.8	N
MP	Al	2013	4	5	135.9	N
MP	Al	2013	5	1	215	Y
MP	Al	2013	5	2	98.3	N
MP	Al	2013	5	3	85.9	N
MP	Al	2013	6	1	160	Y
MP	Al	2013	7	1	137	Y
MP	Al	2013	7	2	34.9	N
MP	Al	2013	7	3	91	N
MP	Al	2013	8	1	156.9	Y
MP	Al	2013	8	2	113.2	Y
MP	Al	2013	8	3	94	N
MP	Al	2013	8	4	178	N
MP	Al	2013	8	5	112	N
MP	Al	2013	9	1	156	Y
MP	Al	2013	9	2	67.8	Y
MP	Al	2013	9	3	115	N
MP	Al	2013	10	1	164.3	Y
MP	Al	2013	11	1	166	Y
MP	Al	2013	11	2	56.2	N
MP	Al	2013	11	3	109.7	N
MP	Al	2013	11	4	33	N
MP	Al	2013	12	1	49.5	Y
MP	Al	2013	12	2	171.2	Y
MP	Al	2013	12	3	49.7	N
MP	Al	2013	13	1	59.2	Y
MP	Al	2013	13	2	42.4	Y
MP	Al	2013	13	3	227	Y
MP	Al	2013	13	4	59.2	N
MP	Al	2013	13	5	33.1	N
MP	Al	2013	13	6	60.7	N
MP	Al	2013	14	1	134.7	Y
MP	Al	2013	14	2	59.2	N
MP	Al	2013	14	3	41	N
MP	Al	2013	14	4	77	N
MP	Al	2013	15	1	67.7	Y
MP	Al	2013	15	2	156.8	Y
MP	Al	2013	15	3	92	N
MP	Al	2013	15	4	54.9	N
MP	Al	2013	15	5	41	N
MP	Al	2013	16	1	91.8	Y
MP	Al	2013	16	2	57.5	Y
MP	Al	2013	16	3	160.9	N
MP	Al	2013	16	4	91.5	N
MP	Al	2013	16	5	60.2	N
MP	Al	2013	17	1	58.1	Y
MP	Al	2013	17	2	160.2	Y
MP	Al	2013	17	3	80.2	N
MP	Al	2013	17	4	63.6	N
MP	Al	2013	17	5	93	N
MP	Al	2013	18	1	132.3	Y
MP	Al	2013	18	2	93.5	N
MP	Al	2013	18	3	82.1	N
MP	Al	2013	18	4	33.1	N
MP	Al	2013	19	1	134.1	Y
MP	Al	2013	19	2	81.5	Y
MP	Al	2013	19	3	133	Y
MP	Al	2013	19	4	59.9	N
MP	Al	2013	19	5	45.1	N
MP	Al	2013	19	6	78.8	N
MP	Al	2013	20	1	102.6	Y
MP	Al	2013	20	2	58	Y
MP	Al	2013	20	3	48.1	Y
MP	Al	2013	20	4	142	N
MP	Al	2013	20	5	26.8	N
MP	Al	2013	21	1	154.5	Y
MP	Al	2013	21	2	61	Y
MP	Al	2013	21	3	144.8	Y
MP	Al	2013	21	4	51.5	N
MP	Al	2013	21	5	102	N
MP	Al	2013	21	6	56.2	N
MP	Al	2013	22	1	173	Y
MP	Al	2013	22	2	66.5	N
MP	Al	2013	22	3	143	N
MP	Al	2013	22	4	40.2	N
MP	Al	2013	23	1	57	Y
MP	Al	2013	23	2	70	N
MP	Al	2013	23	3	97.3	N
MP	Al	2013	24	1	81.1	Y
MP	Al	2013	24	2	102.2	Y
MP	Al	2013	25	1	171.2	Y
MP	Al	2013	25	2	153	Y
MP	Al	2013	25	3	108.5	N
MP	Al	2013	26	1	58.7	Y
MP	Al	2013	26	2	118	N
MP	Al	2013	26	3	40.8	N
MP	Al	2013	26	4	90	N
MP	Al	2013	27	1	155.3	Y
MP	Al	2013	28	1	133.2	Y
MP	Al	2013	28	2	100	Y
MP	Al	2013	29	1	160.7	Y
MP	Al	2013	29	2	155	N
MP	Al	2013	30	1	112	Y
MP	Al	2013	30	2	167.5	Y
AV	Al	2013	1	1	147	Y
AV	Al	2013	2	1	53.5	Y
AV	Al	2013	2	2	37.4	N
AV	Al	2013	3	1	90.1	Y
AV	Al	2013	3	2	66	N
AV	Al	2013	3	3	15	N
AV	Al	2013	3	4	22	N
AV	Al	2013	4	1	95.7	Y
AV	Al	2013	4	2	122.1	Y
AV	Al	2013	4	3	8.1	N
AV	Al	2013	4	4	30.2	N
AV	Al	2013	4	5	10.2	N
AV	Al	2013	5	1	73.7	Y
AV	Al	2013	5	2	94	N
AV	Al	2013	6	1	151.45	Y
AV	Al	2013	6	2	3.9	N
AV	Al	2013	7	1	64.2	Y
AV	Al	2013	7	2	87	Y
AV	Al	2013	7	3	13	N
AV	Al	2013	7	4	12.8	N
AV	Al	2013	8	1	154.3	Y
AV	Al	2013	9	1	41.2	Y
AV	Al	2013	9	2	150	Y
AV	Al	2013	9	3	173	Y
AV	Al	2013	10	1	61.05	Y
AV	Al	2013	10	2	51	N
AV	Al	2013	10	3	22.3	N
AV	Al	2013	11	1	39.9	Y
AV	Al	2013	11	2	35.8	Y
AV	Al	2013	11	3	36.55	Y
AV	Al	2013	12	1	41.4	Y
AV	Al	2013	12	2	55.3	Y
AV	Al	2013	12	3	4	N
AV	Al	2013	12	4	2.9	N
AV	Al	2013	12	5	2.1	N
AV	Al	2013	13	1	116.5	Y
AV	Al	2013	14	1	137	Y
AV	Al	2013	14	2	53	N
AV	Al	2013	14	3	48.9	N
AV	Al	2013	15	1	146.2	Y
AV	Al	2013	15	2	73	N
AV	Al	2013	15	3	72	N
AV	Al	2013	15	4	36.5	N
AV	Al	2013	16	1	102.4	Y
AV	Al	2013	16	2	122	Y
AV	Al	2013	16	3	101.2	N
AV	Al	2013	16	4	39.2	N
AV	Al	2013	16	5	85.7	N
AV	Al	2013	17	1	240	Y
AV	Al	2013	17	2	28.5	Y
AV	Al	2013	17	3	28.1	N
AV	Al	2013	17	4	42.1	N
AV	Al	2013	17	5	28.1	N
AV	Al	2013	18	1	218.3	Y
AV	Al	2013	18	2	82	N
AV	Al	2013	18	3	31.9	N
AV	Al	2013	19	1	188.7	Y
AV	Al	2013	19	2	79	N
AV	Al	2013	19	3	71	N
AV	Al	2013	20	1	48	Y
AV	Al	2013	20	2	149	Y
AV	Al	2013	20	3	32.8	N
AV	Al	2013	20	4	85	N
AV	Al	2013	20	5	43.1	N
AV	Al	2013	21	1	35.1	Y
AV	Al	2013	21	2	79	Y
AV	Al	2013	21	3	81	N
AV	Al	2013	21	4	90	N
AV	Al	2013	21	5	35.6	N
AV	Al	2013	22	1	79.1	Y
AV	Al	2013	22	2	16	Y
AV	Al	2013	22	3	116.1	N
AV	Al	2013	22	4	53.4	N
AV	Al	2013	22	5	80.5	N
AV	Al	2013	23	1	147	Y
AV	Al	2013	23	2	28.5	N
AV	Al	2013	23	3	54.5	N
AV	Al	2013	23	4	35	N
AV	Al	2013	24	1	144.2	Y
AV	Al	2013	25	1	159.7	Y
AV	Al	2013	26	1	102.5	Y
AV	Al	2013	26	2	55.7	N
AV	Al	2013	26	3	43.8	N
AV	Al	2013	27	1	85	Y
AV	Al	2013	27	2	81.1	Y
AV	Al	2013	27	3	45.1	N
AV	Al	2013	28	1	15	Y
AV	Al	2013	28	2	24	Y
AV	Al	2013	28	3	230	Y
AV	Al	2013	29	1	15.2	Y
AV	Al	2013	29	2	244	Y
AV	Al	2013	29	3	13	N
AV	Al	2013	29	4	7	N
AV	Al	2013	30	1	2	Y
AV	Al	2013	30	2	12	Y
AV	Al	2013	30	3	16.2	Y
AV	Al	2013	30	4	14.7	N
AV	Al	2013	30	5	11	N
WR	Al	2013	1	1	262.1	Y
WR	Al	2013	1	2	20	N
WR	Al	2013	1	3	12	N
WR	Al	2013	1	4	7.9	N
WR	Al	2013	2	1	42.3	Y
WR	Al	2013	2	2	71.1	Y
WR	Al	2013	2	3	35.1	N
WR	Al	2013	2	4	12.1	N
WR	Al	2013	2	5	13.1	N
WR	Al	2013	3	1	19	Y
WR	Al	2013	3	2	35.7	Y
WR	Al	2013	3	3	33.1	N
WR	Al	2013	3	4	19.3	N
WR	Al	2013	3	5	44.5	N
WR	Al	2013	4	1	49.5	Y
WR	Al	2013	4	2	63	Y
WR	Al	2013	4	3	143	Y
WR	Al	2013	4	4	24.3	N
WR	Al	2013	4	5	21.2	N
WR	Al	2013	4	6	14.2	N
WR	Al	2013	5	1	320	Y
WR	Al	2013	5	2	7.1	N
WR	Al	2013	6	1	219.8	Y
WR	Al	2013	6	2	3.9	N
WR	Al	2013	6	3	188	N
WR	Al	2013	7	1	73	Y
WR	Al	2013	7	2	263.9	N
WR	Al	2013	7	3	86.1	N
WR	Al	2013	8	1	132	Y
WR	Al	2013	8	2	45.4	N
WR	Al	2013	8	3	176.1	N
WR	Al	2013	9	1	33.5	Y
WR	Al	2013	9	2	83	Y
WR	Al	2013	9	3	77.9	N
WR	Al	2013	9	4	101.1	N
WR	Al	2013	9	5	91.3	N
WR	Al	2013	10	1	76.6	Y
WR	Al	2013	10	2	53.2	N
WR	Al	2013	10	3	34.1	N
WR	Al	2013	10	4	28.6	N
WR	Al	2013	11	1	78.2	Y
WR	Al	2013	11	2	63.9	Y
WR	Al	2013	11	3	44.8	N
WR	Al	2013	11	4	66.1	N
WR	Al	2013	11	5	138.2	N
WR	Al	2013	12	1	41.3	Y
WR	Al	2013	12	2	148	Y
WR	Al	2013	12	3	180.3	N
WR	Al	2013	12	4	23.6	N
WR	Al	2013	12	5	40.2	N
WR	Al	2013	13	1	134.1	Y
WR	Al	2013	13	2	89.9	N
WR	Al	2013	13	3	57.3	N
WR	Al	2013	14	1	157	Y
WR	Al	2013	14	2	156.1	Y
WR	Al	2013	14	3	42.2	N
WR	Al	2013	15	1	256.4	Y
WR	Al	2013	16	1	265	Y
WR	Al	2013	16	2	305.6	N
WR	Al	2013	17	1	77.2	Y
WR	Al	2013	17	2	251.85	N
WR	Al	2013	18	1	273.4	Y
WR	Al	2013	19	1	182.6	Y
WR	Al	2013	19	2	269	N
WR	Al	2013	20	1	141.9	Y
WR	Al	2013	21	1	238	Y
WR	Al	2013	22	1	130.3	Y
WR	Al	2013	23	1	86.7	Y
WR	Al	2013	23	2	184.5	N
WR	Al	2013	24	1	161.1	Y
WR	Al	2013	24	2	12	N
WR	Al	2013	25	1	241	Y
WR	Al	2013	26	1	243.7	Y
WR	Al	2013	27	1	318	Y
WR	Al	2013	28	1	252.1	Y
WR	Al	2013	29	1	171	Y
WR	Al	2013	30	1	508.1	Y
VV	Ap	2013	1	1	60.4	Y
VV	Ap	2013	1	2	45.6	N
VV	Ap	2013	1	3	22.3	N
VV	Ap	2013	1	4	26.2	N
VV	Ap	2013	2	1	59.4	Y
VV	Ap	2013	2	2	21.9	N
VV	Ap	2013	2	3	37.2	N
VV	Ap	2013	2	4	33.3	N
VV	Ap	2013	3	1	49.9	Y
VV	Ap	2013	3	2	65.1	N
VV	Ap	2013	3	3	45.2	N
VV	Ap	2013	3	4	46.2	N
VV	Ap	2013	4	1	70.1	Y
VV	Ap	2013	4	2	21.1	Y
VV	Ap	2013	4	3	47.4	N
VV	Ap	2013	4	4	39.1	N
VV	Ap	2013	4	5	24.4	N
VV	Ap	2013	5	1	79	Y
VV	Ap	2013	5	2	23	Y
VV	Ap	2013	5	3	36	N
VV	Ap	2013	5	4	77.7	N
VV	Ap	2013	5	5	24.2	N
VV	Ap	2013	6	1	46.4	Y
VV	Ap	2013	6	2	13.7	N
VV	Ap	2013	6	3	56	N
VV	Ap	2013	6	4	33.1	N
VV	Ap	2013	7	1	56.2	Y
VV	Ap	2013	7	2	27.7	Y
VV	Ap	2013	7	3	25.1	N
VV	Ap	2013	7	4	10.1	N
VV	Ap	2013	7	5	24.8	N
VV	Ap	2013	8	1	68.7	Y
VV	Ap	2013	8	2	56.4	Y
VV	Ap	2013	8	3	32.1	N
VV	Ap	2013	8	4	41.2	N
VV	Ap	2013	8	5	40.6	N
VV	Ap	2013	9	1	45.8	Y
VV	Ap	2013	9	2	45.3	N
VV	Ap	2013	9	3	38.1	N
VV	Ap	2013	9	4	15	N
VV	Ap	2013	10	1	17.2	Y
VV	Ap	2013	10	2	47.6	Y
VV	Ap	2013	10	3	23.4	N
VV	Ap	2013	10	4	49.5	N
VV	Ap	2013	10	5	47.1	N
VV	Ap	2013	11	1	109.5	Y
VV	Ap	2013	11	2	38.6	Y
VV	Ap	2013	11	3	25.6	N
VV	Ap	2013	11	4	24.7	N
VV	Ap	2013	11	5	27.3	N
VV	Ap	2013	12	1	31.8	Y
VV	Ap	2013	12	2	28.2	Y
VV	Ap	2013	12	3	25.4	N
VV	Ap	2013	12	4	14.3	N
VV	Ap	2013	12	5	28.2	N
VV	Ap	2013	13	1	45.4	Y
VV	Ap	2013	13	2	57.1	Y
VV	Ap	2013	13	3	47.9	N
VV	Ap	2013	13	4	21.3	N
VV	Ap	2013	13	5	57.4	N
VV	Ap	2013	14	1	100.5	Y
VV	Ap	2013	14	2	55.4	N
VV	Ap	2013	15	1	23.7	Y
VV	Ap	2013	15	2	67	Y
VV	Ap	2013	15	3	79.1	N
VV	Ap	2013	15	4	69.3	N
VV	Ap	2013	15	5	51	N
VV	Ap	2013	16	1	57.1	Y
VV	Ap	2013	16	2	34.1	Y
VV	Ap	2013	16	3	73.1	N
VV	Ap	2013	16	4	119.4	N
VV	Ap	2013	16	5	51	N
VV	Ap	2013	17	1	47.9	Y
VV	Ap	2013	17	2	63.5	Y
VV	Ap	2013	17	3	22	N
VV	Ap	2013	17	4	53.4	N
VV	Ap	2013	17	5	71.1	N
VV	Ap	2013	18	1	70.9	Y
VV	Ap	2013	19	1	47.9	Y
VV	Ap	2013	19	2	82	N
VV	Ap	2013	19	3	16.2	N
VV	Ap	2013	19	4	35.6	N
VV	Ap	2013	20	1	22	Y
VV	Ap	2013	20	2	20	N
VV	Ap	2013	20	3	20.5	N
VV	Ap	2013	20	4	36.1	N
VV	Ap	2013	21	1	104	Y
VV	Ap	2013	21	2	26.1	N
VV	Ap	2013	21	3	36.2	N
VV	Ap	2013	21	4	54.1	N
VV	Ap	2013	22	1	38.3	Y
VV	Ap	2013	22	2	48.5	N
VV	Ap	2013	22	3	77	N
VV	Ap	2013	22	4	48.4	N
VV	Ap	2013	23	1	38	Y
VV	Ap	2013	23	2	42.2	N
VV	Ap	2013	23	3	31	N
VV	Ap	2013	23	4	35.8	N
VV	Ap	2013	24	1	103.5	Y
VV	Ap	2013	24	2	22.2	N
VV	Ap	2013	24	3	28.8	N
VV	Ap	2013	25	1	23.6	Y
VV	Ap	2013	25	2	43	N
VV	Ap	2013	25	3	94.2	N
VV	Ap	2013	25	4	21	N
VV	Ap	2013	26	1	109.5	Y
VV	Ap	2013	26	2	23.7	N
VV	Ap	2013	26	3	49.5	N
VV	Ap	2013	26	4	29.1	N
VV	Ap	2013	27	1	23.7	Y
VV	Ap	2013	27	2	89.8	Y
VV	Ap	2013	27	3	32.2	N
VV	Ap	2013	27	4	57.2	N
VV	Ap	2013	27	5	30.3	N
VV	Ap	2013	28	1	61	Y
VV	Ap	2013	28	2	69.3	N
VV	Ap	2013	28	3	54.8	N
VV	Ap	2013	28	4	31	N
VV	Ap	2013	29	1	40.1	Y
VV	Ap	2013	29	2	37.2	Y
VV	Ap	2013	29	3	31.1	N
VV	Ap	2013	29	4	66.9	N
VV	Ap	2013	29	5	23.8	N
VV	Ap	2013	30	1	108.1	Y
VV	Ap	2013	30	2	80.1	N
DL	Ap	2013	1	1	46	Y
DL	Ap	2013	1	2	61.8	Y
DL	Ap	2013	1	3	25.4	N
DL	Ap	2013	1	4	53.3	N
DL	Ap	2013	1	5	87	N
DL	Ap	2013	2	1	25.1	Y
DL	Ap	2013	2	2	28.3	Y
DL	Ap	2013	2	3	16.2	N
DL	Ap	2013	2	4	12.6	N
DL	Ap	2013	2	5	22.9	N
DL	Ap	2013	3	1	47	Y
DL	Ap	2013	3	2	70	N
DL	Ap	2013	3	3	7.9	N
DL	Ap	2013	3	4	45.8	N
DL	Ap	2013	4	1	18.4	Y
DL	Ap	2013	4	2	24.2	Y
DL	Ap	2013	4	3	28	Y
DL	Ap	2013	4	4	22	N
DL	Ap	2013	4	5	37.3	N
DL	Ap	2013	4	6	48.2	N
DL	Ap	2013	5	1	40.5	Y
DL	Ap	2013	5	2	19.8	N
DL	Ap	2013	5	3	17	N
DL	Ap	2013	5	4	24.2	N
DL	Ap	2013	6	1	23.2	Y
DL	Ap	2013	6	2	17.3	Y
DL	Ap	2013	6	3	8.7	N
DL	Ap	2013	6	4	17.4	N
DL	Ap	2013	6	5	11.8	N
DL	Ap	2013	7	1	18.1	Y
DL	Ap	2013	7	2	52.2	Y
DL	Ap	2013	7	3	28.1	N
DL	Ap	2013	7	4	11.2	N
DL	Ap	2013	7	5	6.8	N
DL	Ap	2013	8	1	17.6	Y
DL	Ap	2013	8	2	33.1	Y
DL	Ap	2013	8	3	45	Y
DL	Ap	2013	8	4	59.2	N
DL	Ap	2013	8	5	30.2	N
DL	Ap	2013	8	6	17.1	N
DL	Ap	2013	9	1	51	Y
DL	Ap	2013	9	2	11.1	N
DL	Ap	2013	9	3	35.2	N
DL	Ap	2013	9	4	26.6	N
DL	Ap	2013	10	1	27.9	Y
DL	Ap	2013	10	2	10.2	N
DL	Ap	2013	10	3	14.3	N
DL	Ap	2013	10	4	43.2	N
DL	Ap	2013	11	1	40.1	Y
DL	Ap	2013	11	2	18.3	Y
DL	Ap	2013	11	3	12.5	Y
DL	Ap	2013	11	4	12.8	N
DL	Ap	2013	11	5	21	N
DL	Ap	2013	11	6	14.7	N
DL	Ap	2013	12	1	22.9	Y
DL	Ap	2013	12	2	21	Y
DL	Ap	2013	12	3	9.1	N
DL	Ap	2013	12	4	23.2	N
DL	Ap	2013	12	5	11	N
DL	Ap	2013	13	1	39.6	Y
DL	Ap	2013	13	2	38.2	Y
DL	Ap	2013	13	3	6.6	N
DL	Ap	2013	13	4	11.5	N
DL	Ap	2013	13	5	25.8	N
DL	Ap	2013	14	1	29	Y
DL	Ap	2013	14	2	22.3	Y
DL	Ap	2013	14	3	41.2	N
DL	Ap	2013	14	4	27.3	N
DL	Ap	2013	14	5	27.8	N
DL	Ap	2013	15	1	37.1	Y
DL	Ap	2013	15	2	19	N
DL	Ap	2013	15	3	32	N
DL	Ap	2013	15	4	58.4	N
DL	Ap	2013	16	1	28.2	Y
DL	Ap	2013	16	2	28.2	N
DL	Ap	2013	16	3	25	N
DL	Ap	2013	16	4	68.1	N
DL	Ap	2013	17	1	49.3	Y
DL	Ap	2013	17	2	57	N
DL	Ap	2013	17	3	56.3	N
DL	Ap	2013	17	4	44.2	N
DL	Ap	2013	18	1	61.2	Y
DL	Ap	2013	18	2	36.6	N
DL	Ap	2013	18	3	37.3	N
DL	Ap	2013	18	4	43.4	N
DL	Ap	2013	19	1	47	Y
DL	Ap	2013	19	2	28.2	Y
DL	Ap	2013	19	3	31	N
DL	Ap	2013	19	4	40	N
DL	Ap	2013	19	5	28.6	N
DL	Ap	2013	20	1	54.1	Y
DL	Ap	2013	20	2	50.1	N
DL	Ap	2013	20	3	18.9	N
DL	Ap	2013	20	4	18.4	N
DL	Ap	2013	21	1	42.4	Y
DL	Ap	2013	21	2	35.5	N
DL	Ap	2013	21	3	27	N
DL	Ap	2013	21	4	10.2	N
DL	Ap	2013	22	1	25.2	Y
DL	Ap	2013	22	2	29.1	N
DL	Ap	2013	22	3	33.3	N
DL	Ap	2013	22	4	12.2	N
DL	Ap	2013	23	1	32.5	Y
DL	Ap	2013	23	2	18.6	Y
DL	Ap	2013	23	3	9.5	N
DL	Ap	2013	23	4	14.2	N
DL	Ap	2013	23	5	17	N
DL	Ap	2013	24	1	9	Y
DL	Ap	2013	24	2	4	Y
DL	Ap	2013	24	3	7.6	N
DL	Ap	2013	24	4	4.5	N
DL	Ap	2013	24	5	10.7	N
DL	Ap	2013	25	1	13.2	Y
DL	Ap	2013	25	2	33.1	Y
DL	Ap	2013	25	3	13.2	N
DL	Ap	2013	25	4	13	N
DL	Ap	2013	25	5	7.8	N
DL	Ap	2013	26	1	7	Y
DL	Ap	2013	26	2	3.2	Y
DL	Ap	2013	26	3	5.2	Y
DL	Ap	2013	26	4	118	Y
DL	Ap	2013	26	5	14.5	N
DL	Ap	2013	26	6	11.2	N
DL	Ap	2013	26	7	9.5	N
DL	Ap	2013	27	1	46	Y
DL	Ap	2013	27	2	28.1	Y
DL	Ap	2013	27	3	38.3	Y
DL	Ap	2013	27	4	30	N
DL	Ap	2013	27	5	15.5	N
DL	Ap	2013	27	6	37.6	N
DL	Ap	2013	28	1	28.1	Y
DL	Ap	2013	28	2	105.9	Y
DL	Ap	2013	28	3	32.1	N
DL	Ap	2013	28	4	16.6	N
DL	Ap	2013	28	5	28	N
DL	Ap	2013	29	1	23.6	Y
DL	Ap	2013	29	2	50.1	N
DL	Ap	2013	29	3	75.5	N
DL	Ap	2013	29	4	27.2	N
DL	Ap	2013	30	1	40.8	Y
DL	Ap	2013	30	2	40.1	Y
DL	Ap	2013	30	3	67.6	N
DL	Ap	2013	30	4	23.3	N
DL	Ap	2013	30	5	41.5	N
RD	Ap	2013	1	1	39.5	Y
RD	Ap	2013	1	2	20.3	N
RD	Ap	2013	1	3	28.2	N
RD	Ap	2013	1	4	17.9	N
RD	Ap	2013	2	1	77	Y
RD	Ap	2013	2	2	21	N
RD	Ap	2013	2	3	63.7	N
RD	Ap	2013	2	4	16.9	N
RD	Ap	2013	3	1	93.2	Y
RD	Ap	2013	3	2	26.2	N
RD	Ap	2013	3	3	25.6	N
RD	Ap	2013	3	4	57.2	N
RD	Ap	2013	4	1	136.3	Y
RD	Ap	2013	4	2	9.6	N
RD	Ap	2013	4	3	47.3	N
RD	Ap	2013	4	4	88	N
RD	Ap	2013	5	1	19.1	Y
RD	Ap	2013	5	2	10.8	Y
RD	Ap	2013	5	3	9	Y
RD	Ap	2013	5	4	25.7	N
RD	Ap	2013	5	5	11.9	N
RD	Ap	2013	5	6	11.7	N
RD	Ap	2013	6	1	34.2	Y
RD	Ap	2013	6	2	90	Y
RD	Ap	2013	6	3	7.9	N
RD	Ap	2013	6	4	36.5	N
RD	Ap	2013	6	5	15.7	N
RD	Ap	2013	7	1	39.9	Y
RD	Ap	2013	7	2	19.9	N
RD	Ap	2013	7	3	31.6	N
RD	Ap	2013	7	4	23	N
RD	Ap	2013	8	1	93	Y
RD	Ap	2013	8	2	19.3	N
RD	Ap	2013	8	3	75	N
RD	Ap	2013	8	4	19.7	N
RD	Ap	2013	9	1	20.2	Y
RD	Ap	2013	9	2	61.1	Y
RD	Ap	2013	9	3	60.1	N
RD	Ap	2013	9	4	9.2	N
RD	Ap	2013	9	5	24.1	N
RD	Ap	2013	10	1	112	Y
RD	Ap	2013	10	2	27.1	N
RD	Ap	2013	10	3	16.9	N
RD	Ap	2013	10	4	58	N
RD	Ap	2013	11	1	98.2	Y
RD	Ap	2013	11	2	17.8	N
RD	Ap	2013	11	3	28.1	N
RD	Ap	2013	11	4	11.8	N
RD	Ap	2013	12	1	45.7	Y
RD	Ap	2013	12	2	39.8	Y
RD	Ap	2013	12	3	15.3	N
RD	Ap	2013	12	4	12.2	N
RD	Ap	2013	12	5	30.1	N
RD	Ap	2013	13	1	26.2	Y
RD	Ap	2013	13	2	25.2	N
RD	Ap	2013	13	3	60.9	N
RD	Ap	2013	13	4	15	N
RD	Ap	2013	14	1	42.5	Y
RD	Ap	2013	14	2	52.4	N
RD	Ap	2013	14	3	19.8	N
RD	Ap	2013	14	4	16.2	N
RD	Ap	2013	15	1	34.9	Y
RD	Ap	2013	15	2	14.2	N
RD	Ap	2013	15	3	8.5	N
RD	Ap	2013	15	4	11.2	N
RD	Ap	2013	16	1	104.1	Y
RD	Ap	2013	16	2	56	N
RD	Ap	2013	16	3	14.8	N
RD	Ap	2013	16	4	8.8	N
RD	Ap	2013	17	1	30.4	Y
RD	Ap	2013	17	2	19.6	Y
RD	Ap	2013	17	3	33.2	N
RD	Ap	2013	17	4	16.9	N
RD	Ap	2013	17	5	11.8	N
RD	Ap	2013	18	1	13.2	Y
RD	Ap	2013	18	2	360.6	Y
RD	Ap	2013	18	3	10.5	N
RD	Ap	2013	18	4	21.1	N
RD	Ap	2013	18	5	13.7	N
RD	Ap	2013	19	1	86.1	Y
RD	Ap	2013	19	2	20.3	N
RD	Ap	2013	19	3	15.8	N
RD	Ap	2013	19	4	12.9	N
RD	Ap	2013	20	1	22	Y
RD	Ap	2013	20	2	10.7	N
RD	Ap	2013	20	3	9.7	N
RD	Ap	2013	20	4	12.9	N
RD	Ap	2013	21	1	13.2	Y
RD	Ap	2013	21	2	39.2	Y
RD	Ap	2013	21	3	14.3	N
RD	Ap	2013	21	4	15.8	N
RD	Ap	2013	21	5	28.7	N
RD	Ap	2013	22	1	48.5	Y
RD	Ap	2013	22	2	10.4	N
RD	Ap	2013	22	3	13	N
RD	Ap	2013	22	4	14.2	N
RD	Ap	2013	23	1	58.3	Y
RD	Ap	2013	23	2	24.2	Y
RD	Ap	2013	23	3	14.6	N
RD	Ap	2013	23	4	31.2	N
RD	Ap	2013	23	5	29.3	N
RD	Ap	2013	24	1	33.8	Y
RD	Ap	2013	24	2	8.3	Y
RD	Ap	2013	24	3	12.5	N
RD	Ap	2013	24	4	18.4	N
RD	Ap	2013	24	5	11.2	N
RD	Ap	2013	25	1	33	Y
RD	Ap	2013	25	2	19.8	Y
RD	Ap	2013	25	3	29	N
RD	Ap	2013	25	4	5.8	N
RD	Ap	2013	25	5	18.1	N
RD	Ap	2013	26	1	135.1	Y
RD	Ap	2013	26	2	86.5	Y
RD	Ap	2013	26	3	26	N
RD	Ap	2013	26	4	11.1	N
RD	Ap	2013	26	5	13.3	N
RD	Ap	2013	27	1	11.5	Y
RD	Ap	2013	27	2	35.5	N
RD	Ap	2013	27	3	9	N
RD	Ap	2013	27	4	15.4	N
RD	Ap	2013	28	1	233.6	Y
RD	Ap	2013	28	2	34.1	Y
RD	Ap	2013	28	3	4.2	N
RD	Ap	2013	28	4	10.1	N
RD	Ap	2013	28	5	24.5	N
RD	Ap	2013	29	1	25.1	Y
RD	Ap	2013	29	2	263.9	Y
RD	Ap	2013	29	3	84	N
RD	Ap	2013	29	4	39.2	N
RD	Ap	2013	29	5	61.3	N
RD	Ap	2013	30	1	19.6	Y
RD	Ap	2013	30	2	21.6	N
RD	Ap	2013	30	3	21.4	N
RD	Ap	2013	30	4	17	N
IV	Ap	2013	1	1	16.1	Y
IV	Ap	2013	1	2	20.6	Y
IV	Ap	2013	1	3	20.1	N
IV	Ap	2013	1	4	19.8	N
IV	Ap	2013	1	5	14.9	N
IV	Ap	2013	2	1	50.1	Y
IV	Ap	2013	2	2	44.6	N
IV	Ap	2013	2	3	14.1	N
IV	Ap	2013	2	4	23.9	N
IV	Ap	2013	3	1	42.3	Y
IV	Ap	2013	3	2	56.8	N
IV	Ap	2013	3	3	30.5	N
IV	Ap	2013	3	4	66.2	N
IV	Ap	2013	4	1	20.2	Y
IV	Ap	2013	4	2	19.7	N
IV	Ap	2013	4	3	20	N
IV	Ap	2013	4	4	29.1	N
IV	Ap	2013	5	1	40.2	Y
IV	Ap	2013	5	2	39	N
IV	Ap	2013	5	3	37.1	N
IV	Ap	2013	5	4	33.6	N
IV	Ap	2013	6	1	16.3	Y
IV	Ap	2013	6	2	32.1	Y
IV	Ap	2013	6	3	25	N
IV	Ap	2013	6	4	32.3	N
IV	Ap	2013	6	5	9.3	N
IV	Ap	2013	7	1	51.4	Y
IV	Ap	2013	7	2	28.2	N
IV	Ap	2013	7	3	22.8	N
IV	Ap	2013	7	4	23	N
IV	Ap	2013	8	1	33	Y
IV	Ap	2013	8	2	26.1	Y
IV	Ap	2013	8	3	69.5	N
IV	Ap	2013	8	4	23.2	N
IV	Ap	2013	8	5	11.8	N
IV	Ap	2013	9	1	93.2	Y
IV	Ap	2013	9	2	27.4	N
IV	Ap	2013	9	3	22.3	N
IV	Ap	2013	9	4	78.2	N
IV	Ap	2013	10	1	12.4	Y
IV	Ap	2013	10	2	138.6	N
IV	Ap	2013	10	3	42.1	N
IV	Ap	2013	10	4	12.2	N
IV	Ap	2013	11	1	44.5	Y
IV	Ap	2013	11	2	45.6	N
IV	Ap	2013	11	3	29.5	N
IV	Ap	2013	11	4	35.6	N
IV	Ap	2013	12	1	20	Y
IV	Ap	2013	12	2	17.7	N
IV	Ap	2013	12	3	20.8	N
IV	Ap	2013	12	4	12.3	N
IV	Ap	2013	13	1	57	Y
IV	Ap	2013	13	2	51.9	N
IV	Ap	2013	14	1	56.8	Y
IV	Ap	2013	14	2	27.1	Y
IV	Ap	2013	14	3	32	N
IV	Ap	2013	14	4	28.3	N
IV	Ap	2013	14	5	73.4	N
IV	Ap	2013	15	1	73.1	Y
IV	Ap	2013	16	1	22.9	Y
IV	Ap	2013	16	2	50.4	N
IV	Ap	2013	16	3	10.5	N
IV	Ap	2013	16	4	36.9	N
IV	Ap	2013	17	1	43.3	Y
IV	Ap	2013	17	2	61	Y
IV	Ap	2013	17	3	76.9	N
IV	Ap	2013	17	4	45.6	N
IV	Ap	2013	17	5	71.2	N
IV	Ap	2013	18	1	73.4	Y
IV	Ap	2013	18	2	28.3	N
IV	Ap	2013	18	3	24.3	N
IV	Ap	2013	18	4	51.3	N
IV	Ap	2013	19	1	48.1	Y
IV	Ap	2013	19	2	79.3	N
IV	Ap	2013	19	3	24	N
IV	Ap	2013	19	4	12.5	N
IV	Ap	2013	20	1	81.8	Y
IV	Ap	2013	20	2	51.3	N
IV	Ap	2013	20	3	15.8	N
IV	Ap	2013	20	4	31.3	N
IV	Ap	2013	21	1	42	Y
IV	Ap	2013	21	2	28.2	Y
IV	Ap	2013	21	3	16	N
IV	Ap	2013	21	4	11.3	N
IV	Ap	2013	21	5	22	N
IV	Ap	2013	22	1	68	Y
IV	Ap	2013	22	2	67.3	N
IV	Ap	2013	22	3	17.5	N
IV	Ap	2013	22	4	30.2	N
IV	Ap	2013	23	1	24.1	Y
IV	Ap	2013	23	2	18.6	Y
IV	Ap	2013	23	3	8.5	N
IV	Ap	2013	23	4	67.4	N
IV	Ap	2013	23	5	37.6	N
IV	Ap	2013	24	1	27.3	Y
IV	Ap	2013	24	2	53	Y
IV	Ap	2013	24	3	45.3	N
IV	Ap	2013	24	4	29	N
IV	Ap	2013	24	5	19.6	N
IV	Ap	2013	25	1	48	Y
IV	Ap	2013	25	2	46.6	N
IV	Ap	2013	25	3	10.8	N
IV	Ap	2013	25	4	23.2	N
IV	Ap	2013	26	1	49	Y
IV	Ap	2013	26	2	47.1	Y
IV	Ap	2013	26	3	49.7	N
IV	Ap	2013	26	4	25.2	N
IV	Ap	2013	26	5	41.3	N
IV	Ap	2013	27	1	53.9	Y
IV	Ap	2013	27	2	20.2	N
IV	Ap	2013	27	3	13.4	N
IV	Ap	2013	27	4	57.8	N
IV	Ap	2013	28	1	89	Y
IV	Ap	2013	28	2	57.6	N
IV	Ap	2013	28	3	7.1	N
IV	Ap	2013	28	4	11.1	N
IV	Ap	2013	29	1	110	Y
IV	Ap	2013	29	2	72.2	Y
IV	Ap	2013	29	3	111.3	N
IV	Ap	2013	29	4	102.9	N
IV	Ap	2013	29	5	27.2	N
IV	Ap	2013	30	1	63.1	Y
IV	Ap	2013	30	2	19.2	N
IV	Ap	2013	30	3	28.4	N
IV	Ap	2013	30	4	39	N
BV	As	2013	1	1	145.8	Y
BV	As	2013	2	1	99.1	Y
BV	As	2013	3	1	67.9	Y
BV	As	2013	3	2	68.8	Y
BV	As	2013	3	3	62.5	N
BV	As	2013	4	1	70.1	Y
BV	As	2013	4	2	73.8	Y
BV	As	2013	4	3	75.3	N
BV	As	2013	5	1	63.2	Y
BV	As	2013	5	2	56.5	Y
BV	As	2013	5	3	66.3	N
BV	As	2013	6	1	66.8	Y
BV	As	2013	6	2	39.2	Y
BV	As	2013	6	3	43.2	N
BV	As	2013	7	1	56.1	Y
BV	As	2013	7	2	24.2	N
BV	As	2013	7	3	13.5	N
BV	As	2013	7	4	49.7	N
BV	As	2013	8	1	69.4	Y
BV	As	2013	8	2	59.6	N
BV	As	2013	8	3	27.2	N
BV	As	2013	8	4	48.1	N
BV	As	2013	9	1	60.3	Y
BV	As	2013	9	2	71	Y
BV	As	2013	9	3	38.8	N
BV	As	2013	10	1	74	Y
BV	As	2013	10	2	21.3	N
BV	As	2013	10	3	9.7	N
BV	As	2013	10	4	11.2	N
BV	As	2013	11	1	34.2	Y
BV	As	2013	11	2	48.3	N
BV	As	2013	11	3	41	N
BV	As	2013	12	1	32.8	Y
BV	As	2013	12	2	66.4	N
BV	As	2013	12	3	63	N
BV	As	2013	13	1	78.6	Y
BV	As	2013	13	2	74.4	Y
BV	As	2013	14	1	63	Y
BV	As	2013	14	2	64.7	N
BV	As	2013	15	1	41.4	Y
BV	As	2013	15	2	50.1	N
BV	As	2013	15	3	83	N
BV	As	2013	16	1	102.2	Y
BV	As	2013	16	2	25.1	N
BV	As	2013	17	1	49.5	Y
BV	As	2013	17	2	63.9	N
BV	As	2013	17	3	53.6	N
BV	As	2013	17	4	63	N
BV	As	2013	18	1	57.3	Y
BV	As	2013	18	2	74.8	Y
BV	As	2013	18	3	21.3	N
BV	As	2013	19	1	24.2	Y
BV	As	2013	19	2	36.1	Y
BV	As	2013	19	3	42.3	N
BV	As	2013	19	4	68.2	N
BV	As	2013	20	1	61.7	Y
BV	As	2013	20	2	22	Y
BV	As	2013	20	3	48.1	Y
BV	As	2013	20	4	54.9	N
BV	As	2013	20	5	61.3	N
BV	As	2013	20	6	54.6	N
BV	As	2013	21	1	53.6	Y
BV	As	2013	21	2	25.5	N
BV	As	2013	21	3	93.9	N
BV	As	2013	21	4	66.2	N
BV	As	2013	22	1	112.6	Y
BV	As	2013	22	2	102.3	N
BV	As	2013	23	1	63.4	Y
BV	As	2013	23	2	63.5	N
BV	As	2013	23	3	12.6	N
BV	As	2013	23	4	49.7	N
BV	As	2013	24	1	81.7	Y
BV	As	2013	24	2	45.6	N
BV	As	2013	24	3	38.5	N
BV	As	2013	24	4	27.6	N
BV	As	2013	25	1	50.5	Y
BV	As	2013	25	2	63	Y
BV	As	2013	25	3	35.9	N
BV	As	2013	25	4	24.6	N
BV	As	2013	25	5	38	N
BV	As	2013	26	1	67.6	Y
BV	As	2013	26	2	42.7	N
BV	As	2013	26	3	20.4	N
BV	As	2013	26	4	39	N
BV	As	2013	27	1	84.9	Y
BV	As	2013	27	2	98.9	N
BV	As	2013	27	3	56.2	N
BV	As	2013	27	4	63	N
BV	As	2013	28	1	28.9	Y
BV	As	2013	28	2	122.3	Y
BV	As	2013	28	3	34.6	N
BV	As	2013	28	4	25.2	N
BV	As	2013	29	1	100.2	Y
BV	As	2013	29	2	60.3	N
BV	As	2013	30	1	37.6	Y
BV	As	2013	30	2	93.6	N
LM	As	2013	1	1	97.8	Y
LM	As	2013	1	2	70.2	Y
LM	As	2013	1	3	44.5	N
LM	As	2013	1	4	22.1	N
LM	As	2013	1	5	21	N
LM	As	2013	2	1	86.7	Y
LM	As	2013	2	2	26.1	Y
LM	As	2013	2	3	27.2	N
LM	As	2013	2	4	13.3	N
LM	As	2013	2	5	20.6	N
LM	As	2013	3	1	57.1	Y
LM	As	2013	3	2	65.4	Y
LM	As	2013	3	3	58.8	N
LM	As	2013	3	4	41.7	N
LM	As	2013	3	5	49.9	N
LM	As	2013	4	1	71.2	Y
LM	As	2013	4	2	60.1	N
LM	As	2013	4	3	40.3	N
LM	As	2013	4	4	26.3	N
LM	As	2013	5	1	36.3	Y
LM	As	2013	5	2	35.4	N
LM	As	2013	5	3	71.2	N
LM	As	2013	5	4	39.9	N
LM	As	2013	6	1	57.6	Y
LM	As	2013	6	2	22.5	Y
LM	As	2013	6	3	42	N
LM	As	2013	6	4	53.2	N
LM	As	2013	7	1	23.2	Y
LM	As	2013	7	2	37.6	Y
LM	As	2013	7	3	45.1	N
LM	As	2013	7	4	42.6	N
LM	As	2013	7	5	20	N
LM	As	2013	8	1	76	Y
LM	As	2013	8	2	50.1	Y
LM	As	2013	8	3	29.4	N
LM	As	2013	8	4	44.6	N
LM	As	2013	9	1	86.8	Y
LM	As	2013	9	2	84.2	N
LM	As	2013	9	3	28	N
LM	As	2013	10	1	75.2	Y
LM	As	2013	10	2	44.5	N
LM	As	2013	10	3	48.7	N
LM	As	2013	11	1	119	Y
LM	As	2013	11	2	139.3	N
LM	As	2013	12	1	83.2	Y
LM	As	2013	12	2	65.6	N
LM	As	2013	12	3	34.3	N
LM	As	2013	13	1	96.9	Y
LM	As	2013	13	2	13.5	N
LM	As	2013	14	1	32	Y
LM	As	2013	14	2	62.1	Y
LM	As	2013	14	3	34.4	N
LM	As	2013	14	4	42	N
LM	As	2013	14	5	54.5	N
LM	As	2013	15	1	35.2	Y
LM	As	2013	15	2	87.5	N
LM	As	2013	15	3	43.2	N
LM	As	2013	15	4	33.2	N
LM	As	2013	16	1	47.1	Y
LM	As	2013	17	1	48.3	Y
LM	As	2013	17	2	58.5	Y
LM	As	2013	17	3	18.3	N
LM	As	2013	17	4	44.7	N
LM	As	2013	17	5	20.5	N
LM	As	2013	18	1	75	Y
LM	As	2013	18	2	40.8	N
LM	As	2013	18	3	17.2	N
LM	As	2013	19	1	39.1	Y
LM	As	2013	19	2	50.6	N
LM	As	2013	19	3	21.1	N
LM	As	2013	19	4	16.7	N
LM	As	2013	20	1	36.2	Y
LM	As	2013	20	2	19.1	Y
LM	As	2013	20	3	34.1	N
LM	As	2013	20	4	49.4	N
LM	As	2013	20	5	21.5	N
LM	As	2013	21	1	18.7	Y
LM	As	2013	21	2	35.8	N
LM	As	2013	21	3	22.3	N
LM	As	2013	21	4	14.2	N
LM	As	2013	22	1	55.6	Y
LM	As	2013	22	2	11.8	N
LM	As	2013	22	3	44.1	N
LM	As	2013	22	4	22.5	N
LM	As	2013	23	1	33.6	Y
LM	As	2013	23	2	72.8	N
LM	As	2013	23	3	19.6	N
LM	As	2013	23	4	33.4	N
LM	As	2013	24	1	31.4	Y
LM	As	2013	24	2	18.8	N
LM	As	2013	24	3	59.9	N
LM	As	2013	25	1	95.3	Y
LM	As	2013	25	2	33	N
LM	As	2013	25	3	17.9	N
LM	As	2013	25	4	17.3	N
LM	As	2013	26	1	21.8	Y
LM	As	2013	26	2	48.1	N
LM	As	2013	26	3	71.8	N
LM	As	2013	26	4	38.6	N
LM	As	2013	27	1	34.2	Y
LM	As	2013	27	2	45	Y
LM	As	2013	27	3	56.2	N
LM	As	2013	27	4	30.4	N
LM	As	2013	27	5	22.1	N
LM	As	2013	28	1	34	Y
LM	As	2013	28	2	17.2	N
LM	As	2013	28	3	8.8	N
LM	As	2013	28	4	13.7	N
LM	As	2013	29	1	67.1	Y
LM	As	2013	29	2	35	Y
LM	As	2013	29	3	27.3	N
LM	As	2013	29	4	12	N
LM	As	2013	29	5	30.1	N
LM	As	2013	30	1	32.3	Y
LM	As	2013	30	2	44.2	N
LM	As	2013	30	3	32.7	N
LM	As	2013	30	4	21.3	N
PN	As	2013	1	1	20.2	Y
PN	As	2013	1	2	18	Y
PN	As	2013	1	3	13.2	N
PN	As	2013	1	4	25.9	N
PN	As	2013	1	5	18.8	N
PN	As	2013	2	1	10.9	Y
PN	As	2013	2	2	21.2	Y
PN	As	2013	2	3	29.3	N
PN	As	2013	2	4	19.2	N
PN	As	2013	2	5	10.6	N
PN	As	2013	3	1	54.6	Y
PN	As	2013	3	2	15.5	Y
PN	As	2013	3	3	17.3	Y
PN	As	2013	3	4	18	N
PN	As	2013	3	5	11.5	N
PN	As	2013	3	6	18.6	N
PN	As	2013	4	1	29.5	Y
PN	As	2013	4	2	27.9	Y
PN	As	2013	4	3	13.6	N
PN	As	2013	4	4	22.8	N
PN	As	2013	4	5	11.5	N
PN	As	2013	5	1	40.3	Y
PN	As	2013	5	2	30.2	Y
PN	As	2013	5	3	13	N
PN	As	2013	5	4	23.1	N
PN	As	2013	5	5	30.4	N
PN	As	2013	6	1	17.5	Y
PN	As	2013	6	2	32.9	Y
PN	As	2013	6	3	21.9	Y
PN	As	2013	6	4	18.9	N
PN	As	2013	6	5	25.7	N
PN	As	2013	6	6	5.5	N
PN	As	2013	7	1	23.6	Y
PN	As	2013	7	2	19.2	Y
PN	As	2013	7	3	11.4	N
PN	As	2013	7	4	9.7	N
PN	As	2013	7	5	19.3	N
PN	As	2013	8	1	22.8	Y
PN	As	2013	8	2	22.6	Y
PN	As	2013	8	3	3	N
PN	As	2013	8	4	21.2	N
PN	As	2013	8	5	24.1	N
PN	As	2013	9	1	35.8	Y
PN	As	2013	9	2	19.7	Y
PN	As	2013	9	3	12.2	N
PN	As	2013	9	4	6.5	N
PN	As	2013	9	5	33.6	N
PN	As	2013	10	1	38.7	Y
PN	As	2013	10	2	16.2	N
PN	As	2013	10	3	15.1	N
PN	As	2013	10	4	11.6	N
PN	As	2013	11	1	35.3	Y
PN	As	2013	11	2	9.7	N
PN	As	2013	11	3	15.3	N
PN	As	2013	11	4	27.3	N
PN	As	2013	12	1	13.3	Y
PN	As	2013	12	2	33.2	N
PN	As	2013	12	3	12.8	N
PN	As	2013	12	4	7.3	N
PN	As	2013	13	1	33.4	Y
PN	As	2013	13	2	10.5	Y
PN	As	2013	13	3	25.7	Y
PN	As	2013	13	4	14.1	N
PN	As	2013	13	5	4.5	N
PN	As	2013	13	6	21	N
PN	As	2013	14	1	33.6	Y
PN	As	2013	14	2	30	Y
PN	As	2013	14	3	41	Y
PN	As	2013	14	4	29.8	N
PN	As	2013	14	5	15.5	N
PN	As	2013	14	6	18.3	N
PN	As	2013	15	1	20.6	Y
PN	As	2013	15	2	11.3	Y
PN	As	2013	15	3	11.9	N
PN	As	2013	15	4	39.2	N
PN	As	2013	15	5	15.3	N
PN	As	2013	16	1	20.3	Y
PN	As	2013	16	2	49.6	Y
PN	As	2013	16	3	20.1	N
PN	As	2013	16	4	28.1	N
PN	As	2013	16	5	20.3	N
PN	As	2013	17	1	31.8	Y
PN	As	2013	17	2	30.7	Y
PN	As	2013	17	3	24.5	N
PN	As	2013	17	4	34	N
PN	As	2013	17	5	20.6	N
PN	As	2013	18	1	42.5	Y
PN	As	2013	18	2	18.3	N
PN	As	2013	18	3	67.8	N
PN	As	2013	18	4	9	N
PN	As	2013	19	1	53.6	Y
PN	As	2013	19	2	32.2	N
PN	As	2013	19	3	32	N
PN	As	2013	19	4	22.6	N
PN	As	2013	20	1	54.1	Y
PN	As	2013	20	2	48.5	N
PN	As	2013	20	3	34.1	N
PN	As	2013	20	4	24.1	N
PN	As	2013	21	1	51.2	Y
PN	As	2013	21	2	48.1	N
PN	As	2013	21	3	55.5	N
PN	As	2013	21	4	53.1	N
PN	As	2013	22	1	100.5	Y
PN	As	2013	22	2	36.9	N
PN	As	2013	22	3	48.1	N
PN	As	2013	22	4	40.7	N
PN	As	2013	23	1	48.9	Y
PN	As	2013	23	2	32.4	N
PN	As	2013	23	3	50.1	N
PN	As	2013	23	4	32.6	N
PN	As	2013	24	1	39.3	Y
PN	As	2013	24	2	44.8	N
PN	As	2013	24	3	37.1	N
PN	As	2013	24	4	27.4	N
PN	As	2013	25	1	64	Y
PN	As	2013	25	2	64.5	N
PN	As	2013	25	3	65.6	N
PN	As	2013	25	4	36.9	N
PN	As	2013	26	1	37.7	Y
PN	As	2013	26	2	27.3	N
PN	As	2013	26	3	25.2	N
PN	As	2013	26	4	59.6	N
PN	As	2013	27	1	69.1	Y
PN	As	2013	27	2	11.2	N
PN	As	2013	27	3	50.4	N
PN	As	2013	27	4	44.1	N
PN	As	2013	28	1	20.4	Y
PN	As	2013	28	2	20.5	Y
PN	As	2013	28	3	13.5	N
PN	As	2013	28	4	14.9	N
PN	As	2013	28	5	24.9	N
PN	As	2013	29	1	23	Y
PN	As	2013	29	2	9.7	Y
PN	As	2013	29	3	28.8	N
PN	As	2013	29	4	23.7	N
PN	As	2013	29	5	3.5	N
PN	As	2013	30	1	25.4	Y
PN	As	2013	30	2	13.8	Y
PN	As	2013	30	3	5.1	N
PN	As	2013	30	4	14.9	N
PN	As	2013	30	5	15.3	N
MR	As	2013	1	1	30.1	Y
MR	As	2013	1	2	22.2	Y
MR	As	2013	1	3	43.1	N
MR	As	2013	1	4	12.3	N
MR	As	2013	1	5	19.7	N
MR	As	2013	2	1	18.7	Y
MR	As	2013	2	2	8.6	Y
MR	As	2013	2	3	18.6	N
MR	As	2013	2	4	13	N
MR	As	2013	2	5	9.7	N
MR	As	2013	3	1	28.3	Y
MR	As	2013	3	2	19.9	N
MR	As	2013	3	3	47.6	N
MR	As	2013	3	4	11.9	N
MR	As	2013	4	1	29.6	Y
MR	As	2013	4	2	19.1	Y
MR	As	2013	4	3	34.3	N
MR	As	2013	5	1	31.2	Y
MR	As	2013	5	2	22	Y
MR	As	2013	5	3	29.4	N
MR	As	2013	5	4	25.5	N
MR	As	2013	5	5	24.3	N
MR	As	2013	6	1	26.8	Y
MR	As	2013	6	2	17.9	Y
MR	As	2013	6	3	18.9	N
MR	As	2013	6	4	25.6	N
MR	As	2013	7	1	22.8	Y
MR	As	2013	7	2	14.1	Y
MR	As	2013	7	3	43.6	N
MR	As	2013	7	4	12.1	N
MR	As	2013	7	5	11.6	N
MR	As	2013	8	1	43	Y
MR	As	2013	8	2	43.5	N
MR	As	2013	8	3	27.3	N
MR	As	2013	9	1	38.7	Y
MR	As	2013	9	2	14	N
MR	As	2013	9	3	7.8	N
MR	As	2013	9	4	17.2	N
MR	As	2013	10	1	64.3	Y
MR	As	2013	10	2	19.2	N
MR	As	2013	10	3	37.9	N
MR	As	2013	10	4	23.6	N
MR	As	2013	11	1	31.2	Y
MR	As	2013	11	2	35.7	Y
MR	As	2013	11	3	38	N
MR	As	2013	11	4	30.5	N
MR	As	2013	12	1	61.1	Y
MR	As	2013	12	2	20.8	N
MR	As	2013	13	1	43.9	Y
MR	As	2013	13	2	22	N
MR	As	2013	14	1	42.8	Y
MR	As	2013	14	2	26.7	Y
MR	As	2013	14	3	45.3	N
MR	As	2013	15	1	28.4	Y
MR	As	2013	16	1	57.4	Y
MR	As	2013	17	1	45	Y
MR	As	2013	18	1	24.6	Y
MR	As	2013	18	2	31.7	Y
MR	As	2013	18	3	12.7	N
MR	As	2013	18	4	9.8	N
MR	As	2013	18	5	27.2	N
MR	As	2013	19	1	32.2	Y
MR	As	2013	19	2	47.3	Y
MR	As	2013	19	3	27.7	N
MR	As	2013	19	4	39.2	N
MR	As	2013	19	5	27.7	N
MR	As	2013	20	1	37.1	Y
MR	As	2013	20	2	14.2	N
MR	As	2013	20	3	14.3	N
MR	As	2013	20	4	15.6	N
MR	As	2013	21	1	14.2	Y
MR	As	2013	21	2	11.8	N
MR	As	2013	21	3	14.9	N
MR	As	2013	22	1	27.3	Y
MR	As	2013	22	2	26.4	N
MR	As	2013	22	3	28.5	N
MR	As	2013	22	4	12.3	N
MR	As	2013	23	1	19.8	Y
MR	As	2013	23	2	15.2	N
MR	As	2013	23	3	14.2	N
MR	As	2013	23	4	41.3	N
MR	As	2013	24	1	29.2	Y
MR	As	2013	24	2	16	N
MR	As	2013	25	1	29.1	Y
MR	As	2013	25	2	15.6	N
MR	As	2013	25	3	15.9	N
MR	As	2013	26	1	26.1	Y
MR	As	2013	26	2	19.3	N
MR	As	2013	26	3	39.3	N
MR	As	2013	27	1	43.6	Y
MR	As	2013	27	2	45.3	N
MR	As	2013	27	3	29.7	N
MR	As	2013	28	1	29.3	Y
MR	As	2013	28	2	21.8	N
MR	As	2013	28	3	16.9	N
MR	As	2013	28	4	28.2	N
MR	As	2013	29	1	37.3	Y
MR	As	2013	30	1	27.1	Y
MR	As	2013	30	2	32.2	N
MR	As	2013	30	3	21.7	N
MR	As	2013	30	4	37.6	N

[truncated: 4 more sheets:  Viability,  Decay, Decay (Temporal), Visual vs Actual Pod Estimates]
