# Supplementary material for: Seed survival of Australian Acacia in the Western Cape of South Africa in the presence of biological control agents and given environmental variation
Source: PeerJ journal article supplement (doi:10.7717/peerj.6816), 2019-04-29

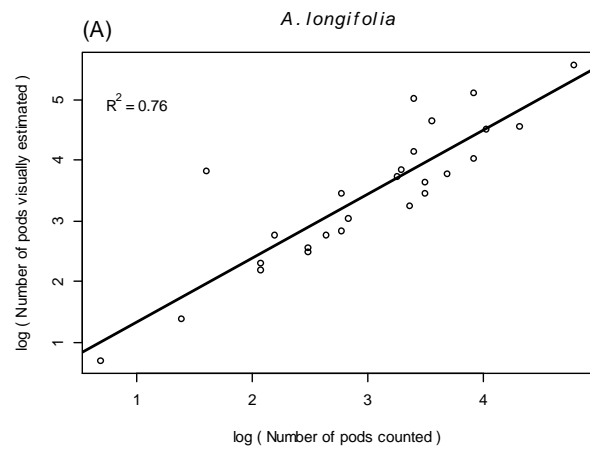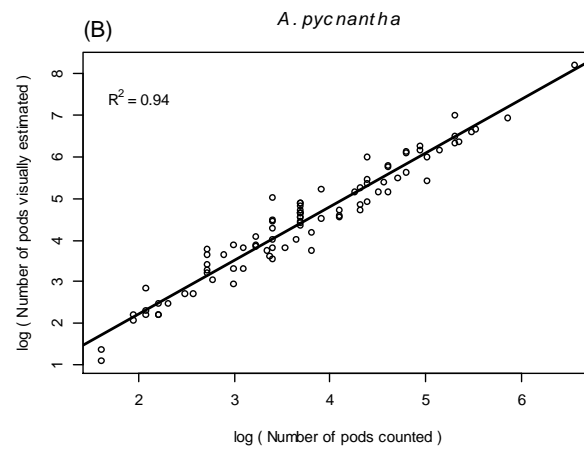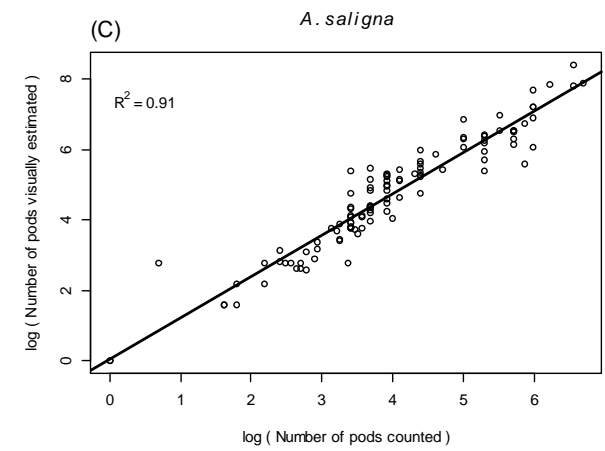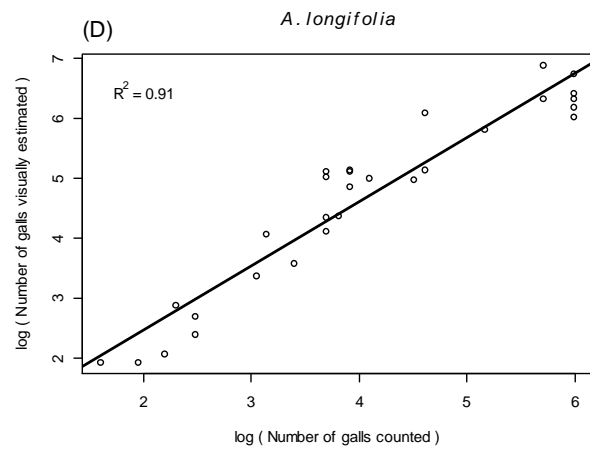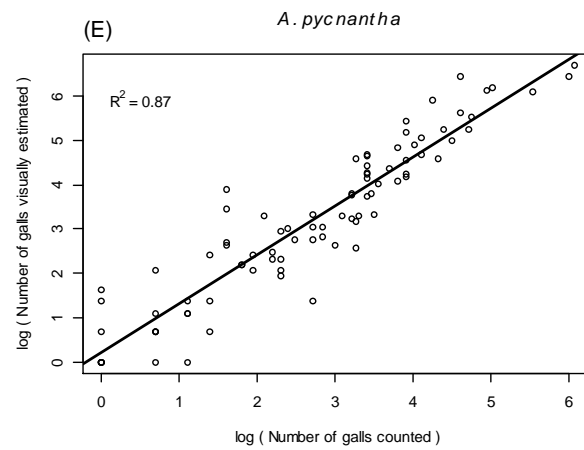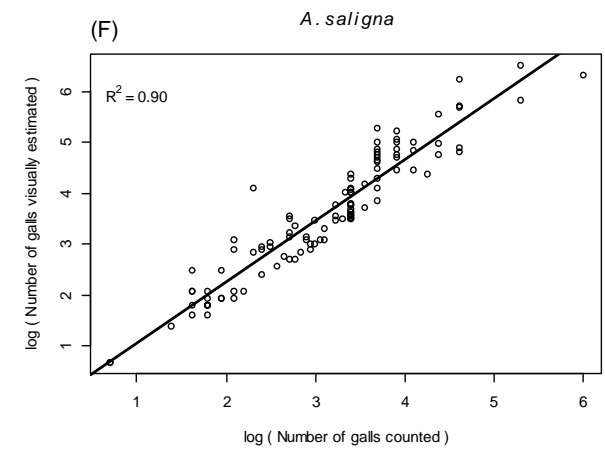

Supplement: FigureS1.pdf [file FigureS1.pdf]
